# Supplementary material for: Catalyst-free inverse-electron-demand aza-Diels–Alder reaction of 4,4-dicyano-2-methylenebut-3-enoates and 1,3,5-triazinanes: access to polysubstituted tetrahydropyridines
Source: Royal Society of Chemistry journal article supplement (doi:10.1039/d3ob00511a), 2023-01-01

## *Supporting Information for*

# **Catalyst-free inverse-electron-demand aza-Diels-Alder reaction of 4,4-dicyano-2-methylenebut-3-enoates and 1,3,5-triazinanes: access to polysubstituted tetrahydropyridines**

Dezhi Yang,<sup>\*a,b</sup> Meng Zhu,<sup>a,b,†</sup> Taimin Wang,<sup>b,†</sup> Yixuan He,<sup>b</sup> Lang Xie,<sup>a,b</sup> Jiayong Zhang,<sup>\*b</sup> and Bin Cheng<sup>\*a,b</sup>

<sup>a</sup>School of Pharmacy, Zunyi Medical University, Zunyi 563000, China. E-mail: lpydz@163.com

<sup>b</sup>Institute of Marine Biomedicine/Postdoctoral Innovation Practice Base, Shenzhen Polytechnic, Shenzhen 518055, China. E-mail:

zhangjiayong@mail.nankai.edu.cn; chengbin@szpt.edu.cn

† These authors contributed equally to this work.

## **Table of Contents**

|                                                                                                                                 |            |
|---------------------------------------------------------------------------------------------------------------------------------|------------|
| <b>1. General Information</b> .....                                                                                             | <b>S2</b>  |
| <b>2. General Procedures for Synthesis of 1,3-Dienes 1 and 4</b> .....                                                          | <b>S2</b>  |
| <b>3. General Procedures for Synthesis of 1,3,5-triazinanes 2</b> .....                                                         | <b>S3</b>  |
| <b>4. General Procedures for the aza-Diels-Alder reaction between electron-deficient 1,3-dienes and 1,3,5-triazinanes</b> ..... | <b>S3</b>  |
| <b>5. Further transformation of 3a</b> .....                                                                                    | <b>S4</b>  |
| <b>6. References</b> .....                                                                                                      | <b>S5</b>  |
| <b>7. Characterization Data of New Compounds</b> .....                                                                          | <b>S6</b>  |
| <b>8. X-ray Crystallographic Structure and Data of 3a and 10a</b> .....                                                         | <b>S17</b> |
| <b>9. <sup>1</sup>H, <sup>13</sup>C, <sup>19</sup>F NMR Spectra of New Compounds</b> .....                                      | <b>S20</b> |

## 1. General Information

Unless otherwise specified, all reactions were conducted under anhydrous conditions. All solvents were distilled and dried according to the standard procedures. All chemicals or reagents which are commercially available were used without further purification. Thin-layer chromatography (TLC) was performed on silica gel plates (GF-254) using UV-light (254 and 365 nm). Column chromatography was performed by using silica gel (200-300 mesh) as stationary phase eluting with petroleum ether (60–90 °C) and ethyl acetate.  $^1\text{H}$  NMR,  $^{13}\text{C}$  NMR and  $^{19}\text{F}$  NMR spectra were recorded at ambient temperature in  $\text{CDCl}_3$  on a JEOL 400 MHz spectrometer. Chemical shifts were reported in parts per million (ppm) and tetramethylsilane (TMS) was used as the internal standard. HRMS spectra were acquired in the ESI mode by using the mass analyzer of TOF. Melting points were determined on a micro melting point apparatus.

## 2. General Procedures for Synthesis of 1,3-Dienes **1** and **4**

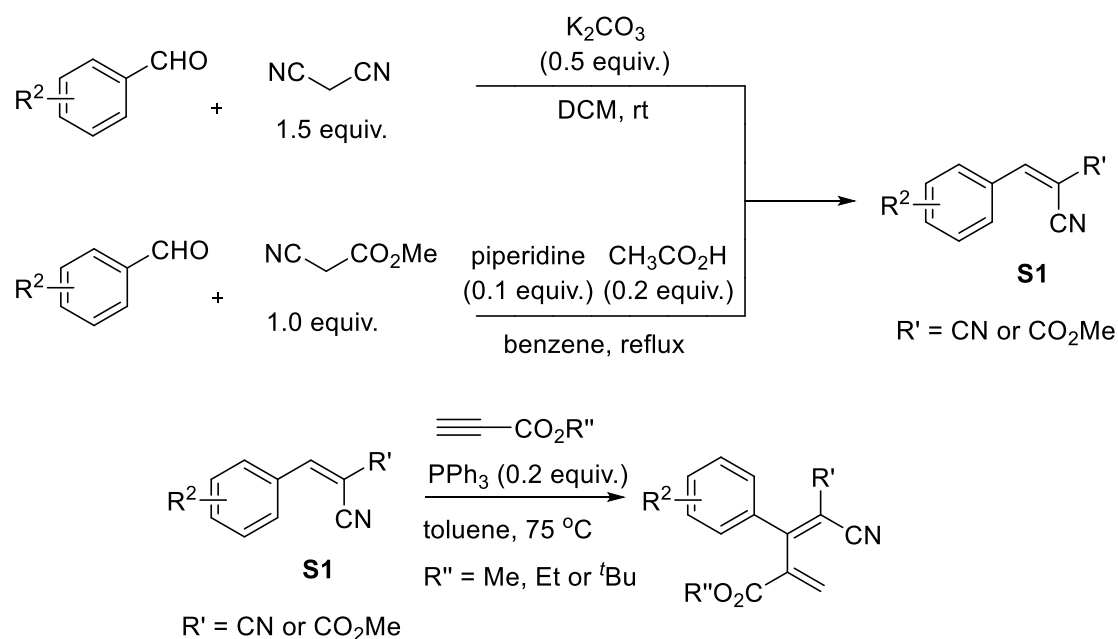

The substrate 1,3-dienes **1**<sup>1,2</sup> and **4**<sup>3</sup> were prepared according to the literature.

**Synthetic procedure for  $\text{R}' = \text{CN}$ .** To a solution of aldehyde (1 mmol, 1.0 equiv) and nitrile (1.5 mmol, 1.5 equiv) in  $\text{CH}_2\text{Cl}_2$  (10 mL) was added  $\text{K}_2\text{CO}_3$  (207 mg, 1.5 mmol, 1.5 equiv). The mixture was stirred at room temperature and monitored by TLC until the aldehyde was consumed completely. Then the resulting solution was washed with  $\text{H}_2\text{O}$ , and extracted with  $\text{CH}_2\text{Cl}_2$ . The combined organic layers were washed with brine and

dried over Na<sub>2</sub>SO<sub>4</sub>. After filtration, the solvent was evaporated under reduced pressure to give a residue, which was purified by silica gel flash column chromatography using petroleum ether/ethyl acetate (5:1) as the eluent to afford **S1**.

**Synthetic procedure for R' = CO<sub>2</sub>Me.** To a solution of aldehyde (10 mmol, 1.0 equiv), methyl cyanoacetate (10 mmol, 1.0 equiv), and piperidine (85 mg, 1.0 mmol) in benzene (20 mL) was added glacial acetic acid (120 mg, 2.0 mmol), and the mixture was heated at refluxing until the starting materials were consumed as indicated by TLC analysis. After being cooled down to room temperature, the reaction mixture was diluted with Sat NaHCO<sub>3</sub> and extracted with EtOAc. The combined organic phases were dried with anhydrous Na<sub>2</sub>SO<sub>4</sub>. The mixture was filtered and the filtrate was concentrated under reduced pressure to give a residue, which was purified by silica gel column chromatography using petroleum ether/ethyl acetate (10:1) to afford alkene **S1**.

To a solution of **S1** (2.0 mmol) and PPh<sub>3</sub> (105 mg, 0.2 equiv) in toluene (20 mL) at 75 °C was added slowly a solution of propiolate (2.4 mmol, 1.2 equiv) in toluene (20 mL) within 3 h. Once the addition was finished, the reaction mixture was cooled down to room temperature. The solvent was evaporated to give a residue, which was purified by silica gel column chromatography using petroleum ether/ethyl acetate (15:1) as the eluent to give the corresponding 1,3-diene substrate.

### 3. General Procedures for Synthesis of 1,3,5-triazinanes **2**

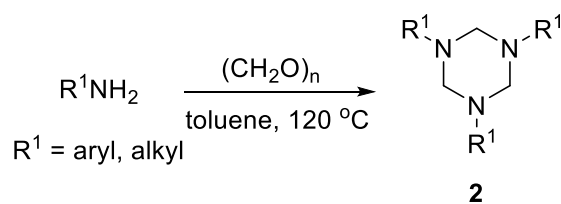

The substrate **2** was prepared according to the literature.<sup>4</sup>

To a solution of paraformaldehyde (1 mmol) in toluene (75 mL) was added amine (1 mmol), and then the mixture was stirred and refluxed at 120 °C for 2 h. The mixture was cooled, filtered, and washed three times with cold toluene. The product was dried at 60 °C without further purification to give the corresponding 1,3,5-triazinane.

#### 4. General Procedures for the aza-Diels-Alder reaction between electron-deficient 1,3-dienes and 1,3,5-triazinanes

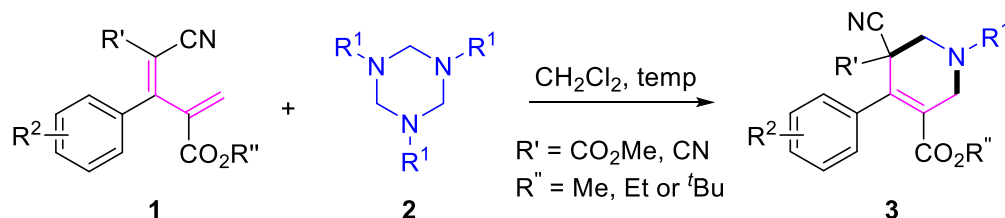

To a solution of **1** (0.2 mmol, 1.0 equiv) in dry DCM (2 mL) was added **2** (0.16 mmol, 0.8 equiv), and the mixture was stirred at room temperature for 40 min unless otherwise noted. Heating at 50 °C for 3 h (**3j**) or for 6 h (**5a** and **5b**) was adopted instead. After completion of the annulation reaction monitored by TLC, the solvent was evaporated and the resulting residue was purified directly by silica gel column chromatography (petroleum ether/ethyl acetate = 10:1) to afford the desired product **3**.

The synthesis of **5a** and **5b** in Scheme 3 follows the same procedure as **3** and the starting material of **4** (0.2 mmol) was adopted.

#### 5. Further transformation of **3a**

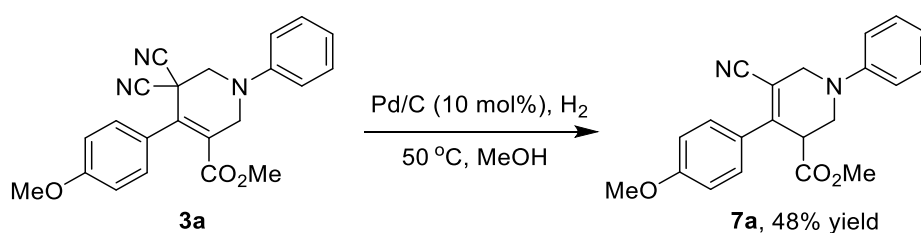

To a solution of **3a** (95 mg, 0.25 mmol) in methanol (5 mL) was added Pd/C (15 mg, 10 mol%). Then the reaction mixture was added HCl (0.3 mL, 0.01 M) and charged with H<sub>2</sub>. The reaction mixture was heated at 50 °C for 17 h. Until **3a** was consumed completely according to the results as monitored by TLC, the reaction mixture was filtered through a plug of celite and washed with CH<sub>2</sub>Cl<sub>2</sub>. The filtrate was added saturated NaHCO<sub>3</sub> solution and adjusted to be neutral. The filtrate was extracted with CH<sub>2</sub>Cl<sub>2</sub>. Then the resulting solution was dried over Na<sub>2</sub>SO<sub>4</sub>. After filtration, the solvent

was evaporated under reduced pressure to give a residue, which was purified by silica gel column chromatography using petroleum ether/ethyl acetate (10:1) as the eluent to afford **7a** (43 mg, 48% yield) as a yellow solid.

## 6. References

1. F. Lan, C. Zhou, X. Huang, B. An and X. Zhang, *Green Chem.*, 2022, **24**, 2391–2396.
2. X. Jiang, D. Fu, X. Shi, S. Wang and R. Wang, *Chem. Commun.*, 2011, **47**, 8289–8291.
3. S.-S. Zhang, D.-C. Wang, M.-S. Xie, G.-R. Qu and H.-M. Guo, *Org. Lett.*, 2018, **20**, 8026–8029.
4. E. M. Nour-Eddine, Q. Yuan, F. Huang, *J. Appl. Polym. Sci.*, 2012, **125**, 1773–1781.

## 7. Characterization Data of New Compounds

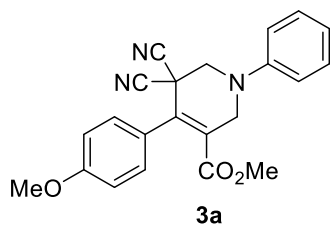

### Methyl 5,5-dicyano-4-(4-methoxyphenyl)-1-phenyl-1,2,5,6-tetrahydropyridine-3-carboxylate (**3a**)

Compound **3a** (58 mg, 78% yield,  $R_f = 0.7$  (PE/DCM = 1:1.5)) was isolated as a yellow solid, m.p. 115–116 °C.

$^1\text{H NMR}$  (400 MHz,  $\text{CDCl}_3$ )  $\delta$  7.40–7.33 (m, 2H), 7.31 (d,  $J = 8.7$  Hz, 2H), 7.11–7.01 (m, 3H), 6.97 (d,  $J = 8.7$  Hz, 2H), 4.15 (s, 2H), 4.06 (s, 2H), 3.85 (s, 3H), 3.55 (s, 3H).

$^{13}\text{C NMR}$  (100 MHz,  $\text{CDCl}_3$ )  $\delta$  165.9, 160.6, 148.0, 134.0, 133.7, 129.8, 129.8, 127.2, 122.5, 117.4, 114.3, 113.1, 56.4, 55.4, 52.6, 49.1, 39.4.

**HRMS** (ESI)  $m/z$ :  $[\text{M} + \text{H}]^+$  Calcd for  $\text{C}_{22}\text{H}_{20}\text{N}_3\text{O}_3$  374.1499, found 374.1499.

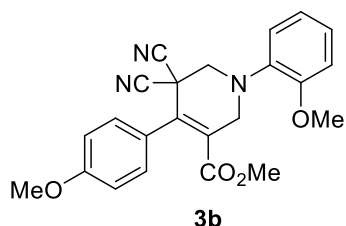

### Methyl 5,5-dicyano-1-(2-methoxyphenyl)-4-(4-methoxyphenyl)-1,2,5,6-tetrahydropyridine-3-carboxylate (**3b**)

Compound **3b** (60 mg, 74% yield,  $R_f = 0.5$  (PE/EA = 5:1)) was isolated as a yellow solid, m.p. 98–99 °C.

$^1\text{H NMR}$  (400 MHz,  $\text{CDCl}_3$ )  $\delta$  7.37–7.31 (m, 2H), 7.14 (td,  $J = 7.8, 1.6$  Hz, 1H), 7.07 (dd,  $J = 8.0, 1.5$  Hz, 1H), 6.99–6.92 (m, 4H), 4.09 (s, 2H), 3.95 (s, 2H), 3.94 (s, 3H), 3.85 (s, 3H), 3.53 (s, 3H).

$^{13}\text{C NMR}$  (100 MHz,  $\text{CDCl}_3$ )  $\delta$  166.2, 160.5, 153.2, 136.9, 134.3, 133.6, 129.9, 127.4, 125.4, 121.2, 120.7, 114.2, 113.3, 112.0, 55.9, 55.6, 55.4, 52.4, 49.9, 39.1.

**HRMS** (ESI)  $m/z$ :  $[\text{M} + \text{H}]^+$  Calcd for  $\text{C}_{23}\text{H}_{22}\text{N}_3\text{O}_4$  404.1605, found 404.1607.

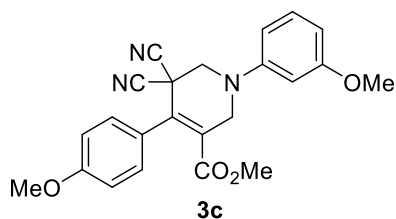

**Methyl 5,5-dicyano-1-(3-methoxyphenyl)-4-(4-methoxyphenyl)-1,2,5,6-tetrahydropyridine-3-carboxylate (3c)**

Compound **3c** (48 mg, 60% yield,  $R_f = 0.4$  (PE/EA = 5:1)) was isolated as a yellow solid; m.p. 98–99 °C.

$^1\text{H NMR}$  (400 MHz,  $\text{CDCl}_3$ )  $\delta$  7.33–7.28 (m, 2H), 7.27–7.24 (m, 1H), 6.99–6.94 (m, 2H), 6.69–6.64 (m, 1H), 6.61–6.56 (m, 2H), 4.14 (s, 2H), 4.05 (s, 2H), 3.85 (s, 3H), 3.83 (s, 3H), 3.55 (s, 3H).

$^{13}\text{C NMR}$  (100 MHz,  $\text{CDCl}_3$ )  $\delta$  165.9, 161.0, 160.6, 149.3, 134.0, 133.6, 130.6, 129.8, 127.1, 114.3, 113.0, 109.7, 107.2, 103.9, 56.2, 55.5, 55.4, 52.6, 49.0, 39.3.

**HRMS** (ESI)  $m/z$ :  $[\text{M} + \text{H}]^+$  Calcd for  $\text{C}_{23}\text{H}_{22}\text{N}_3\text{O}_4$  404.1605, found 404.1606.

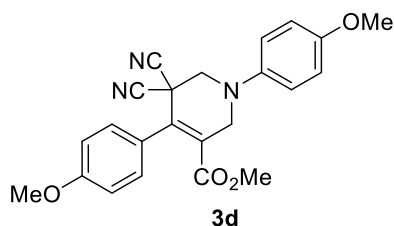

**Methyl 5,5-dicyano-1,4-bis(4-methoxyphenyl)-1,2,5,6-tetrahydropyridine-3-carboxylate (3d)**

Compound **3d** (55 mg, 68% yield,  $R_f = 0.6$  (PE/EA = 5:1)) was isolated as a yellow solid; m.p. 99–100 °C.

$^1\text{H NMR}$  (400 MHz,  $\text{CDCl}_3$ )  $\delta$  7.34–7.28 (m, 2H), 7.08–7.02 (m, 2H), 6.99–6.94 (m, 2H), 6.93–6.88 (m, 2H), 4.05 (s, 2H), 3.92 (s, 2H), 3.85 (s, 3H), 3.80 (s, 3H), 3.54 (s, 3H).

$^{13}\text{C NMR}$  (100 MHz,  $\text{CDCl}_3$ )  $\delta$  166.0, 160.5, 155.9, 142.0, 134.0, 133.7, 129.8, 127.2, 120.2, 115.0, 114.3, 113.2, 57.6, 55.7, 55.4, 52.5, 50.4, 39.5.

**HRMS** (ESI)  $m/z$ :  $[\text{M} + \text{H}]^+$  Calcd for  $\text{C}_{23}\text{H}_{22}\text{N}_3\text{O}_4$  404.1605, found 404.1606.

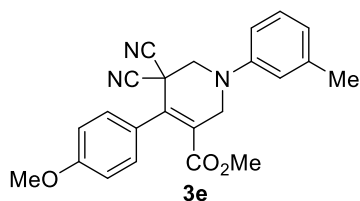

**Methyl 5,5-dicyano-4-(4-methoxyphenyl)-1-(m-tolyl)-1,2,5,6-tetrahydropyridine-3-carboxylate (3e)**

Compound **3e** (48 mg, 62% yield,  $R_f = 0.4$  (PE/EA = 5:1)) was isolated as a yellow solid; m.p. 122–123 °C.

$^1\text{H NMR}$  (400 MHz,  $\text{CDCl}_3$ )  $\delta$  7.31 (d,  $J = 8.7$  Hz, 2H), 7.25 (t,  $J = 7.4$  Hz, 1H), 6.97 (d,  $J = 8.8$  Hz, 2H), 6.92–6.82 (m, 3H), 4.14 (s, 2H), 4.04 (s, 2H), 3.85 (s, 3H), 3.55 (s, 3H), 2.37 (s, 3H).

$^{13}\text{C NMR}$  (100 MHz,  $\text{CDCl}_3$ )  $\delta$  166.0, 160.6, 148.0, 139.7, 133.9, 133.8, 129.8, 129.6, 127.2, 123.4, 118.2, 114.4, 114.3, 113.1, 56.4, 55.4, 52.5, 49.2, 39.4, 21.8.

**HRMS** (ESI)  $m/z$ :  $[\text{M} + \text{H}]^+$  Calcd for  $\text{C}_{23}\text{H}_{22}\text{N}_3\text{O}_3$  388.1656, found 388.1656.

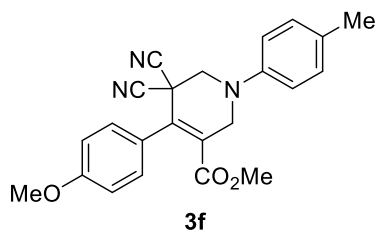

**Methyl 5,5-dicyano-4-(4-methoxyphenyl)-1-(p-tolyl)-1,2,5,6-tetrahydropyridine-3-carboxylate (3f)**

Compound **3f** (60 mg, 77% yield,  $R_f = 0.4$  (PE/EA = 5:1)) was isolated as a yellow solid; m.p. 125–126 °C.

$^1\text{H NMR}$  (400 MHz,  $\text{CDCl}_3$ )  $\delta$  7.34–7.29 (m, 2H), 7.17 (d,  $J = 8.3$  Hz, 2H), 7.00–6.95 (m, 4H), 4.11 (s, 2H), 4.00 (s, 2H), 3.85 (s, 3H), 3.55 (s, 3H), 2.33 (s, 3H).

$^{13}\text{C NMR}$  (100 MHz,  $\text{CDCl}_3$ )  $\delta$  166.0, 160.5, 145.8, 133.9, 133.8, 132.3, 130.3, 129.8, 127.2, 117.8, 114.2, 113.1, 56.8, 55.4, 52.5, 49.5, 39.4, 20.7.

**HRMS** (ESI)  $m/z$ :  $[\text{M} + \text{H}]^+$  Calcd for  $\text{C}_{23}\text{H}_{22}\text{N}_3\text{O}_3$  388.1656, found 388.1656.

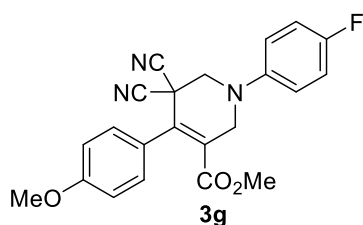

**Methyl 5,5-dicyano-1-(4-fluorophenyl)-4-(4-methoxyphenyl)-1,2,5,6-tetrahydropyridine-3-carboxylate (3g)**

Compound **3g** (50 mg, 64% yield,  $R_f = 0.6$  (PE/DCM = 1:1)) was isolated as a yellow solid; m.p. 130–131 °C.



**<sup>1</sup>H NMR** (400 MHz, CDCl<sub>3</sub>) δ 7.31 (d, *J* = 8.5 Hz, 2H), 7.05 (d, *J* = 4.9 Hz, 4H), 6.96 (d, *J* = 8.5 Hz, 2H), 4.09 (s, 2H), 3.98 (s, 2H), 3.85 (s, 3H), 3.54 (s, 3H).

**<sup>13</sup>C NMR** (100 MHz, CDCl<sub>3</sub>) δ 165.8, 160.6, 158.8 (d, *J* = 243.8 Hz), 144.4 (d, *J* = 2.3 Hz), 133.9, 133.6, 129.8, 127.1, 119.7 (d, *J* = 8.0 Hz), 116.4 (d, *J* = 22.8 Hz), 114.3, 113.0, 57.1, 55.4, 52.6, 49.9, 39.4.

**<sup>19</sup>F NMR** (376 MHz, CDCl<sub>3</sub>) δ -120.2.

**HRMS** (ESI) *m/z*: [M + H]<sup>+</sup> Calcd for C<sub>22</sub>H<sub>19</sub>FN<sub>3</sub>O<sub>3</sub> 392.1405, found 392.1405.

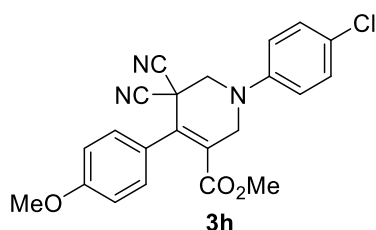

**Methyl 1-(4-chlorophenyl)-5,5-dicyano-4-(4-methoxyphenyl)-1,2,5,6-tetrahydropyridine-3-carboxylate (3h)**

Compound **3h** (54 mg, 66% yield, *R<sub>f</sub>* = 0.5 (PE/DCM = 1:1)) was isolated as a yellow solid; m.p. 132–133 °C.

**<sup>1</sup>H NMR** (400 MHz, CDCl<sub>3</sub>) δ 7.38–7.27 (m, 4H), 7.00 (d, *J* = 9.0 Hz, 2H), 6.96 (d, *J* = 8.72 Hz, 2H), 4.12 (s, 2H), 4.03 (s, 2H), 3.85 (s, 3H), 3.55 (s, 3H).

**<sup>13</sup>C NMR** (100 MHz, CDCl<sub>3</sub>) δ 165.8, 160.6, 146.5, 134.1, 133.4, 129.7 (d, *J* = 1.4 Hz), 127.6, 127.0, 118.6, 114.3, 112.9, 56.2, 55.4, 52.6, 49.0, 39.3.

**HRMS** (ESI) *m/z*: [M + H]<sup>+</sup> Calcd for C<sub>22</sub>H<sub>19</sub>ClN<sub>3</sub>O<sub>3</sub> 408.1109, found 408.1110.

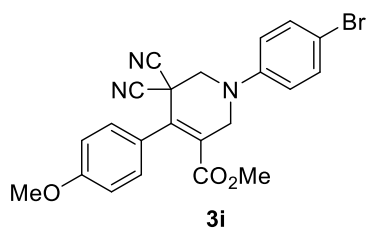

**Methyl 1-(4-bromophenyl)-5,5-dicyano-4-(4-methoxyphenyl)-1,2,5,6-tetrahydropyridine-3-carboxylate (3i)**

Compound **3i** (51 mg, 56% yield, *R<sub>f</sub>* = 0.6 (PE/DCM = 1:3)) was isolated as a yellow solid; m.p. 135–136 °C.

**<sup>1</sup>H NMR** (400 MHz, CDCl<sub>3</sub>) δ 7.49–7.42 (m, 2H), 7.33–7.27 (m, 2H), 7.01–6.90 (m, 4H), 4.12 (s, 2H), 4.03 (s, 2H), 3.85 (s, 3H), 3.55 (s, 3H).

$^{13}\text{C}$  NMR (100 MHz,  $\text{CDCl}_3$ )  $\delta$  165.8, 160.6, 147.0, 134.1, 133.3, 132.7, 129.7, 127.0, 118.9, 115.0, 114.3, 112.9, 56.1, 55.4, 52.6, 48.9, 39.3.

HRMS (ESI)  $m/z$ :  $[\text{M} + \text{H}]^+$  Calcd for  $\text{C}_{22}\text{H}_{19}\text{BrN}_3\text{O}_3$  452.0604, found 452.0606.

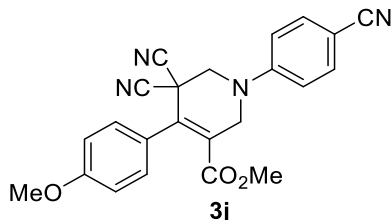

**Methyl 5,5-dicyano-1-(4-cyanophenyl)-4-(4-methoxyphenyl)-1,2,5,6-tetrahydropyridine-3-carboxylate (3j)**

Compound **3j** (34 mg, 43% yield,  $R_f = 0.6$  (PE/EA = 5:1)) was isolated as a yellow solid; m.p. 150–151 °C.

$^1\text{H}$  NMR (400 MHz,  $\text{CDCl}_3$ )  $\delta$  7.63 (d,  $J = 8.8$  Hz, 2H), 7.28 (d,  $J = 8.7$  Hz, 2H), 7.07 (d,  $J = 8.8$  Hz, 2H), 6.97 (d,  $J = 8.7$  Hz, 2H), 4.27 (s, 2H), 4.21 (s, 2H), 3.85 (s, 3H), 3.56 (s, 3H).

$^{13}\text{C}$  NMR (100 MHz,  $\text{CDCl}_3$ )  $\delta$  165.5, 160.8, 150.5, 134.6, 134.1, 132.5, 129.7, 126.7, 119.2, 115.5, 114.4, 112.5, 104.1, 55.4, 54.0, 52.8, 47.6, 38.9.

HRMS (ESI)  $m/z$ :  $[\text{M} + \text{H}]^+$  Calcd for  $\text{C}_{23}\text{H}_{19}\text{N}_4\text{O}_3$  399.1452, found 399.1453.

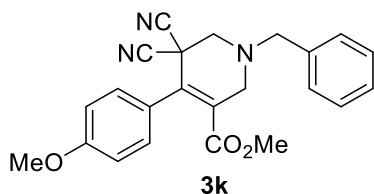

**Methyl 1-benzyl-5,5-dicyano-4-(4-methoxyphenyl)-1,2,5,6-tetrahydropyridine-3-carboxylate (3k)**

Compound **3k** (39 mg, 50% yield,  $R_f = 0.5$  (PE/EA = 5:1)) was isolated as a yellow oil.

$^1\text{H}$  NMR (400 MHz,  $\text{CDCl}_3$ )  $\delta$  7.44–7.33 (m, 5H), 7.30–7.26 (m, 2H), 6.96–6.91 (m, 2H), 3.84 (s, 2H), 3.83 (s, 3H), 3.53 (s, 2H), 3.49 (s, 3H), 3.26 (s, 2H).

$^{13}\text{C}$  NMR (100 MHz,  $\text{CDCl}_3$ )  $\delta$  166.1, 160.4, 135.8, 134.0, 133.3, 129.8, 129.1, 128.9, 128.3, 127.2, 114.2, 113.3, 60.8, 56.6, 55.4, 52.7, 52.4, 39.4.

HRMS (ESI)  $m/z$ :  $[\text{M} + \text{H}]^+$  Calcd for  $\text{C}_{23}\text{H}_{22}\text{N}_3\text{O}_3$  388.1656, found 388.1654.

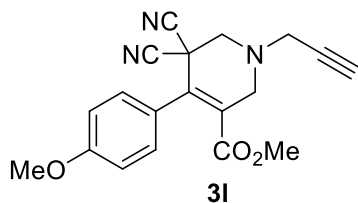

**Methyl 5,5-dicyano-4-(4-methoxyphenyl)-1-(prop-2-yn-1-yl)-1,2,5,6-tetrahydropyridine-3-carboxylate (3l)**

Compound **3l** (27 mg, 40% yield,  $R_f = 0.5$  (PE/EA = 5:1)) was isolated as a yellow solid; m.p. 105–106 °C.

$^1\text{H NMR}$  (400 MHz,  $\text{CDCl}_3$ )  $\delta$  7.27–7.23 (m, 2H), 6.95–6.89 (m, 2H), 3.82 (s, 3H), 3.65 (d,  $J = 2.4$  Hz, 2H), 3.60 (s, 2H), 3.49 (s, 3H), 3.35 (s, 2H), 2.37 (t,  $J = 2.4$  Hz, 1H).

$^{13}\text{C NMR}$  (100 MHz,  $\text{CDCl}_3$ )  $\delta$  165.8, 160.5, 133.9, 133.0, 129.9, 127.0, 114.2, 113.3, 76.1, 75.4, 56.4, 55.4, 52.4, 50.8, 45.5, 39.6.

**HRMS** (ESI)  $m/z$ :  $[\text{M} + \text{H}]^+$  Calcd for  $\text{C}_{19}\text{H}_{18}\text{N}_3\text{O}_3$  336.1343, found 336.1342.

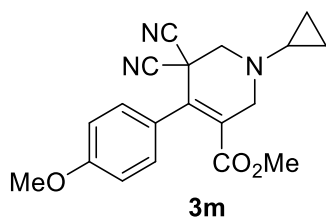

**Methyl 5,5-dicyano-1-cyclopropyl-4-(4-methoxyphenyl)-1,2,5,6-tetrahydropyridine-3-carboxylate (3m)**

Compound **3m** (34 mg, 50% yield,  $R_f = 0.5$  (PE/EA = 5:1)) was isolated as a yellow oil.

$^1\text{H NMR}$  (400 MHz,  $\text{CDCl}_3$ )  $\delta$  7.29–7.23 (m, 2H), 6.93 (d,  $J = 8.8$  Hz, 2H), 3.83 (s, 3H), 3.63 (s, 2H), 3.51 (s, 3H), 3.47 (s, 2H), 2.07–1.99 (m, 1H), 0.67–0.58 (m, 4H).

$^{13}\text{C NMR}$  (100 MHz,  $\text{CDCl}_3$ )  $\delta$  166.1, 160.4, 134.3, 133.0, 129.8, 127.4, 114.2, 113.4, 58.0, 55.4, 52.4, 52.3, 39.3, 36.5, 6.9.

**HRMS** (ESI)  $m/z$ :  $[\text{M} + \text{H}]^+$  Calcd for  $\text{C}_{19}\text{H}_{20}\text{N}_3\text{O}_3$  338.1499, found 338.1499.

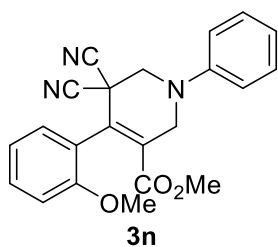

**Methyl 5,5-dicyano-4-(2-methoxyphenyl)-1-phenyl-1,2,5,6-tetrahydropyridine-3-carboxylate (3n)**

Compound **3n** (40 mg, 54% yield,  $R_f = 0.4$  (PE/EA = 5:1)) was isolated as a yellow solid; m.p. 103–104 °C.

$^1\text{H NMR}$  (400 MHz,  $\text{CDCl}_3$ )  $\delta$  7.46–7.40 (m, 1H), 7.40–7.35 (m, 2H), 7.23 (dd,  $J = 7.5$ , 1.7 Hz, 1H), 7.11–7.06 (m, 2H), 7.03 (td,  $J = 7.5$ , 1.0 Hz, 2H), 6.99 (d,  $J = 8.3$  Hz, 1H), 4.23 (br s, 2H), 4.07 (br s, 2H), 3.85 (s, 3H), 3.54 (s, 3H).

$^{13}\text{C NMR}$  (100 MHz,  $\text{CDCl}_3$ )  $\delta$  165.3, 156.6, 148.1, 133.7, 133.3, 131.3, 129.7, 129.6, 124.3, 122.1, 120.9, 117.0, 113.2, 111.1, 55.8, 55.6, 52.4, 48.8, 39.3.

**HRMS** (ESI)  $m/z$ :  $[\text{M} + \text{H}]^+$  Calcd for  $\text{C}_{22}\text{H}_{20}\text{N}_3\text{O}_3$  374.1499, found 374.1499.

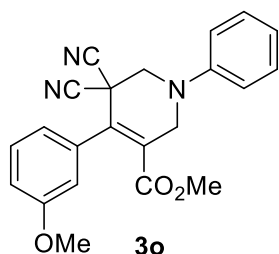

**Methyl 5,5-dicyano-4-(3-methoxyphenyl)-1-phenyl-1,2,5,6-tetrahydropyridine-3-carboxylate (3o)**

Compound **3o** (39 mg, 52% yield,  $R_f = 0.4$  (PE/EA = 5:1)) was isolated as a yellow solid; m.p. 102–103 °C.

$^1\text{H NMR}$  (400 MHz,  $\text{CDCl}_3$ )  $\delta$  7.41–7.32 (m, 3H), 7.10–7.02 (m, 3H), 7.01–6.97 (m, 1H), 6.97–6.91 (m, 2H), 4.17 (s, 2H), 4.07 (s, 2H), 3.84 (s, 3H), 3.55 (s, 3H).

$^{13}\text{C NMR}$  (100 MHz,  $\text{CDCl}_3$ )  $\delta$  165.7, 159.8, 147.9, 136.2, 134.0, 133.9, 130.0, 129.8, 122.6, 120.7, 117.4, 115.5, 113.7, 113.0, 56.5, 55.5, 52.6, 49.0, 39.1.

**HRMS** (ESI)  $m/z$ :  $[\text{M} + \text{H}]^+$  Calcd for  $\text{C}_{22}\text{H}_{20}\text{N}_3\text{O}_3$  374.1499, found 374.1499.

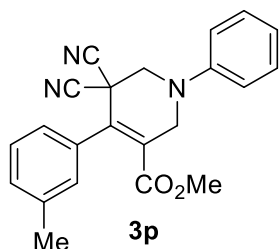

**Methyl 5,5-dicyano-1-phenyl-4-(m-tolyl)-1,2,5,6-tetrahydropyridine-3-carboxylate (3p)**

Compound **3p** (41 mg, 57% yield,  $R_f = 0.5$  (PE/DCM = 1:1)) was isolated as a yellow solid; m.p. 128–129 °C.

$^1\text{H NMR}$  (400 MHz,  $\text{CDCl}_3$ )  $\delta$  7.40–7.35 (m, 2H), 7.33 (d,  $J = 7.5$  Hz, 1H), 7.30–7.23 (m, 2H), 7.21–7.14 (m, 2H), 7.10–7.02 (m, 2H), 4.17 (s, 2H), 4.07 (s, 2H), 3.53 (s, 3H), 2.41 (s, 3H).

$^{13}\text{C NMR}$  (100 MHz,  $\text{CDCl}_3$ )  $\delta$  165.8, 148.0, 138.6, 135.0, 134.4, 133.6, 130.5, 129.8, 128.7, 128.7, 125.5, 122.5, 117.4, 112.9, 56.5, 52.5, 49.0, 39.2, 21.6.

**HRMS** (ESI)  $m/z$ :  $[\text{M} + \text{H}]^+$  Calcd for  $\text{C}_{22}\text{H}_{20}\text{N}_3\text{O}_2$  358.1550, found 358.1550.

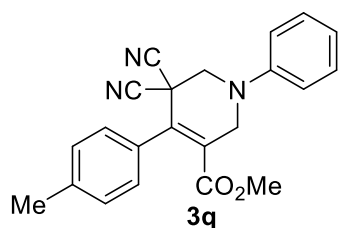

**Methyl 5,5-dicyano-1-phenyl-4-(p-tolyl)-1,2,5,6-tetrahydropyridine-3-carboxylate (3q)**

Compound **3q** (45 mg, 63% yield,  $R_f = 0.4$  (PE/EA = 5:1)) was isolated as a yellow solid; m.p. 130–131 °C.

$^1\text{H NMR}$  (400 MHz,  $\text{CDCl}_3$ )  $\delta$  7.42–7.31 (m, 2H), 7.29–7.23 (m, 4H), 7.10–7.01 (m, 3H), 4.16 (s, 2H), 4.06 (s, 2H), 3.54 (s, 3H), 2.40 (s, 3H).

$^{13}\text{C NMR}$  (100 MHz,  $\text{CDCl}_3$ )  $\delta$  165.7, 148.0, 139.7, 134.4, 133.5, 132.1, 129.8, 129.6, 128.2, 122.5, 117.4, 113.0, 56.3, 52.5, 49.0, 39.3, 21.5.

**HRMS** (ESI)  $m/z$ :  $[\text{M} + \text{H}]^+$  Calcd for  $\text{C}_{22}\text{H}_{20}\text{N}_3\text{O}_2$  358.1550, found 358.1550.

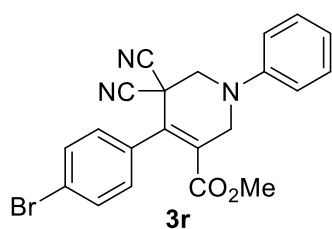

**Methyl 4-(4-bromophenyl)-5,5-dicyano-1-phenyl-1,2,5,6-tetrahydropyridine-3-carboxylate (3r)**

Compound **3r** (39 mg, 46% yield,  $R_f = 0.5$  (PE/EA = 5:1)) was isolated as a yellow solid; m.p. 136–137 °C.

$^1\text{H NMR}$  (400 MHz,  $\text{CDCl}_3$ )  $\delta$  7.63–7.58 (m, 2H), 7.40–7.34 (m, 2H), 7.27–7.26 (m, 1H), , 7.25–7.23 (m, 1H), 7.10 – 7.03 (m, 3H), 4.17 (s, 2H), 4.07 (s, 2H), 3.56 (s, 3H).

$^{13}\text{C}$  NMR (100 MHz,  $\text{CDCl}_3$ )  $\delta$  165.2, 147.9, 134.4, 133.8, 133.5, 132.2, 130.1, 129.9, 124.3, 122.8, 117.5, 112.7, 56.4, 52.7, 49.1, 39.1.

HRMS (ESI)  $m/z$ :  $[\text{M} + \text{H}]^+$  Calcd for  $\text{C}_{21}\text{H}_{17}\text{BrN}_3\text{O}_2$  422.0499, found 422.0500.

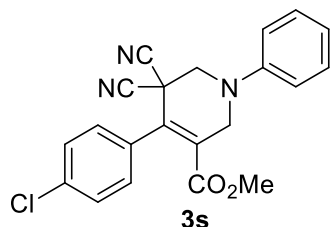

**Methyl 4-(4-chlorophenyl)-5,5-dicyano-1-phenyl-1,2,5,6-tetrahydropyridine-3-carboxylate (3s)**

Compound **3s** (39 mg, 52% yield,  $R_f = 0.7$  (PE/EA = 5:1)) was isolated as a yellow solid; mp 133–134 °C.

$^1\text{H}$  NMR (400 MHz,  $\text{CDCl}_3$ )  $\delta$  7.45 (d,  $J = 8.4$  Hz, 2H), 7.41–7.29 (m, 4H), 7.12–7.03 (m, 3H), 4.17 (s, 2H), 4.07 (s, 2H), 3.56 (s, 3H).

$^{13}\text{C}$  NMR (100 MHz,  $\text{CDCl}_3$ )  $\delta$  165.2, 147.8, 136.0, 134.5, 133.5, 133.3, 129.8, 129.2, 122.7, 117.5, 112.7, 56.4, 52.7, 49.1, 39.1.

HRMS (ESI)  $m/z$ :  $[\text{M} + \text{H}]^+$  Calcd for  $\text{C}_{21}\text{H}_{17}\text{ClN}_3\text{O}_2$  378.1004; Found 378.1001.

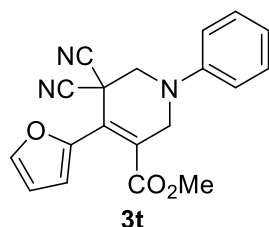

**Methyl 5,5-dicyano-4-(furan-2-yl)-1-phenyl-1,2,5,6-tetrahydropyridine-3-carboxylate (3t)**

Compound **3t** (33 mg, 49% yield,  $R_f = 0.5$  (PE/EA = 5:1)) was isolated as a yellow solid; m.p. 85–86 °C.

$^1\text{H}$  NMR (400 MHz,  $\text{CDCl}_3$ )  $\delta$  7.54 (d,  $J = 1.7$  Hz, 1H), 7.39–7.33 (m, 2H), 7.08–7.02 (m, 3H), 6.88 (d,  $J = 3.6$  Hz, 1H), 6.53 (dd,  $J = 3.6, 1.8$  Hz, 1H), 4.14 (s, 2H), 4.09 (s, 2H), 3.82 (s, 3H).

$^{13}\text{C}$  NMR (100 MHz,  $\text{CDCl}_3$ )  $\delta$  166.8, 147.6, 146.6, 144.5, 132.4, 129.8, 122.8, 121.0, 117.6, 113.3, 112.5, 112.1, 56.9, 53.0, 49.5, 35.0.

HRMS (ESI)  $m/z$ :  $[\text{M} + \text{H}]^+$  Calcd for  $\text{C}_{19}\text{H}_{16}\text{N}_3\text{O}_3$  334.1186, found 334.1185.

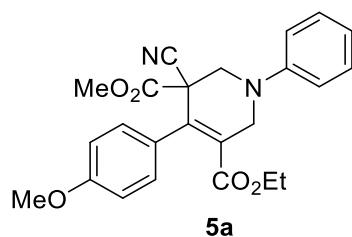

**5-Ethyl 3-methyl 3-cyano-4-(4-methoxyphenyl)-1-phenyl-1,2,3,6-tetrahydropyridine-3,5-dicarboxylate (5a)**

Compound **5a** (62 mg, 74% yield,  $R_f = 0.5$  (PE/EA = 5:1)) was isolated as a yellow oil.

$^1\text{H NMR}$  (400 MHz,  $\text{CDCl}_3$ )  $\delta$  7.34–7.30 (m, 2H), 7.22 (dt,  $J = 9.6, 2.8$  Hz, 2H), 7.04–6.99 (m, 2H), 6.99–6.93 (m, 1H), 6.87 (dt,  $J = 9.6, 2.8$  Hz, 2H), 4.14 (d,  $J = 6.3$  Hz, 2H), 4.06 (d,  $J = 12.6$  Hz, 1H), 4.00–3.93 (m, 3H), 3.81 (s, 3H), 3.64 (s, 3H), 0.92 (t,  $J = 7.1$  Hz, 3H).

$^{13}\text{C NMR}$  (100 MHz,  $\text{CDCl}_3$ )  $\delta$  166.4, 166.0, 159.8, 148.6, 136.8, 132.7, 129.9, 129.5, 128.8, 121.2, 116.7, 116.5, 113.6, 61.2, 55.4, 55.3, 53.9, 51.6, 48.9, 13.7.

**HRMS** (ESI)  $m/z$ :  $[\text{M} + \text{H}]^+$  Calcd for  $\text{C}_{24}\text{H}_{25}\text{N}_2\text{O}_5$  421.1758, found 421.1763.

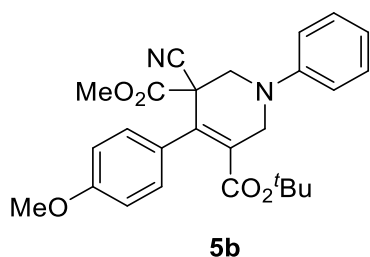

**5-(tert-Butyl) 3-methyl 3-cyano-4-(4-methoxyphenyl)-1-phenyl-1,2,3,6-tetrahydropyridine-3,5-dicarboxylate (5b)**

Compound **5b** (56 mg, 62% yield,  $R_f = 0.5$  (PE/EA = 5:1)) was isolated as a yellow oil.

$^1\text{H NMR}$  (400 MHz,  $\text{CDCl}_3$ )  $\delta$  7.35–7.30 (m, 2H), 7.22 (dt,  $J = 9.6, 3.2$  Hz, 2H), 7.04–6.99 (m, 2H), 6.97–6.92 (m, 1H), 6.88 (dt,  $J = 9.6, 2.8$  Hz, 2H), 4.10 (d,  $J = 3.9$  Hz, 2H), 4.06 (d,  $J = 12.7$  Hz, 1H), 3.94 (d,  $J = 12.6$  Hz, 1H), 3.82 (s, 3H), 3.63 (s, 3H), 1.16 (s, 9H).

$^{13}\text{C NMR}$  (100 MHz,  $\text{CDCl}_3$ )  $\delta$  166.1, 165.8, 159.8, 148.8, 135.1, 134.2, 130.2, 129.6, 129.0, 121.1, 117.0, 116.5, 113.6, 82.4, 55.5, 55.4, 53.9, 51.6, 48.9, 27.7.

**HRMS** (ESI)  $m/z$ :  $[\text{M} + \text{H}]^+$  Calcd for  $\text{C}_{26}\text{H}_{29}\text{N}_2\text{O}_5$  449.2071, found 449.2076.

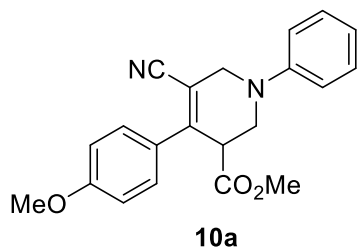

**Methyl 5-cyano-4-(4-methoxyphenyl)-1-phenyl-1,2,3,6-tetrahydropyridine-3-carboxylate (10a)**

Compound **10a** (43 mg, 48% yield,  $R_f = 0.8$  (DCM/EA = 2.5:1)) was isolated as a yellow solid; m.p. 84–85 °C.

**$^1\text{H}$  NMR** (400 MHz,  $\text{CDCl}_3$ )  $\delta$  7.41 (dt,  $J = 9.6, 3.0$  Hz, 2H), 7.35–7.28 (m, 2H), 6.99–6.89 (m, 5H), 4.21–4.12 (m, 2H), 3.89 (dd,  $J = 16.8, 2.2$  Hz, 1H), 3.86–3.80 (m, 4H), 3.58 (s, 3H), 3.44 (dd,  $J = 12.8, 3.8$  Hz, 1H).

**$^{13}\text{C}$  NMR** (100 MHz,  $\text{CDCl}_3$ )  $\delta$  171.0, 160.7, 150.7, 148.9, 129.9, 129.6, 129.1, 120.7, 117.9, 116.0, 114.3, 108.4, 55.5, 52.7, 49.9, 47.2.

**HRMS** (ESI)  $m/z$ :  $[\text{M} + \text{H}]^+$  Calcd for  $\text{C}_{21}\text{H}_{21}\text{N}_2\text{O}_3$  349.1547; Found 349.1544.



## 8. X-ray Crystallographic Structure and Data of 3a and 10a

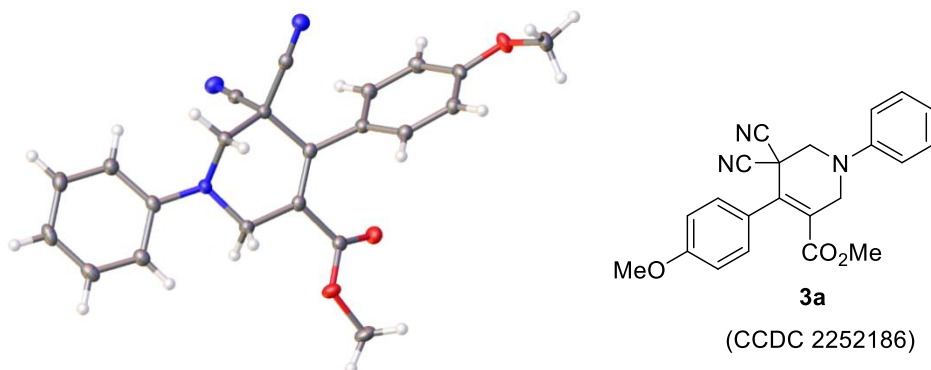

**Table S1.** Crystal data and structure refinement for compound **3a**

|                                    |                                                               |
|------------------------------------|---------------------------------------------------------------|
| Identification code                | <b>3a</b>                                                     |
| Empirical formula                  | C <sub>22</sub> H <sub>19</sub> N <sub>3</sub> O <sub>3</sub> |
| Formula weight                     | 373.40                                                        |
| Temperature/K                      | 100.0(2)                                                      |
| Crystal system                     | triclinic                                                     |
| Space group                        | P-1                                                           |
| a/Å                                | 8.5755(4)                                                     |
| b/Å                                | 9.8662(5)                                                     |
| c/Å                                | 11.7817(6)                                                    |
| α/°                                | 94.9180(10)                                                   |
| β/°                                | 108.5270(10)                                                  |
| γ/°                                | 90.4850(10)                                                   |
| Volume/Å <sup>3</sup>              | 941.01(8)                                                     |
| Z                                  | 2                                                             |
| ρ <sub>calc</sub> /cm <sup>3</sup> | 1.318                                                         |
| μ/mm <sup>-1</sup>                 | 0.463                                                         |
| F(000)                             | 392.0                                                         |
| Crystal size/mm <sup>3</sup>       | 0.22 × 0.18 × 0.16                                            |
| Radiation                          | GaKα (λ = 1.34138)                                            |
| 2θ range for data collection/°     | 6.914 to 114.198                                              |
| Index ranges                       | -10 ≤ h ≤ 10, -12 ≤ k ≤ 12, -14 ≤ l ≤ 14                      |
| Reflections collected              | 21965                                                         |
| Independent reflections            | 3838 [R <sub>int</sub> = 0.0756, R <sub>sigma</sub> = 0.0726] |
| Data/restraints/parameters         | 3838/0/256                                                    |

|                                                |                                  |
|------------------------------------------------|----------------------------------|
| Goodness-of-fit on $F^2$                       | 1.097                            |
| Final R indexes [ $I \geq 2\sigma(I)$ ]        | $R_1 = 0.0337$ , $wR_2 = 0.0987$ |
| Final R indexes [all data]                     | $R_1 = 0.0727$ , $wR_2 = 0.1024$ |
| Largest diff. peak/hole / $e \text{ \AA}^{-3}$ | 0.38/-0.21                       |

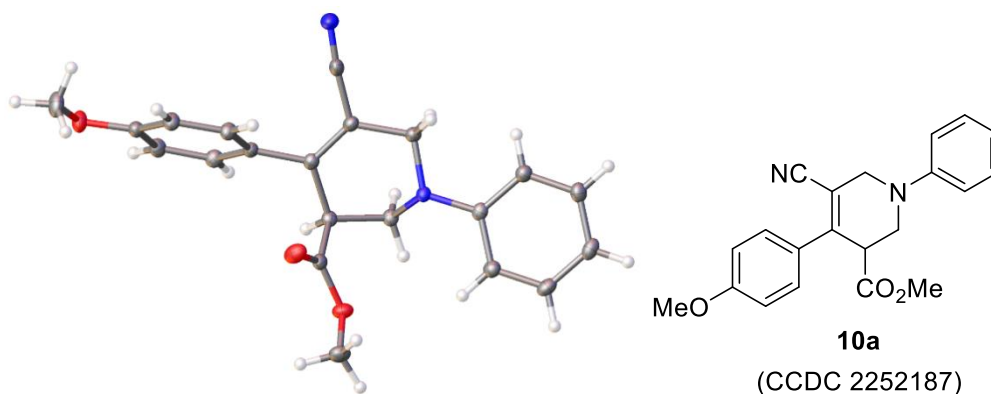

**Table S2.** Crystal data and structure refinement for compound **10a**

|                                               |                                      |
|-----------------------------------------------|--------------------------------------|
| Identification code                           | <b>10a</b>                           |
| Empirical formula                             | $C_{21}H_{20}N_2O_3$                 |
| Formula weight                                | 348.39                               |
| Temperature/K                                 | 100.0(2)                             |
| Crystal system                                | monoclinic                           |
| Space group                                   | Cc                                   |
| $a/\text{\AA}$                                | 9.7031(7)                            |
| $b/\text{\AA}$                                | 10.4099(7)                           |
| $c/\text{\AA}$                                | 17.7960(10)                          |
| $\alpha/^\circ$                               | 90                                   |
| $\beta/^\circ$                                | 95.421(2)                            |
| $\gamma/^\circ$                               | 90                                   |
| Volume/ $\text{\AA}^3$                        | 1789.5(2)                            |
| Z                                             | 4                                    |
| $\rho_{\text{calc}}/\text{cm}^3$              | 1.293                                |
| $\mu/\text{mm}^{-1}$                          | 0.087                                |
| F(000)                                        | 736.0                                |
| Crystal size/ $\text{mm}^3$                   | 0.35 $\times$ 0.31 $\times$ 0.25     |
| Radiation                                     | MoK $\alpha$ ( $\lambda = 0.71073$ ) |
| $2\theta$ range for data collection/ $^\circ$ | 5.754 to 54.982                      |

|                                                |                                                               |
|------------------------------------------------|---------------------------------------------------------------|
| Index ranges                                   | $-12 \leq h \leq 12, -13 \leq k \leq 13, -22 \leq l \leq 23$  |
| Reflections collected                          | 21287                                                         |
| Independent reflections                        | 4095 [ $R_{\text{int}} = 0.0397, R_{\text{sigma}} = 0.0280$ ] |
| Data/restraints/parameters                     | 4095/2/238                                                    |
| Goodness-of-fit on $F^2$                       | 1.048                                                         |
| Final R indexes [ $I \geq 2\sigma(I)$ ]        | $R_1 = 0.0286, wR_2 = 0.0728$                                 |
| Final R indexes [all data]                     | $R_1 = 0.0303, wR_2 = 0.0740$                                 |
| Largest diff. peak/hole / $e \text{ \AA}^{-3}$ | 0.25/-0.15                                                    |
| Flack parameter                                | -0.4(2)                                                       |

# 9. $^1\text{H}$ , $^{13}\text{C}$ , and $^{19}\text{F}$ NMR Spectra of New Compounds

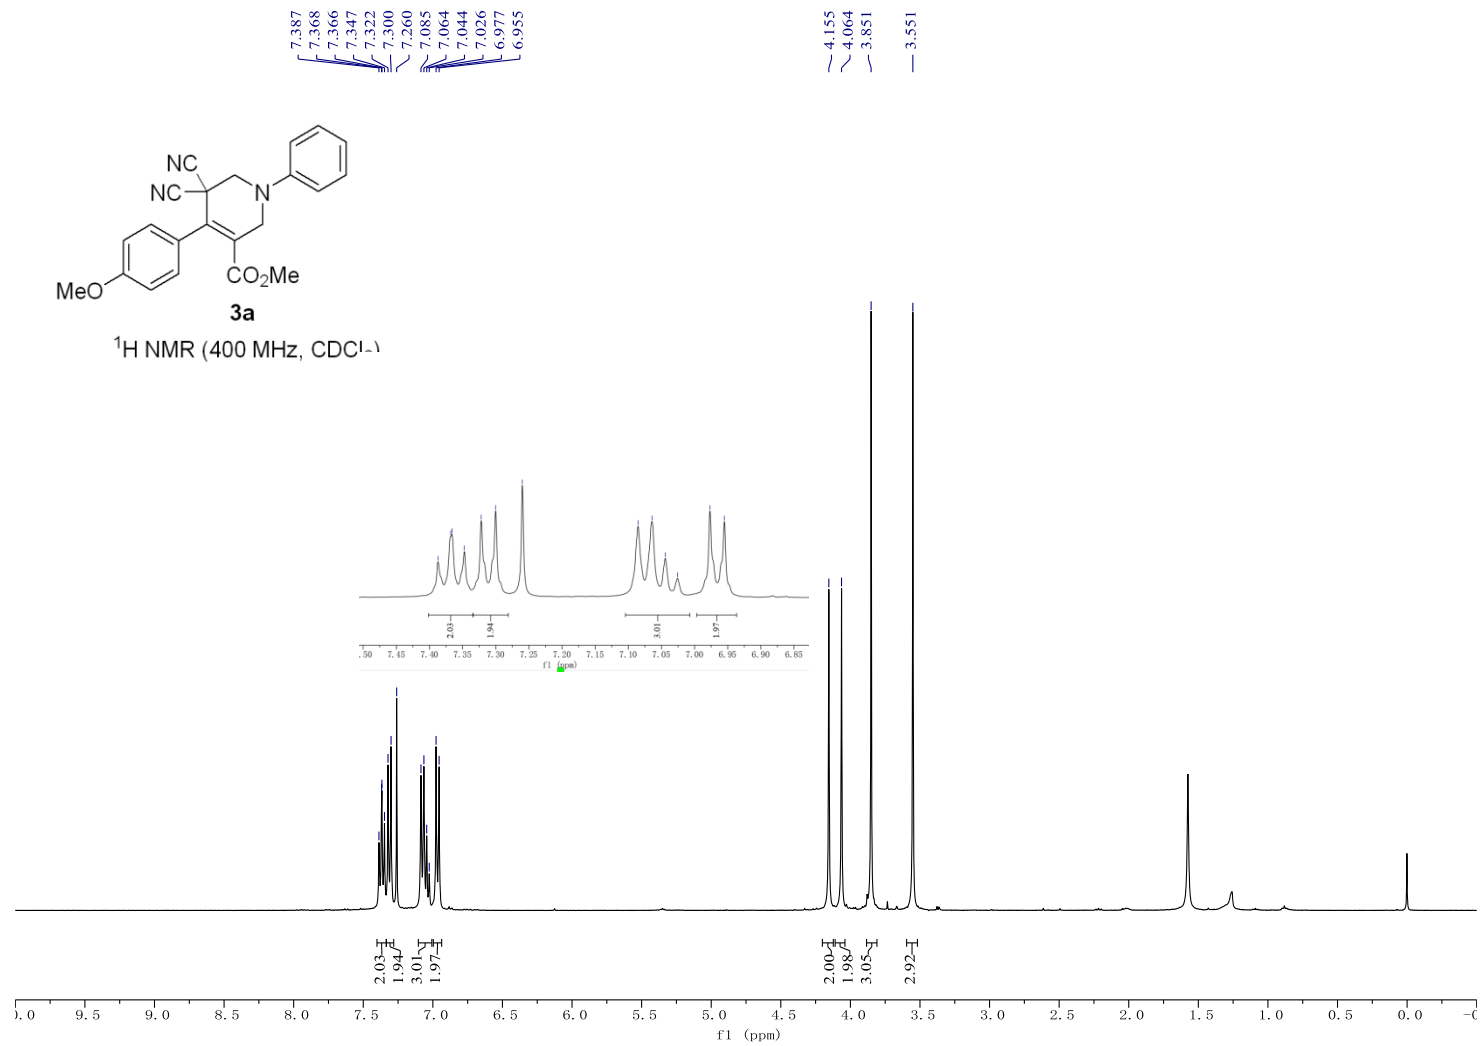

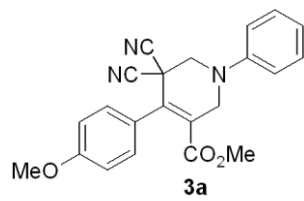

$^{13}\text{C}$  NMR (100 MHz,  $\text{CDCl}_3$ )

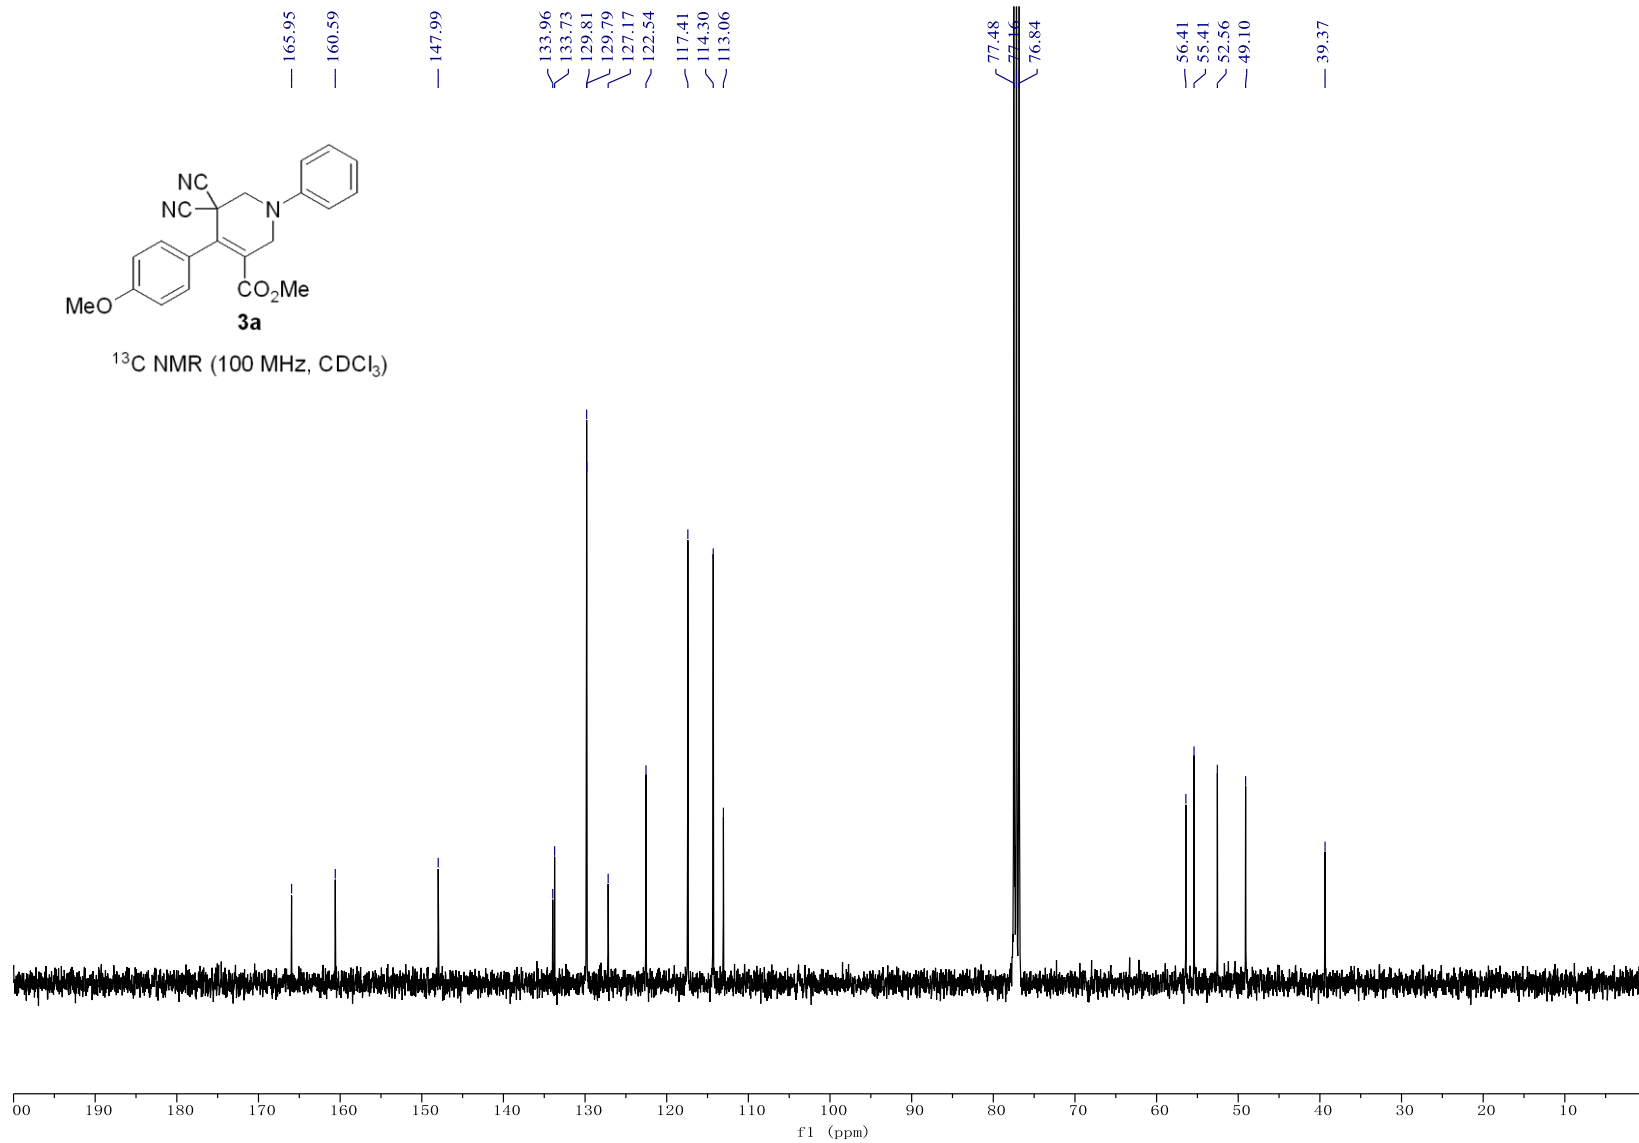

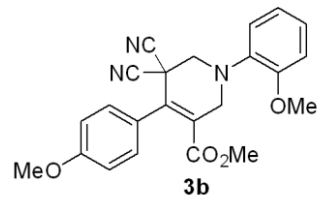

<sup>1</sup>H NMR (400 MHz, CDCl<sub>3</sub>)

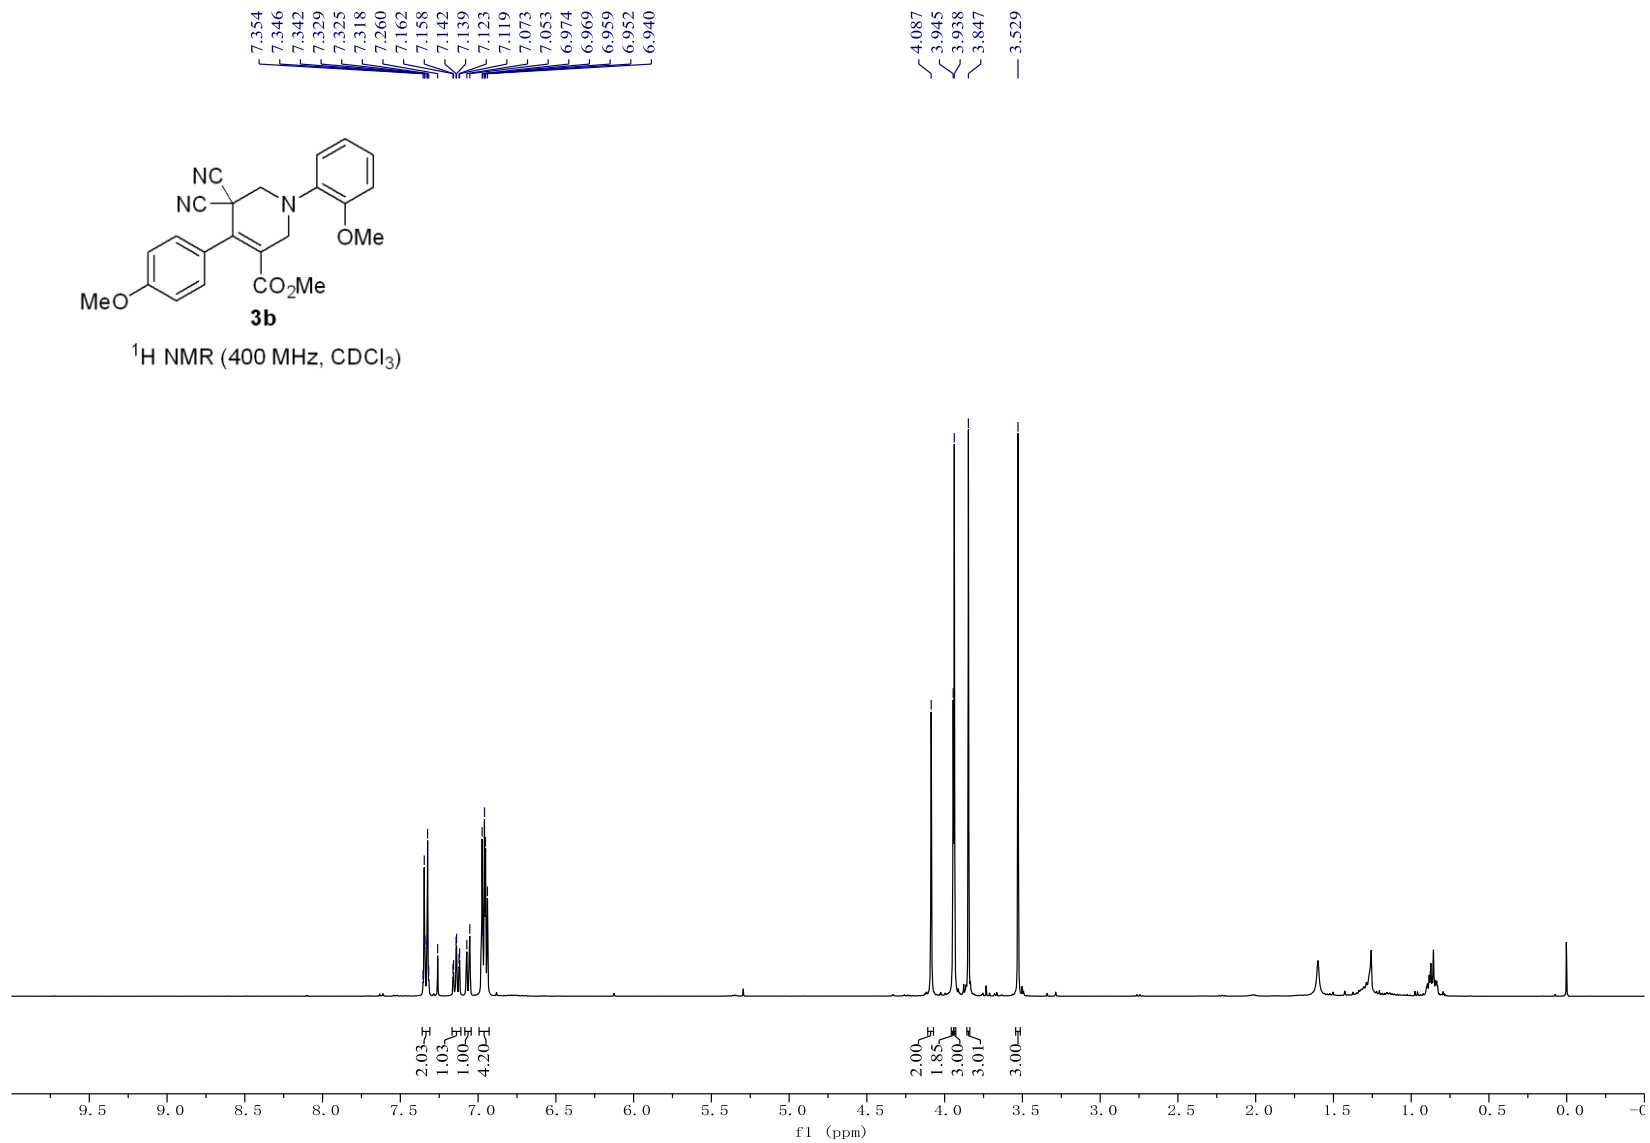

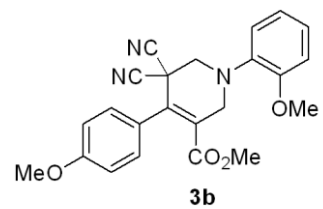

$^{13}\text{C}$  NMR (100 MHz,  $\text{CDCl}_3$ )

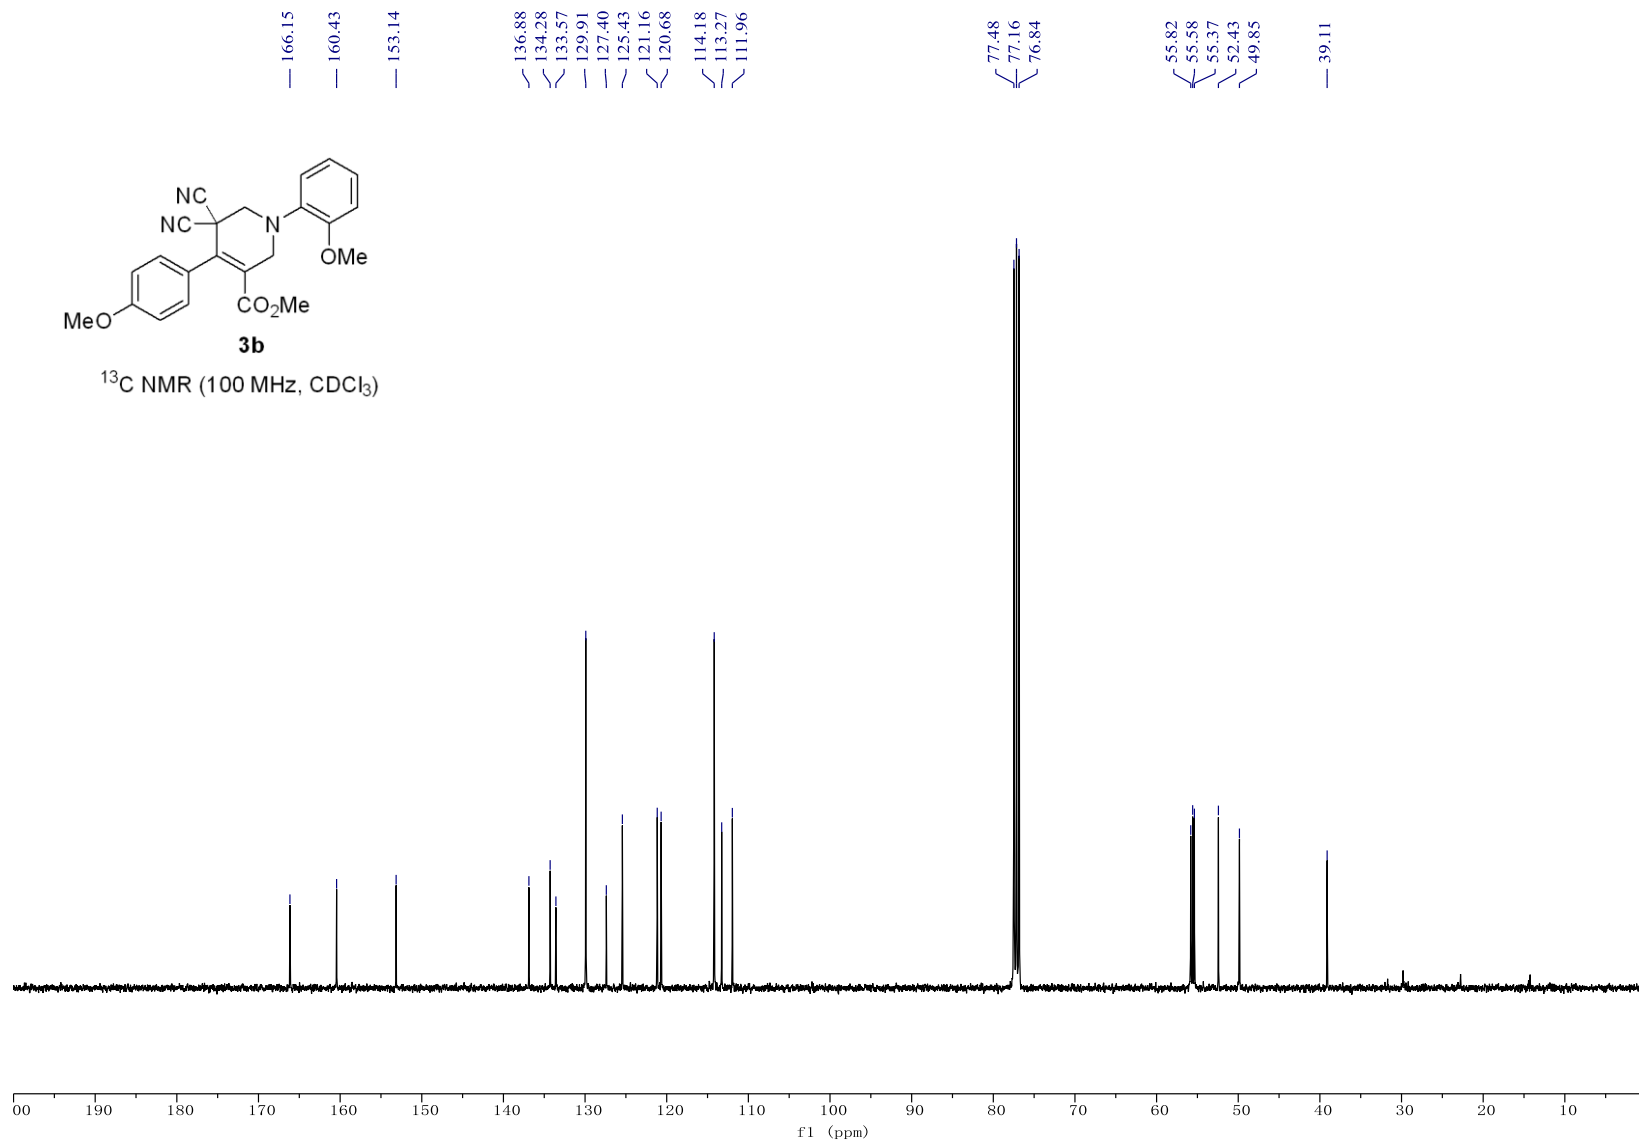

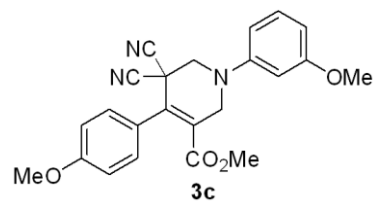

<sup>1</sup>H NMR (400 MHz, CDCl<sub>3</sub>)

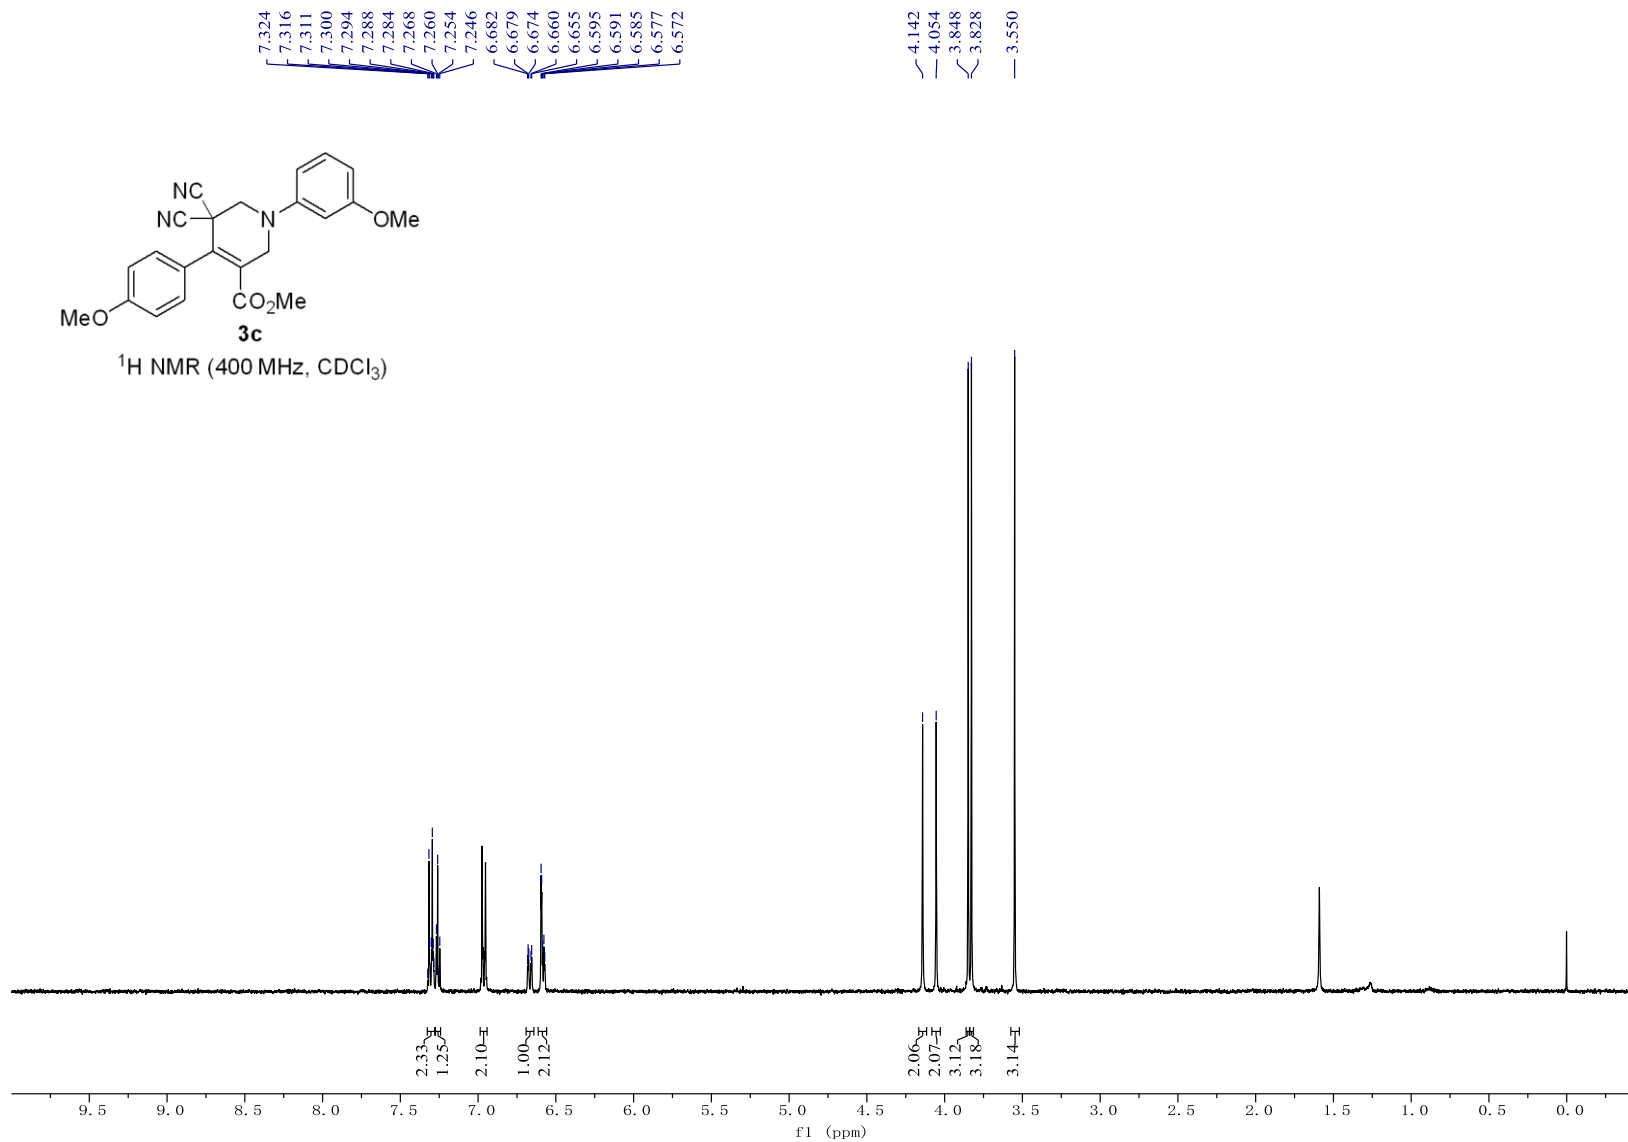



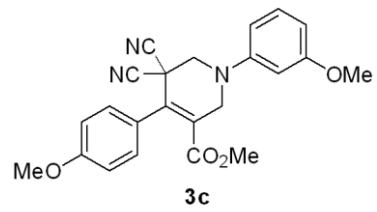

<sup>13</sup>C NMR (100 MHz, CDCl<sub>3</sub>)

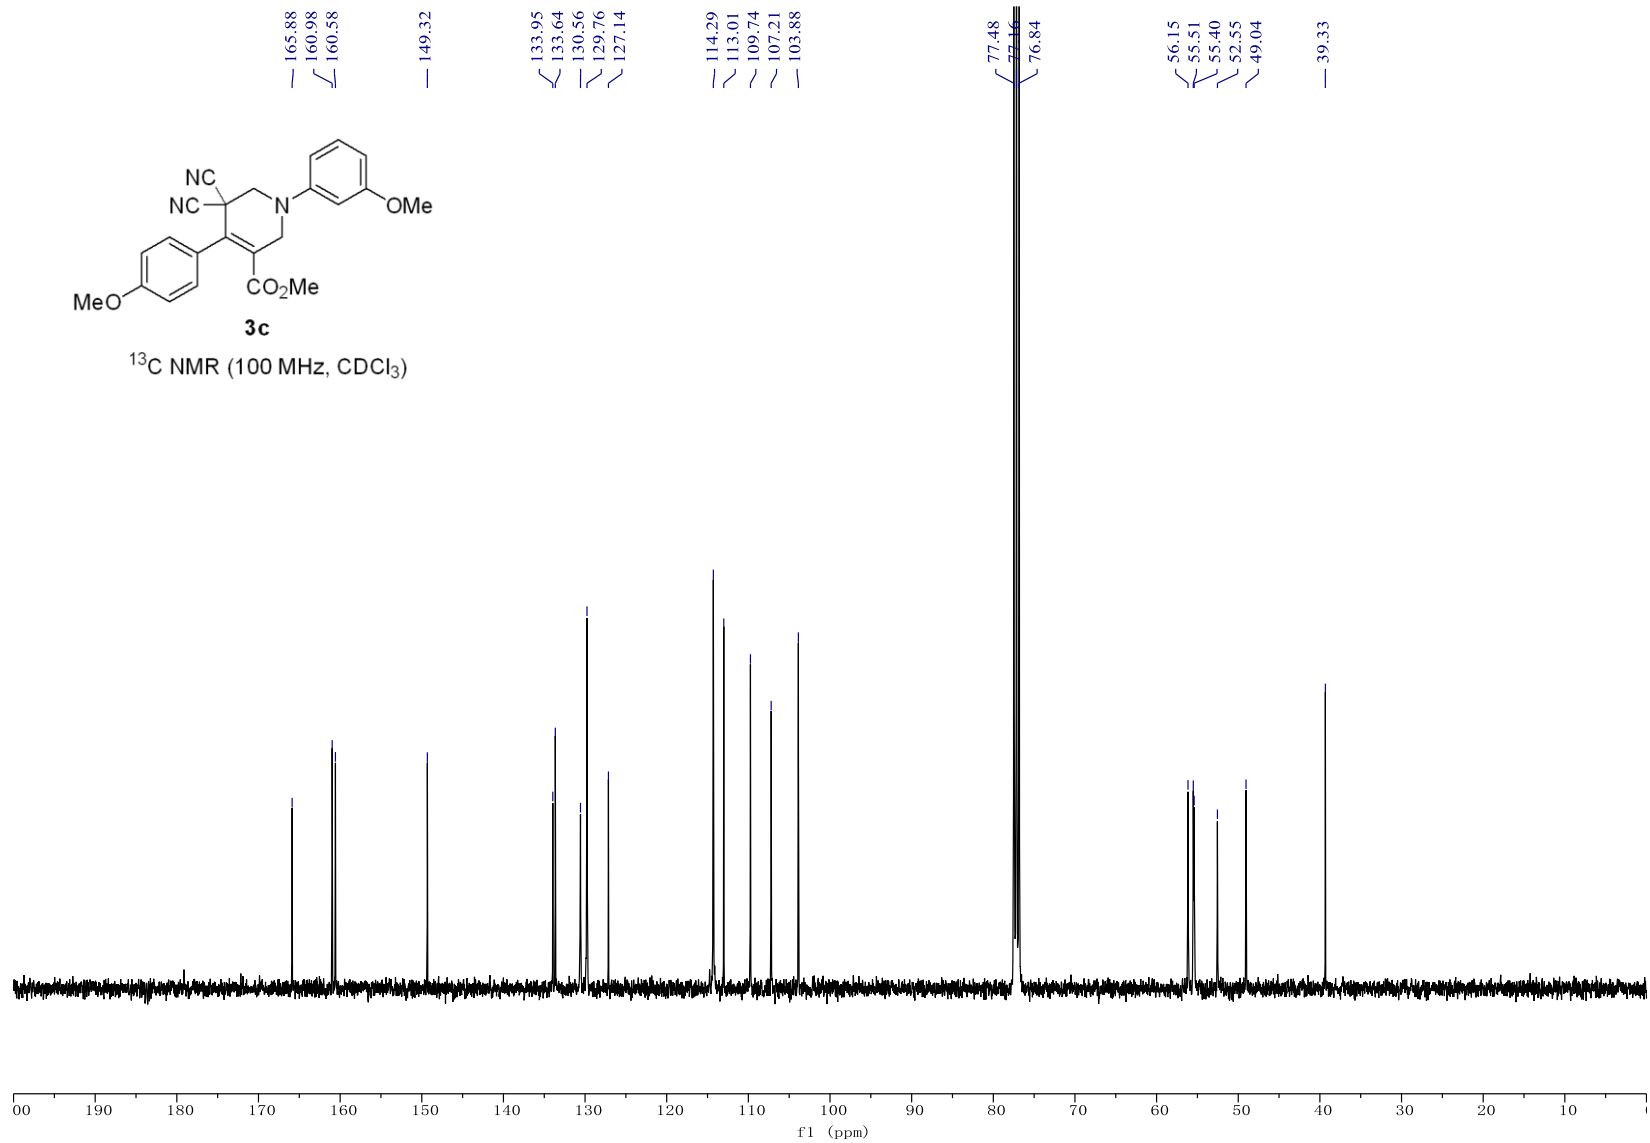

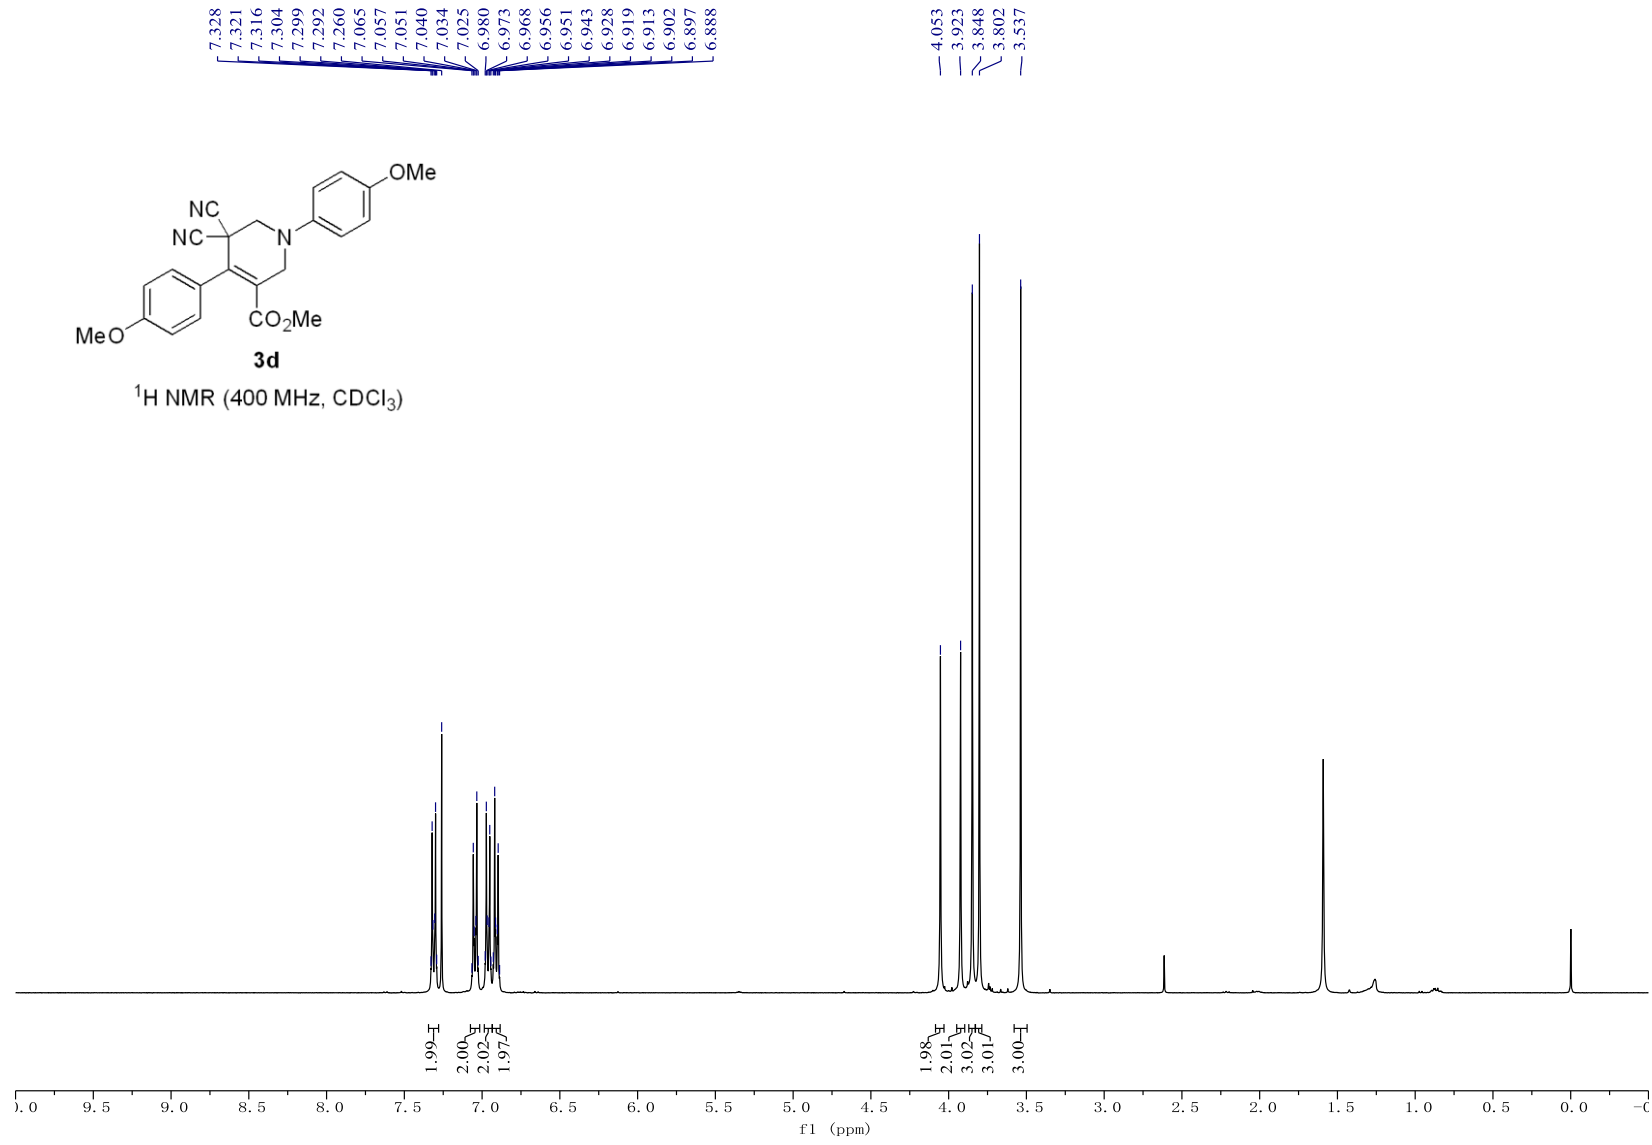

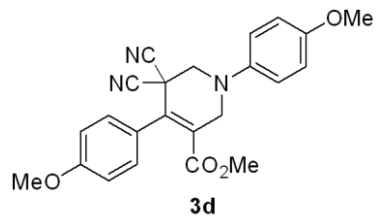

$^{13}\text{C}$  NMR (100 MHz,  $\text{CDCl}_3$ )

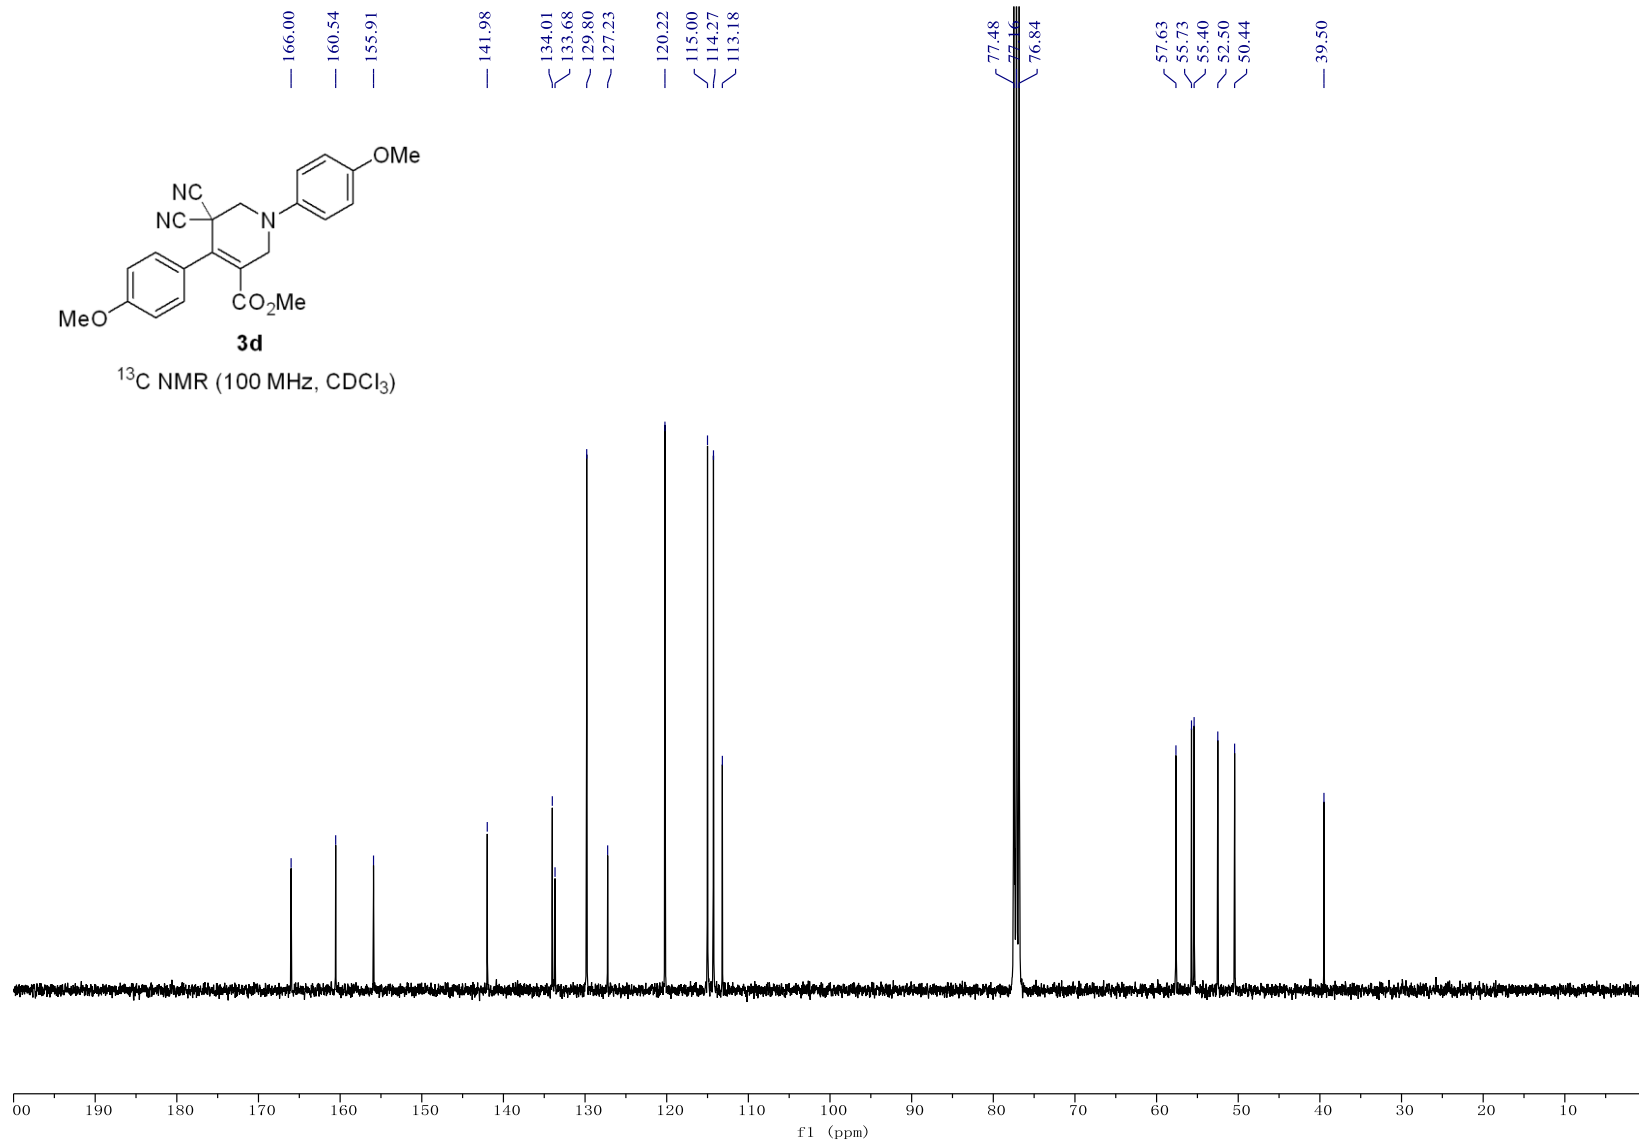

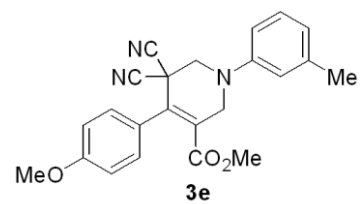

<sup>1</sup>H NMR (400 MHz, CDCl<sub>3</sub>)

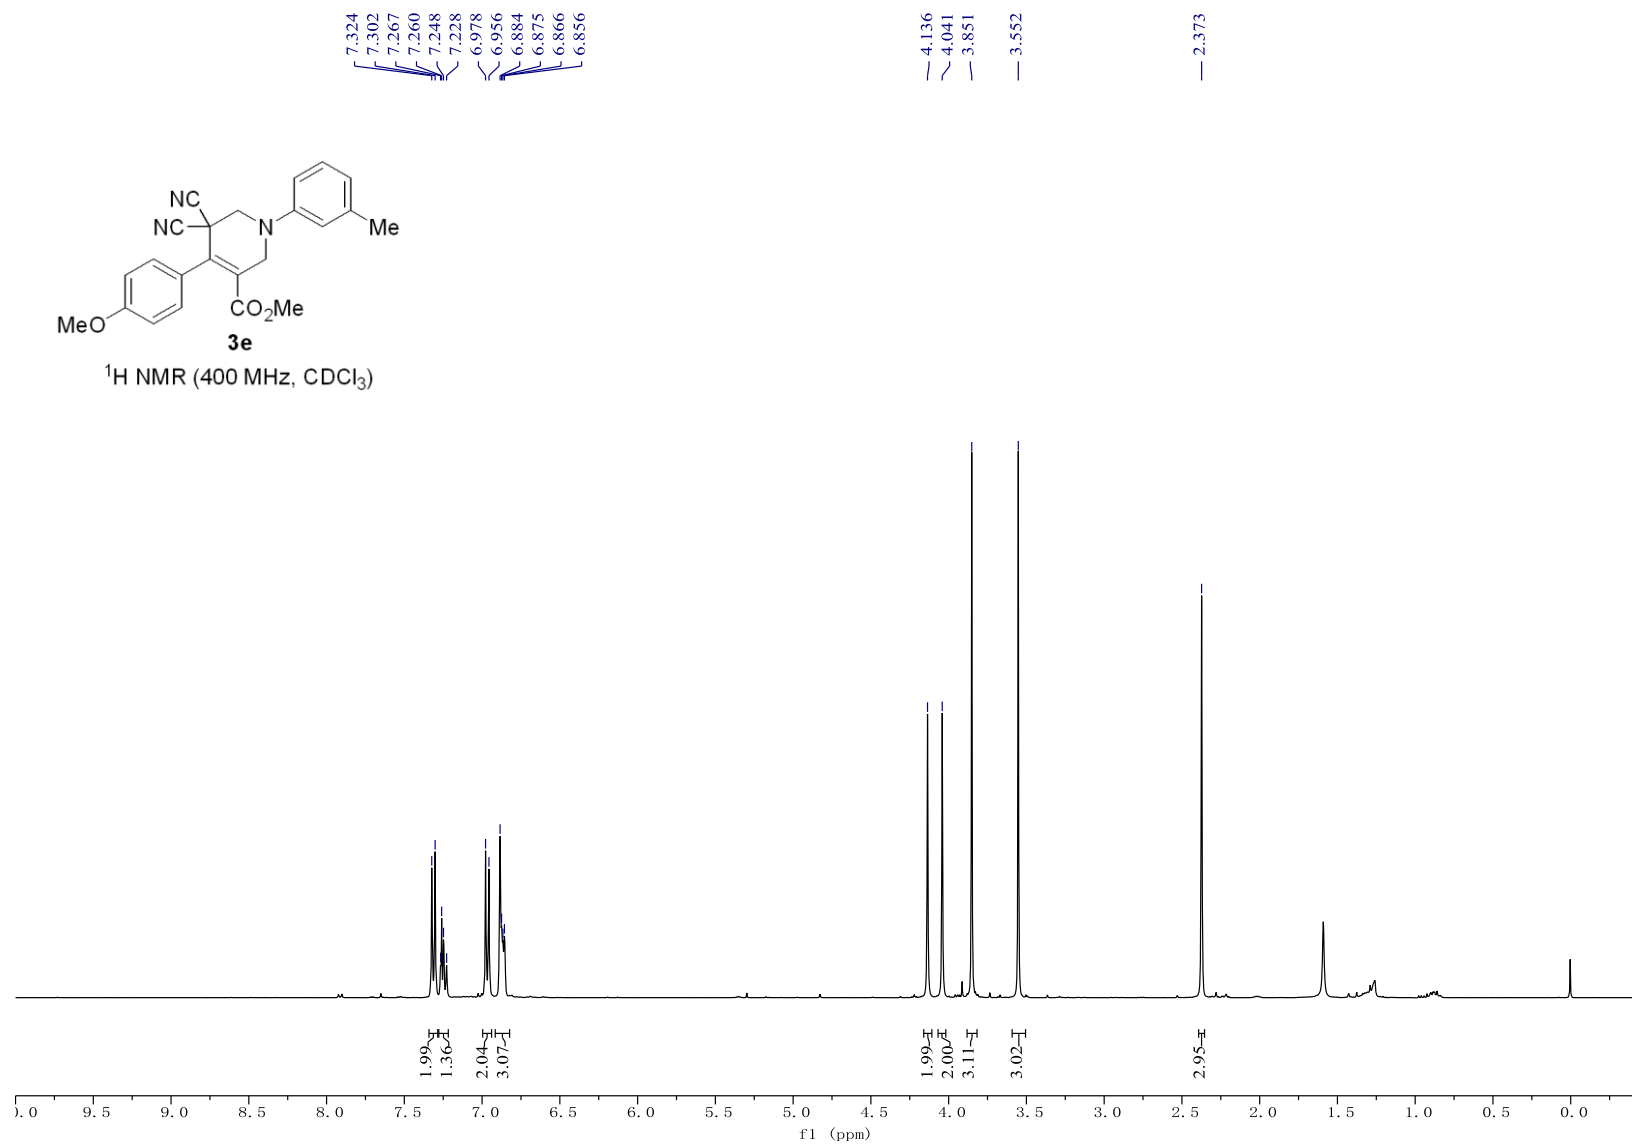

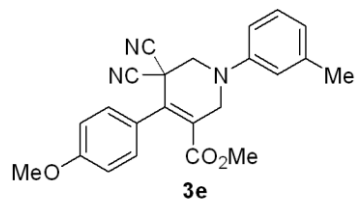

$^{13}\text{C}$  NMR (100 MHz,  $\text{CDCl}_3$ )

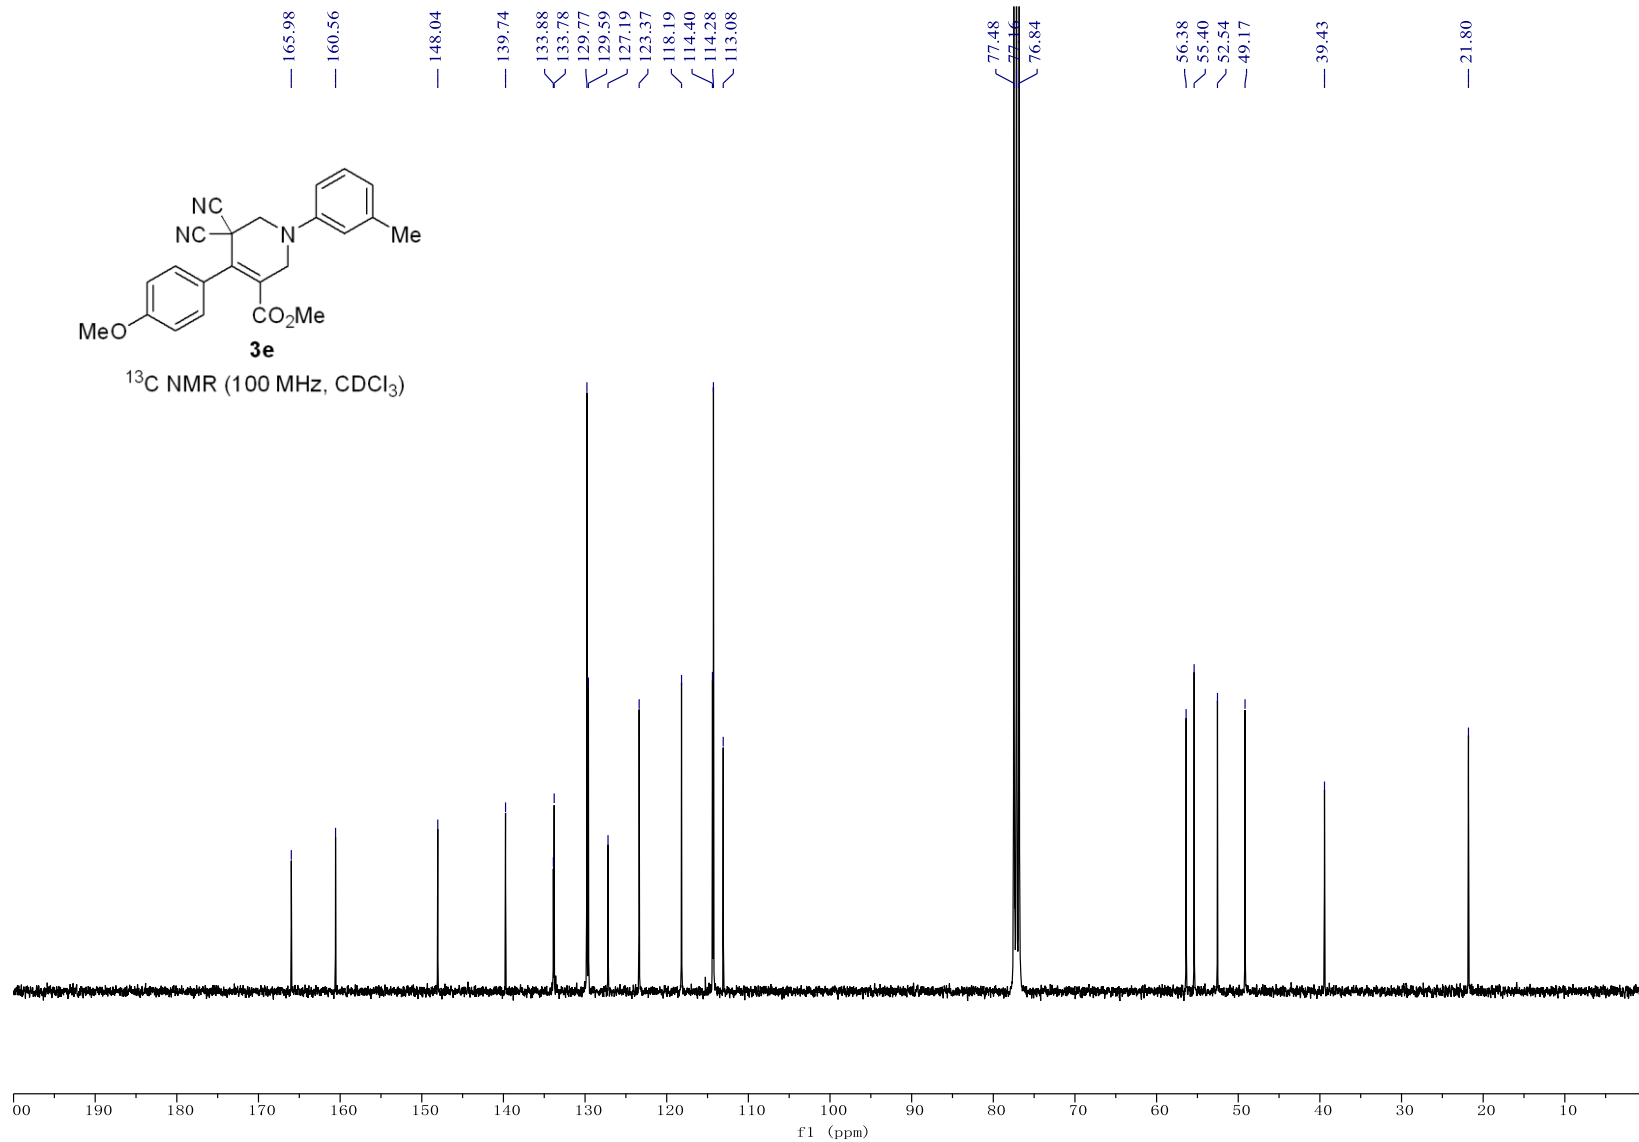

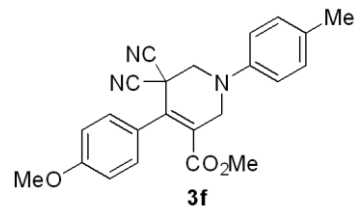

<sup>1</sup>H NMR (400 MHz, CDCl<sub>3</sub>)

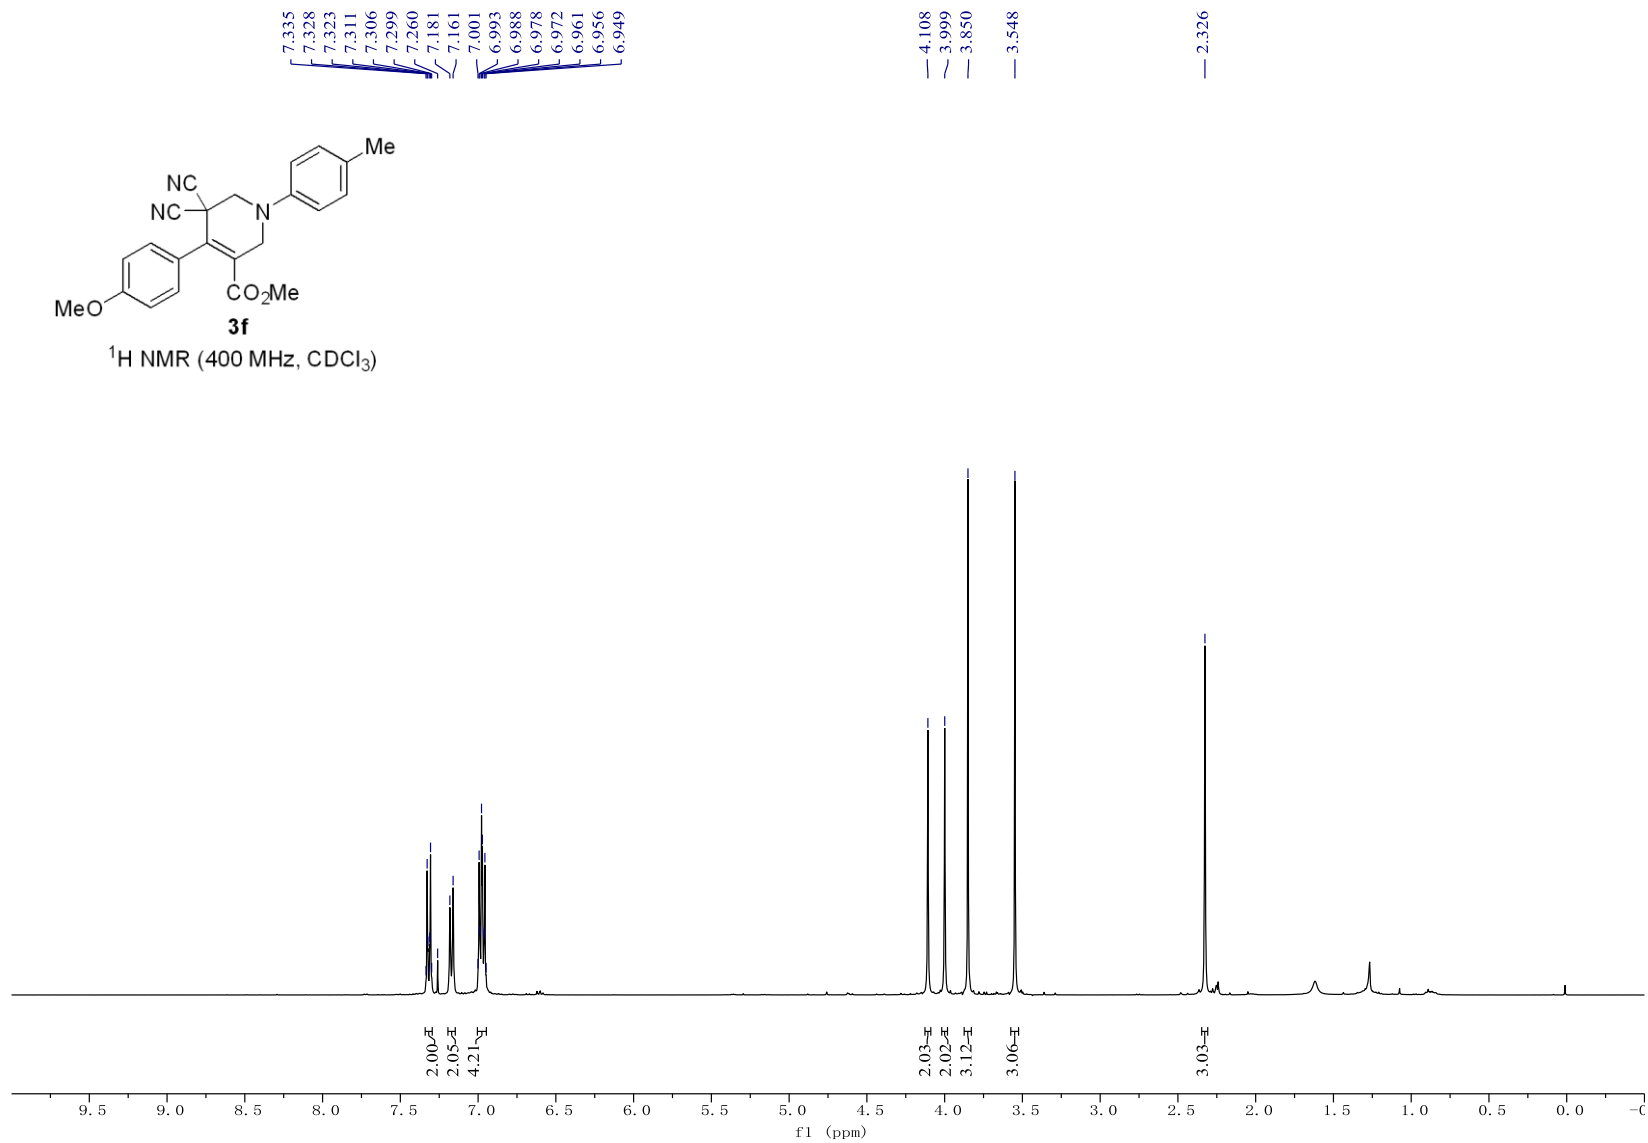

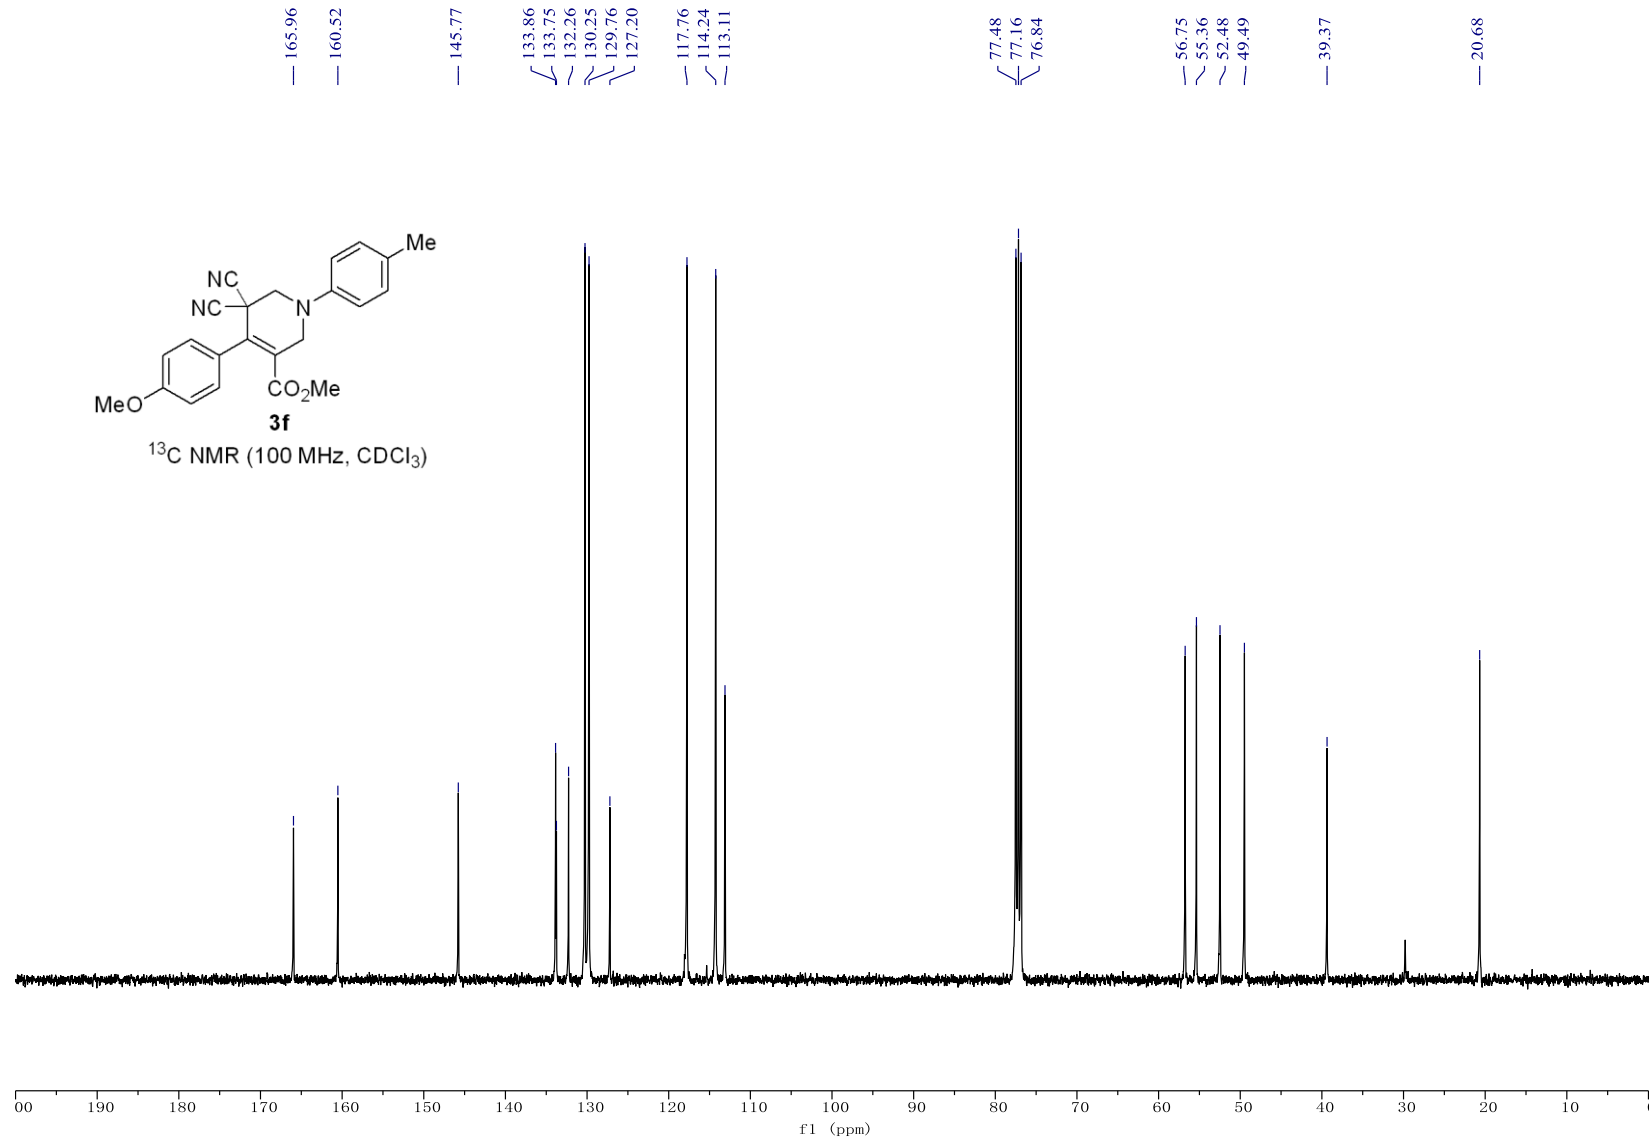

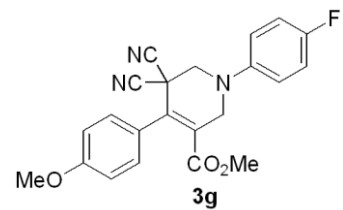

<sup>1</sup>H NMR (400 MHz, CDCl<sub>3</sub>)

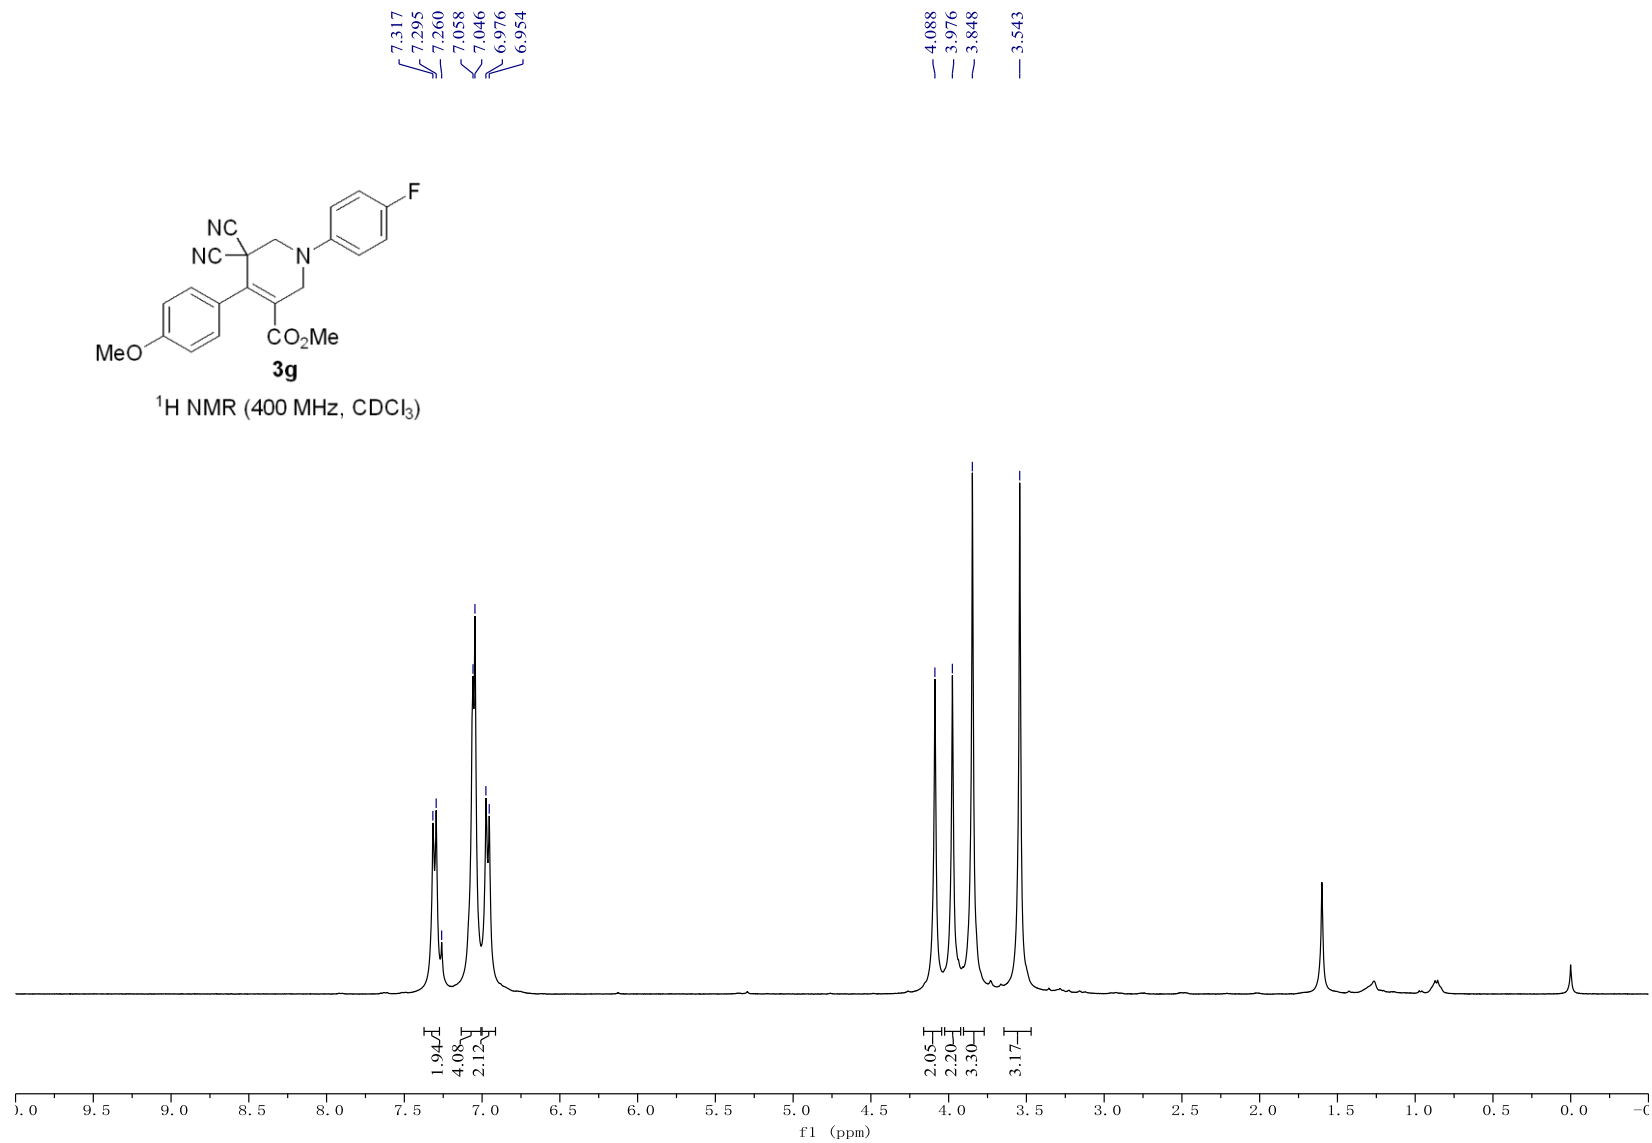



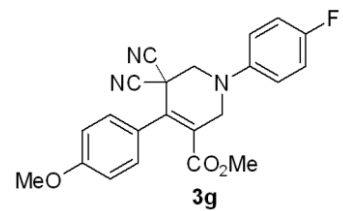

$^{13}\text{C}$  NMR (100 MHz,  $\text{CDCl}_3$ )

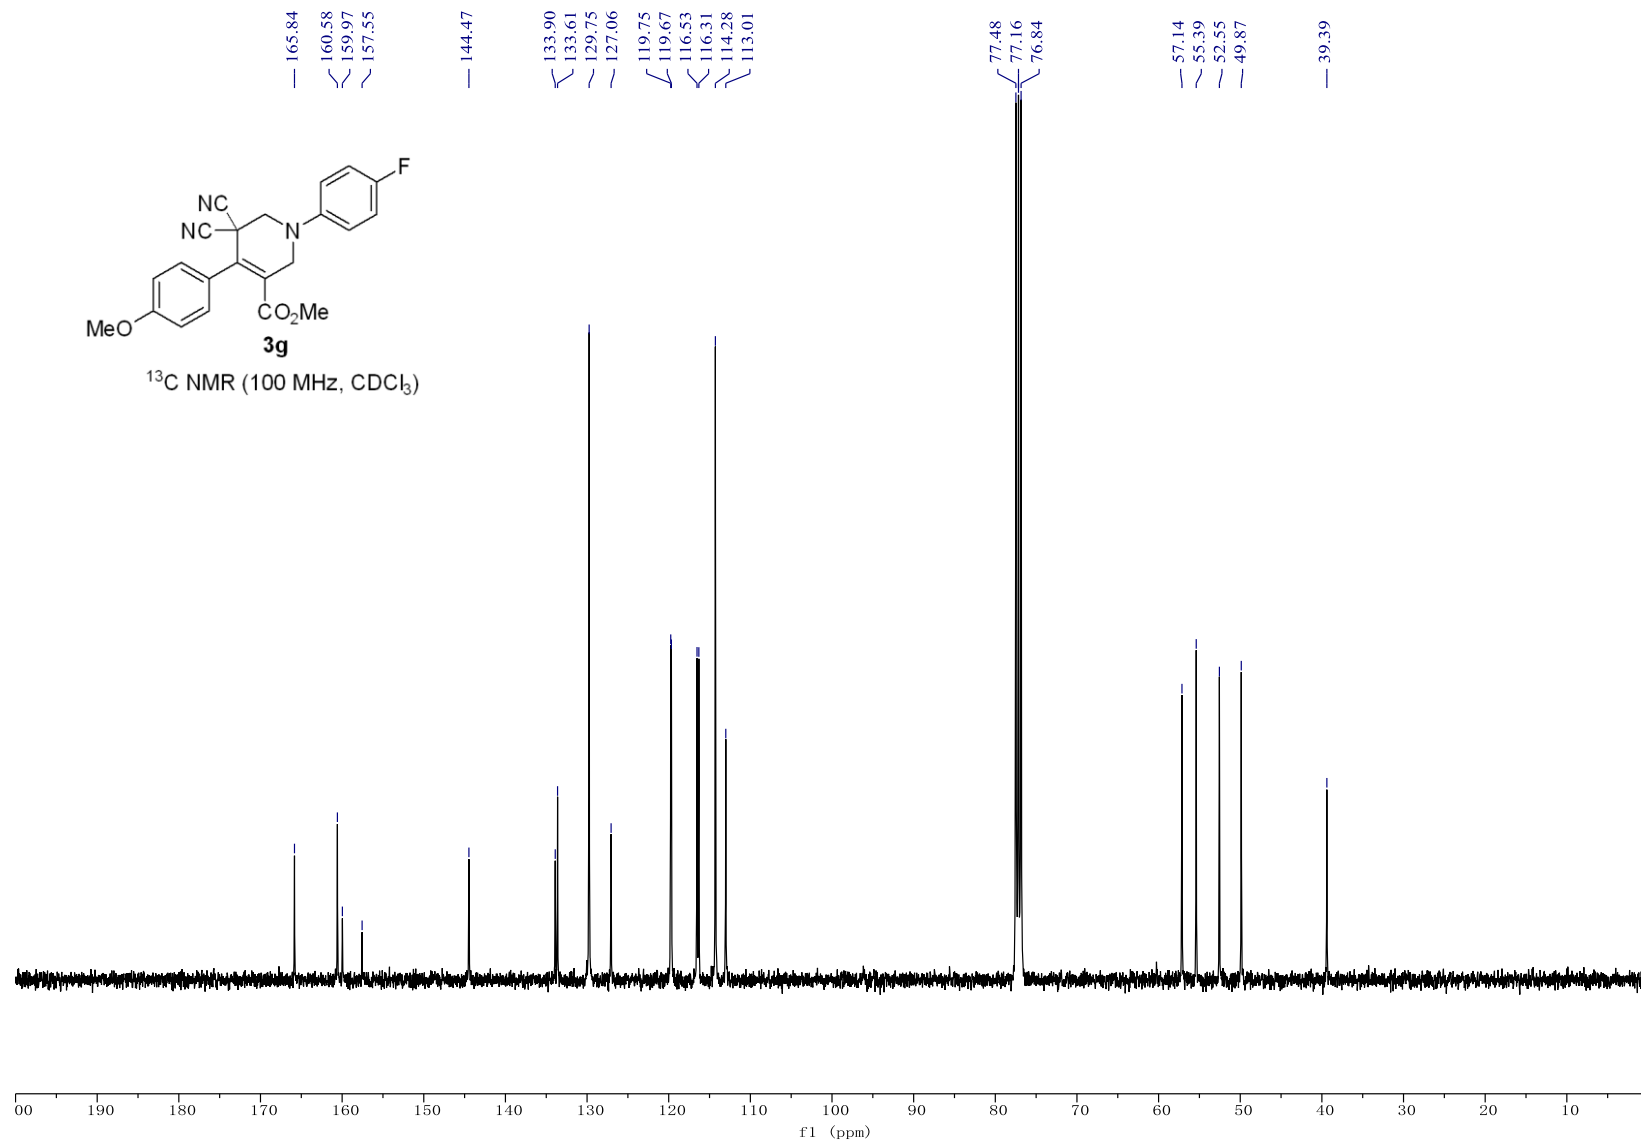

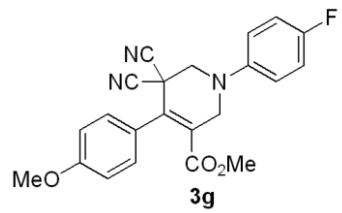

<sup>19</sup>F NMR (376 MHz, CDCl<sub>3</sub>)

-120.213  
-120.229  
-120.244  
-120.260

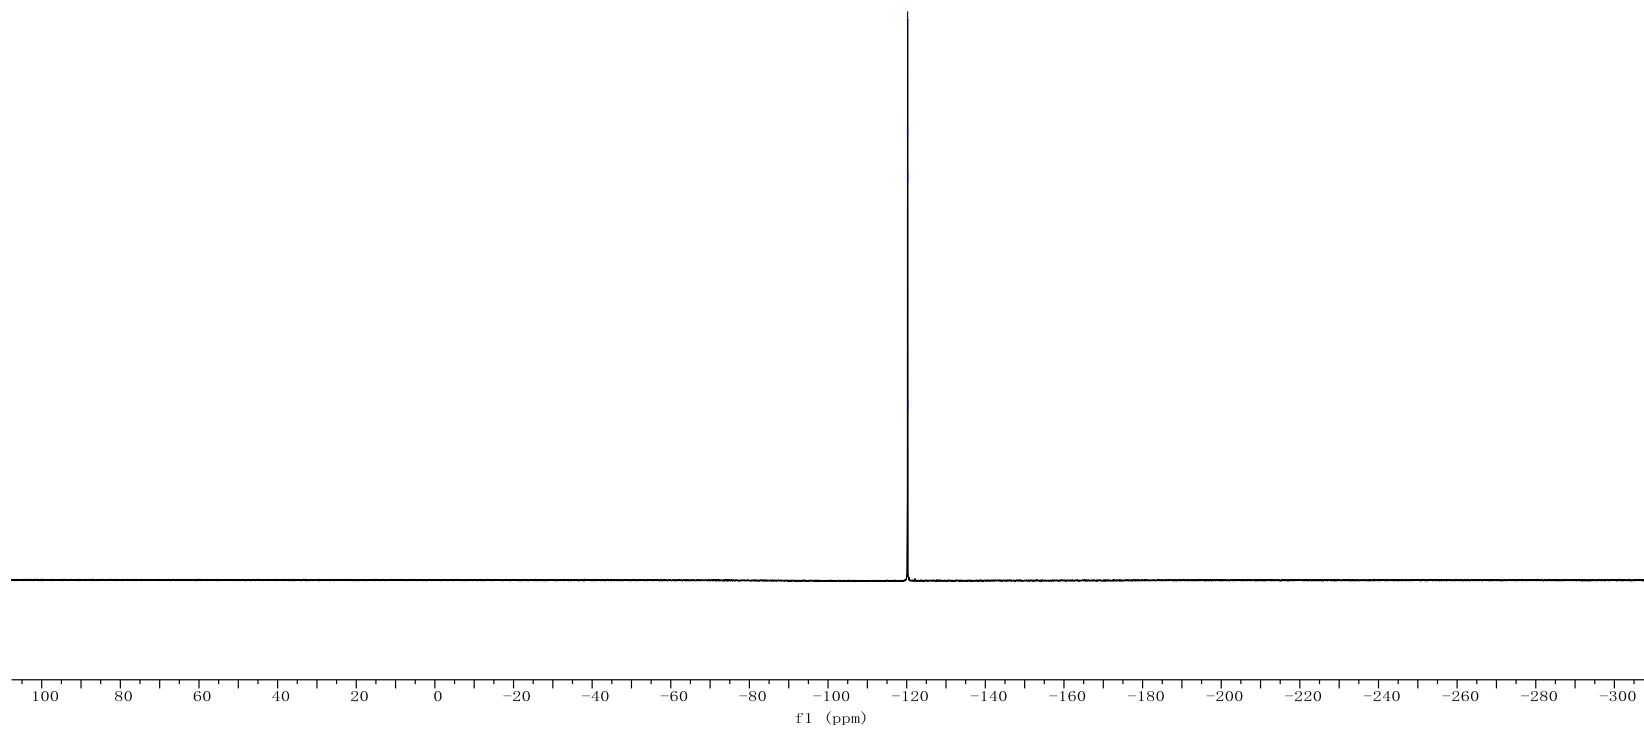

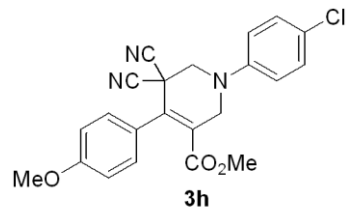

<sup>1</sup>H NMR (400 MHz, CDCl<sub>3</sub>)

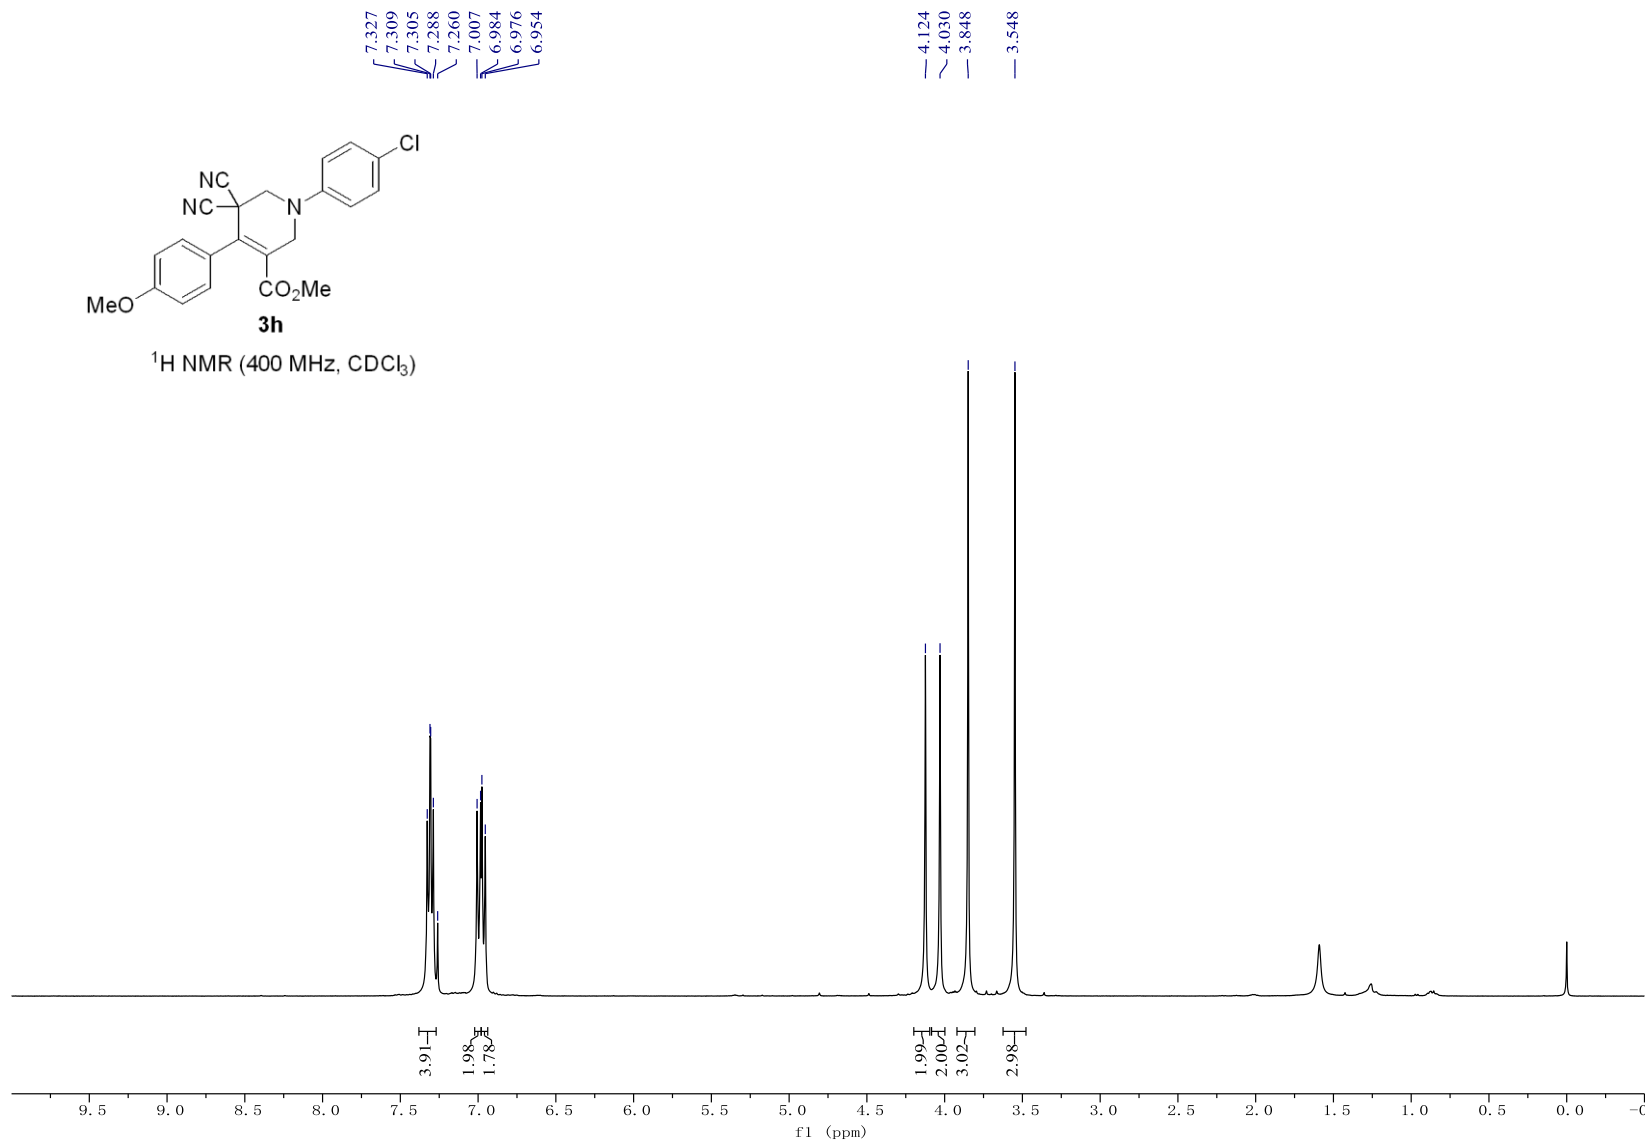

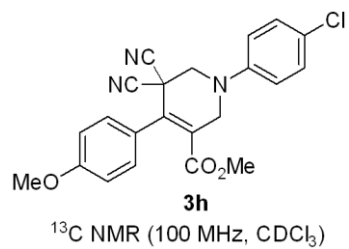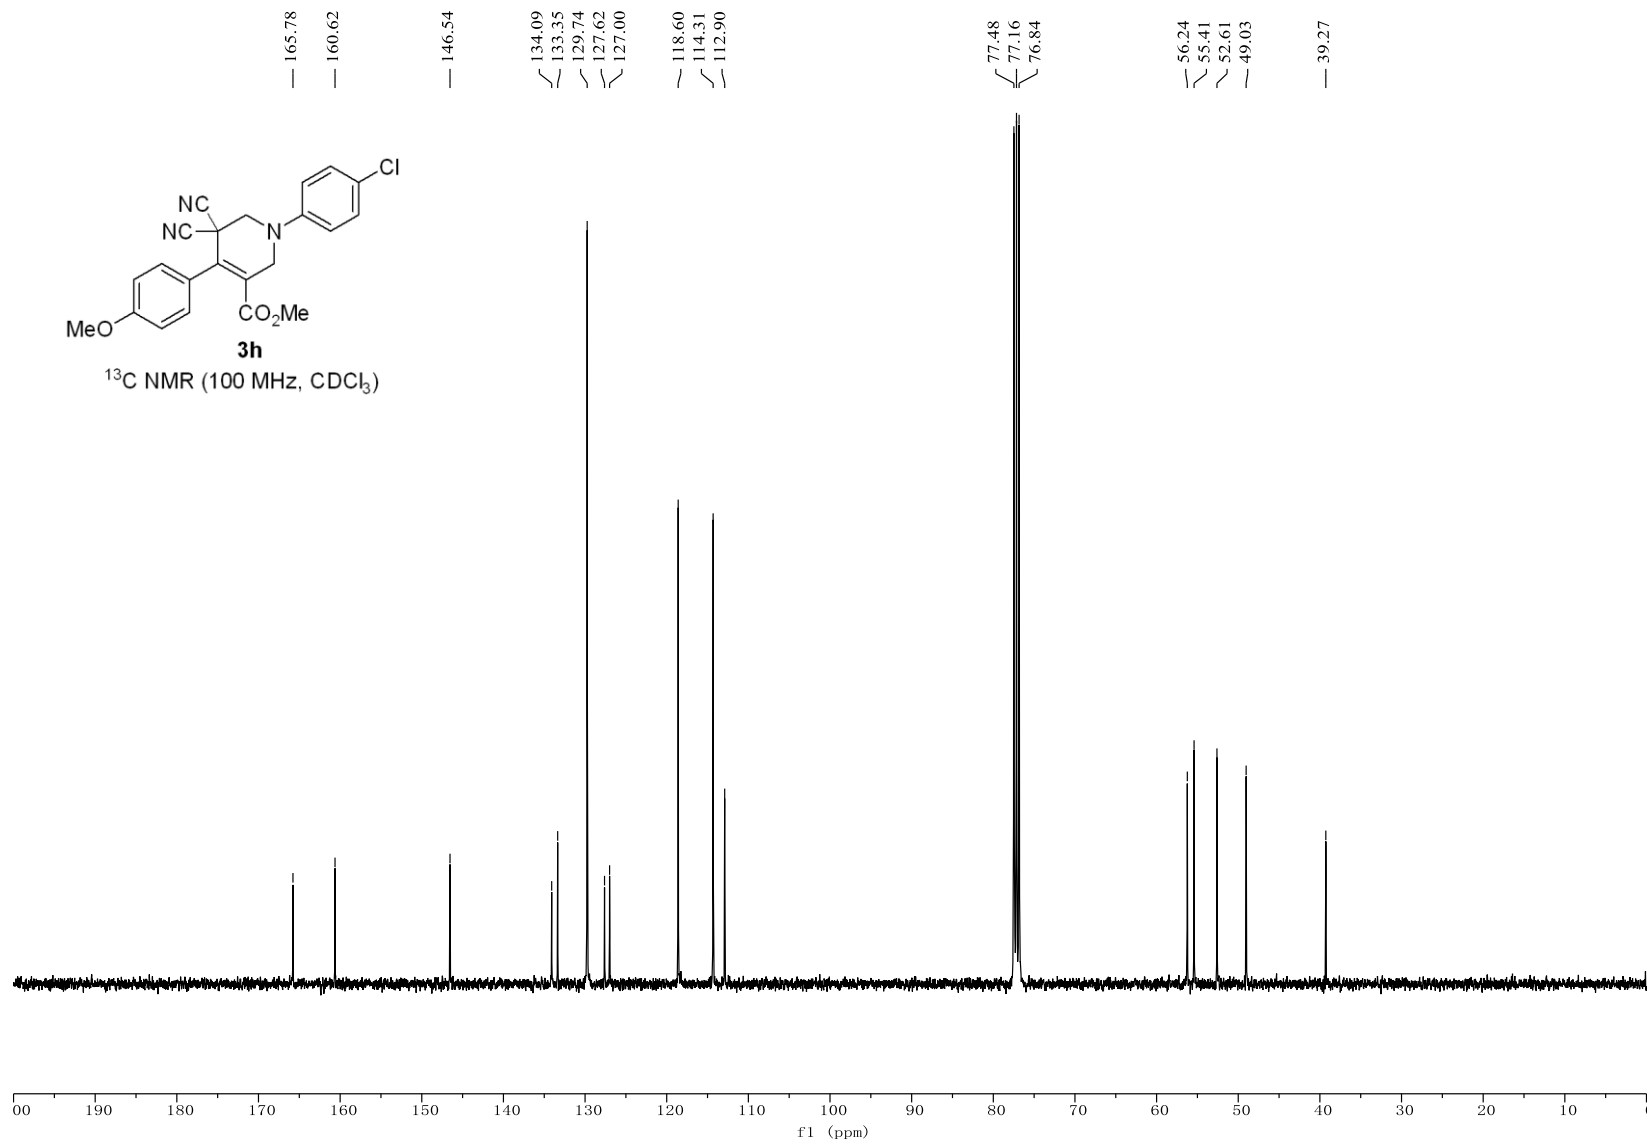

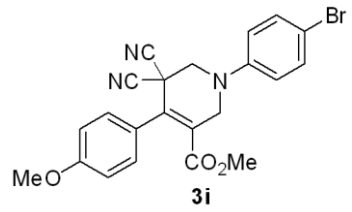

<sup>1</sup>H NMR (400 MHz, CDCl<sub>3</sub>)

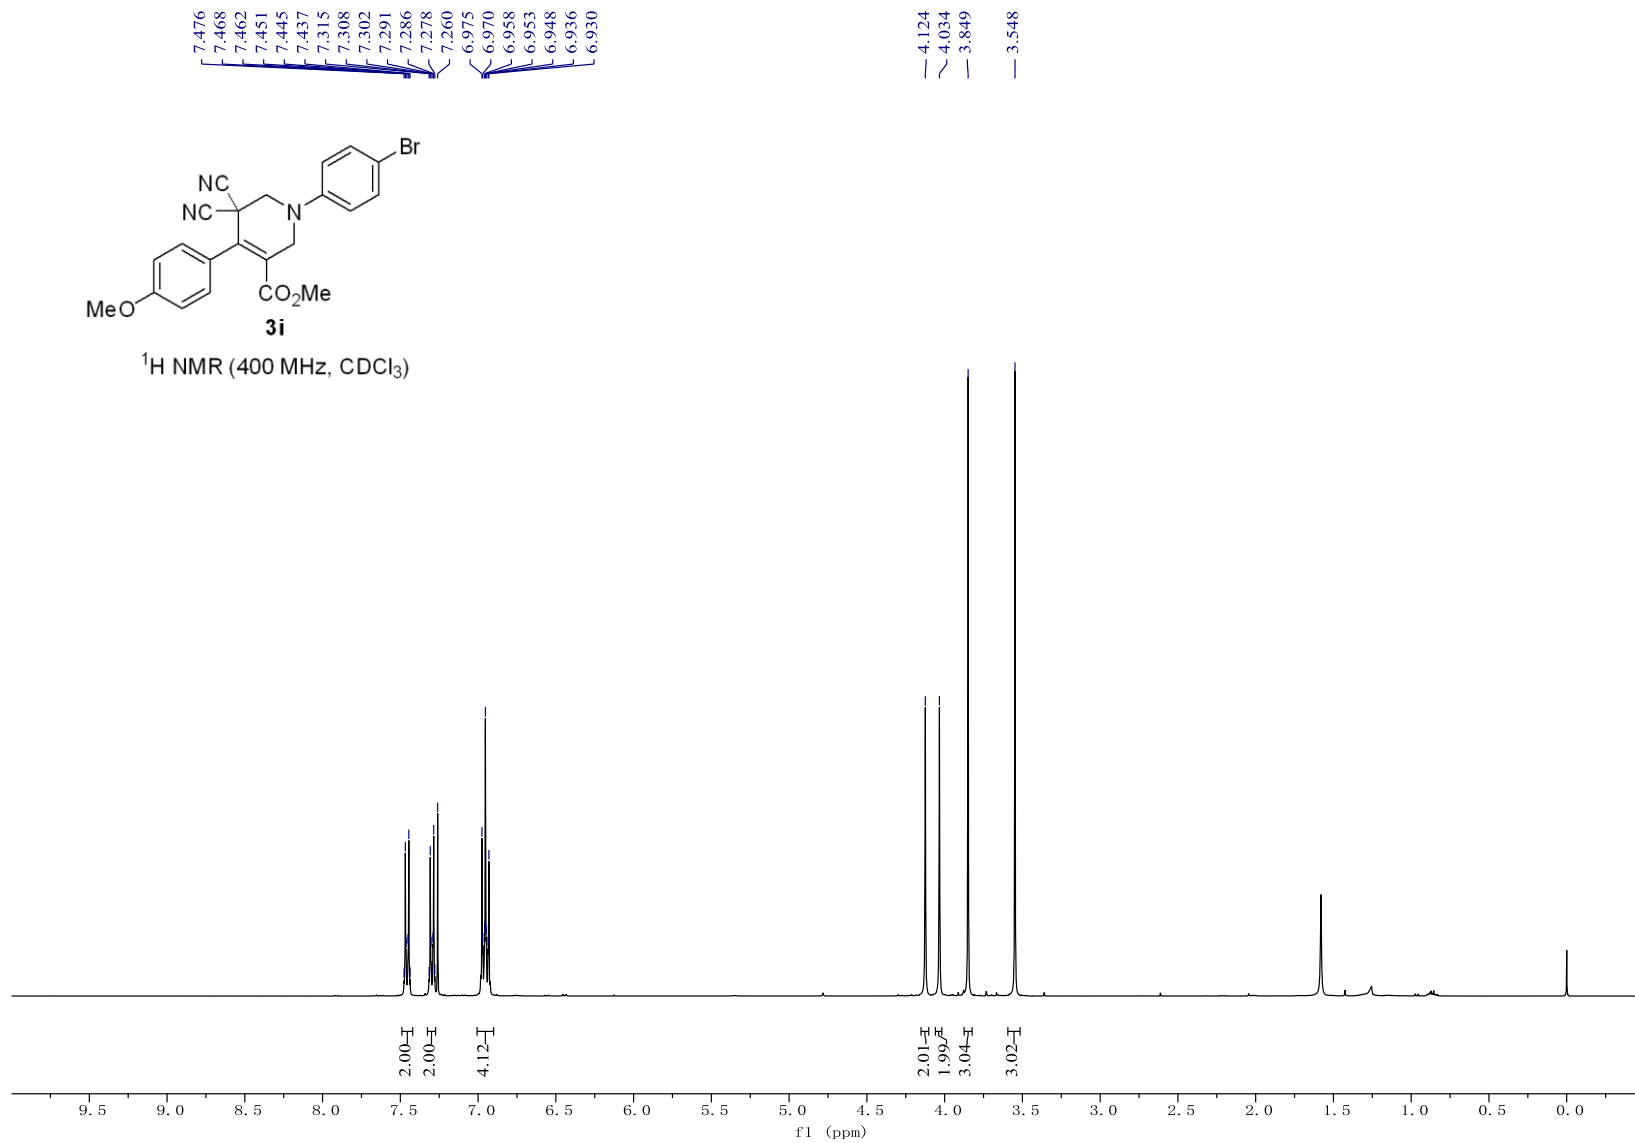

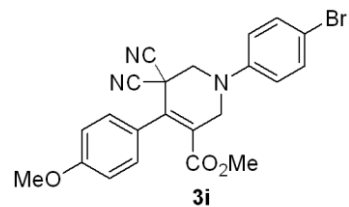

<sup>13</sup>C NMR (100 MHz, CDCl<sub>3</sub>)

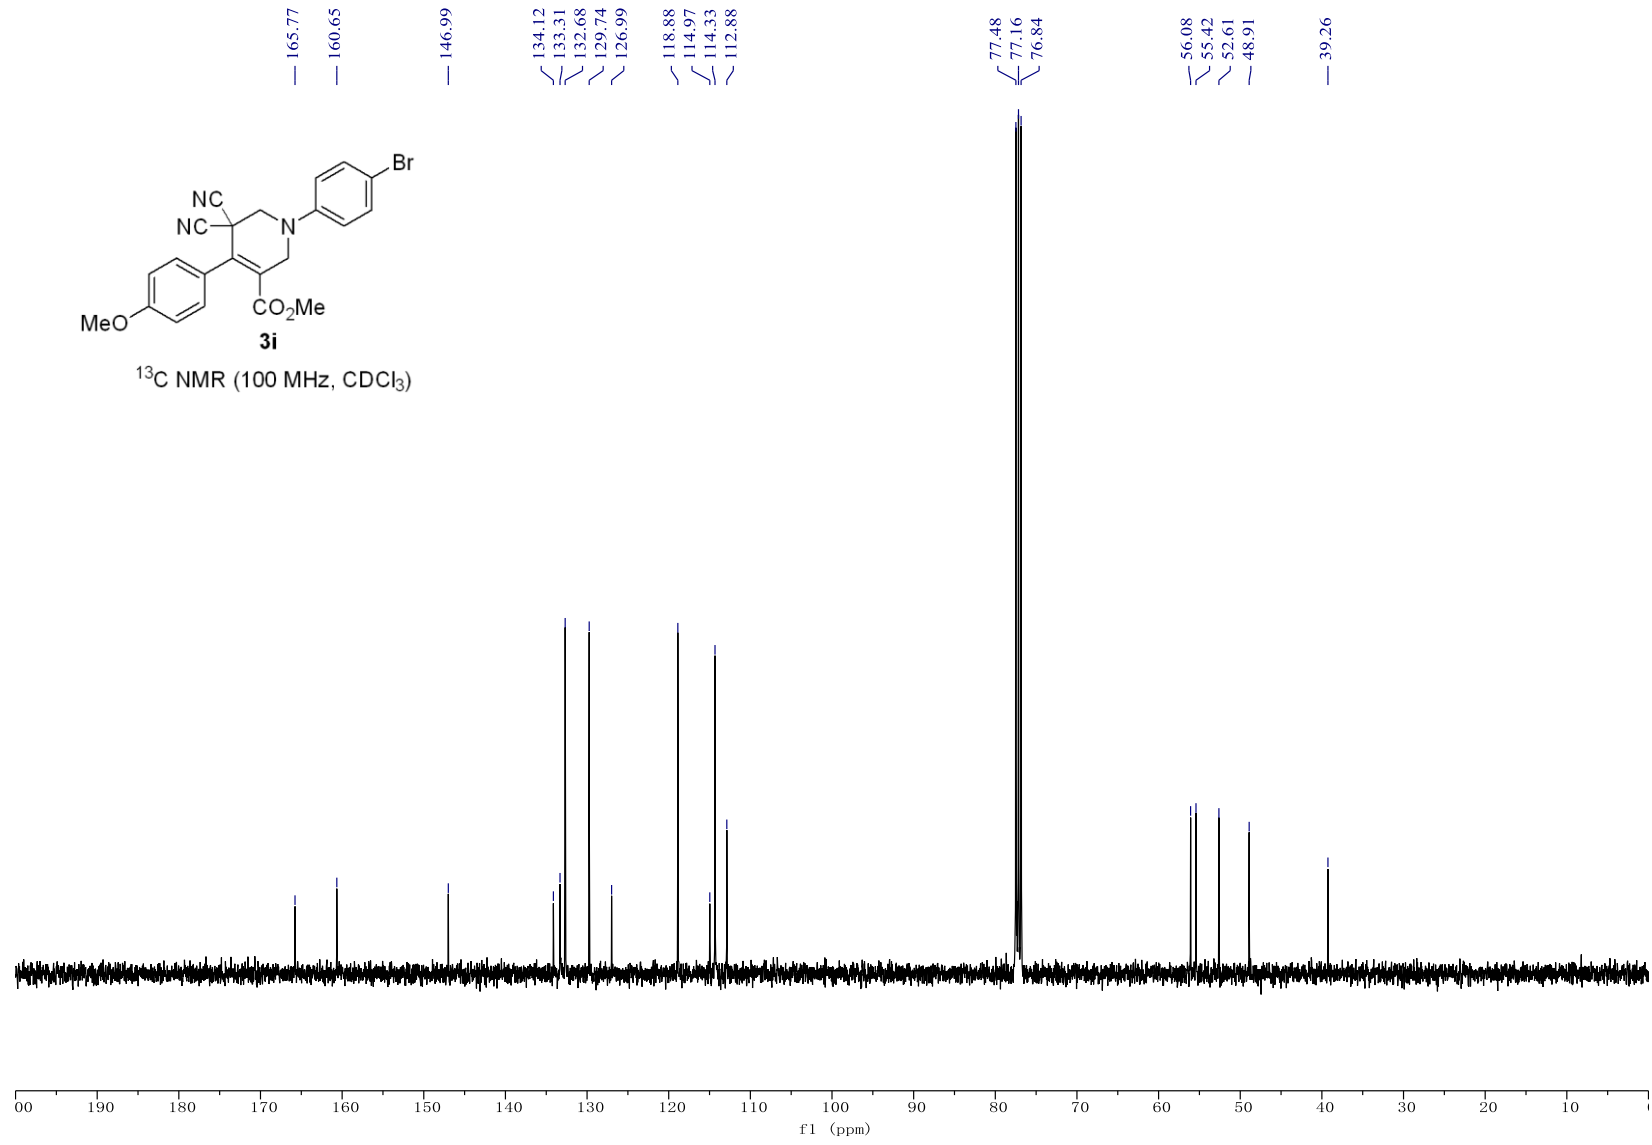

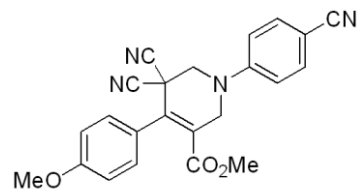

**3j**

<sup>1</sup>H NMR (400 MHz, CDCl<sub>3</sub>)

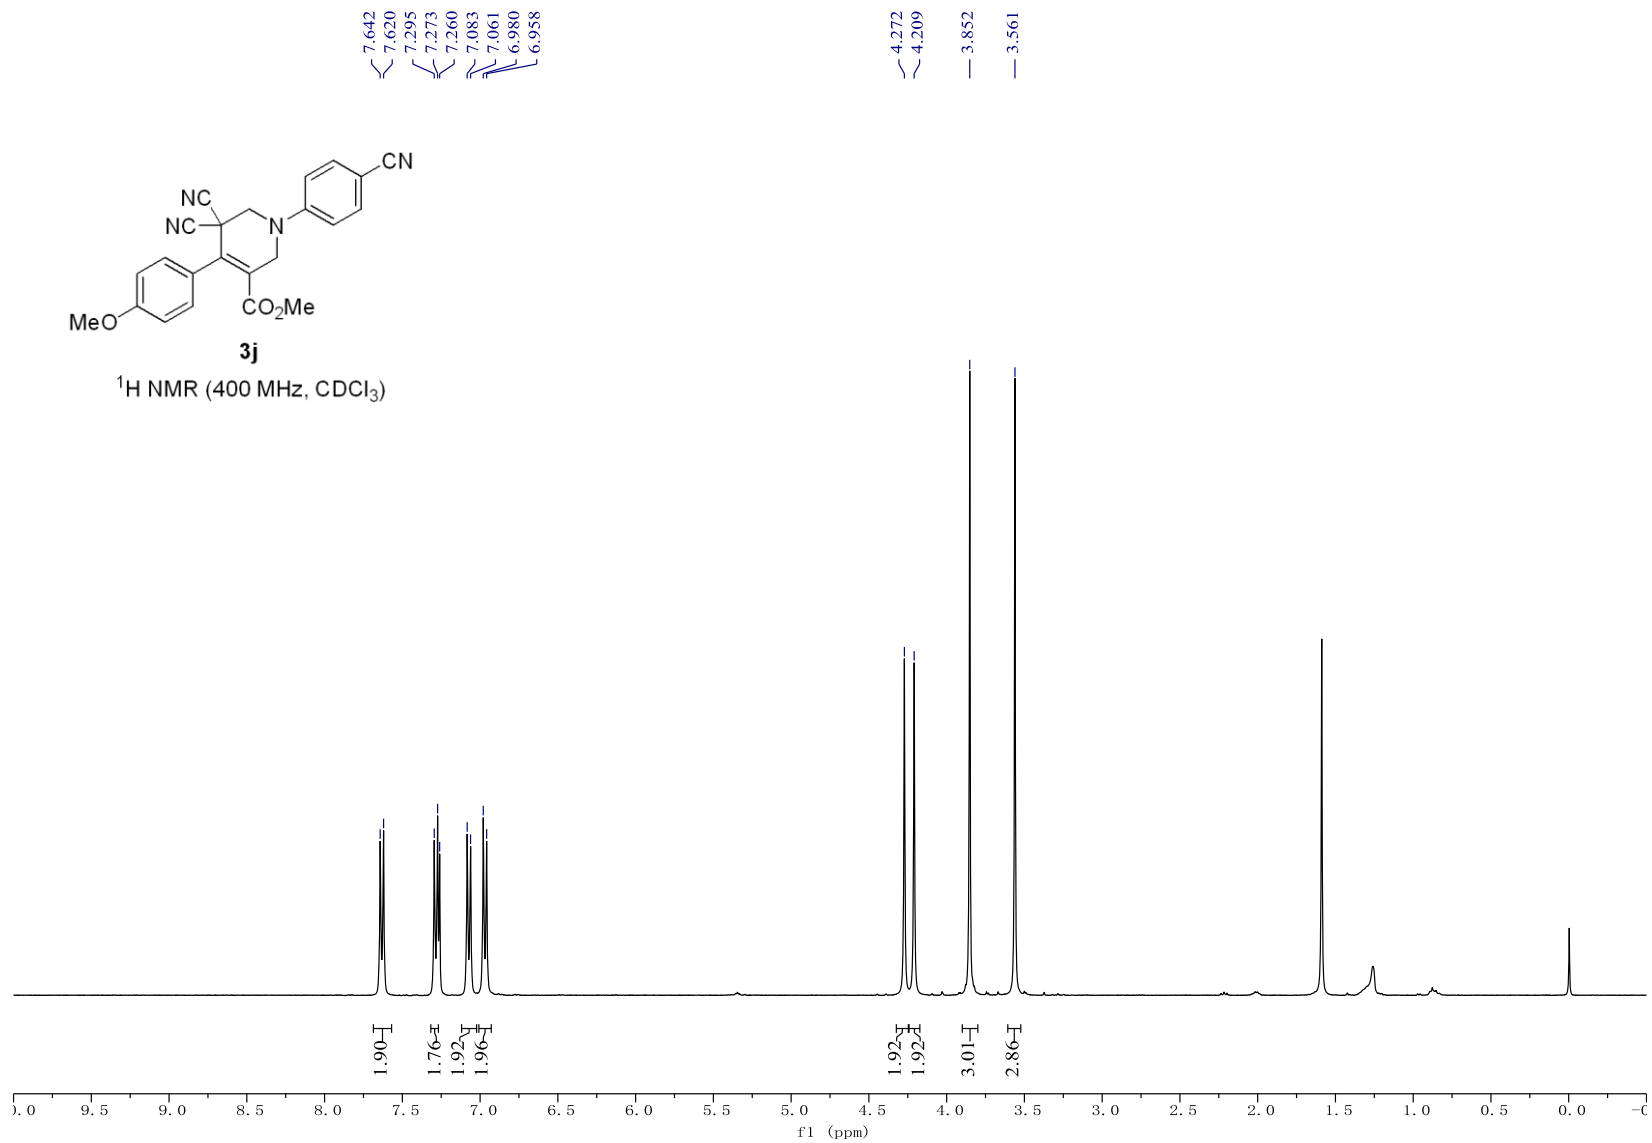

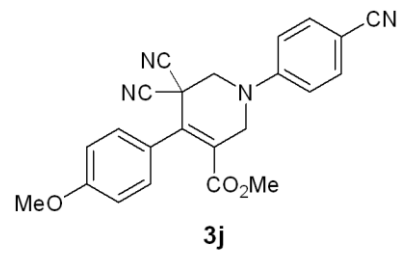

<sup>13</sup>C NMR (100 MHz, CDCl<sub>3</sub>)

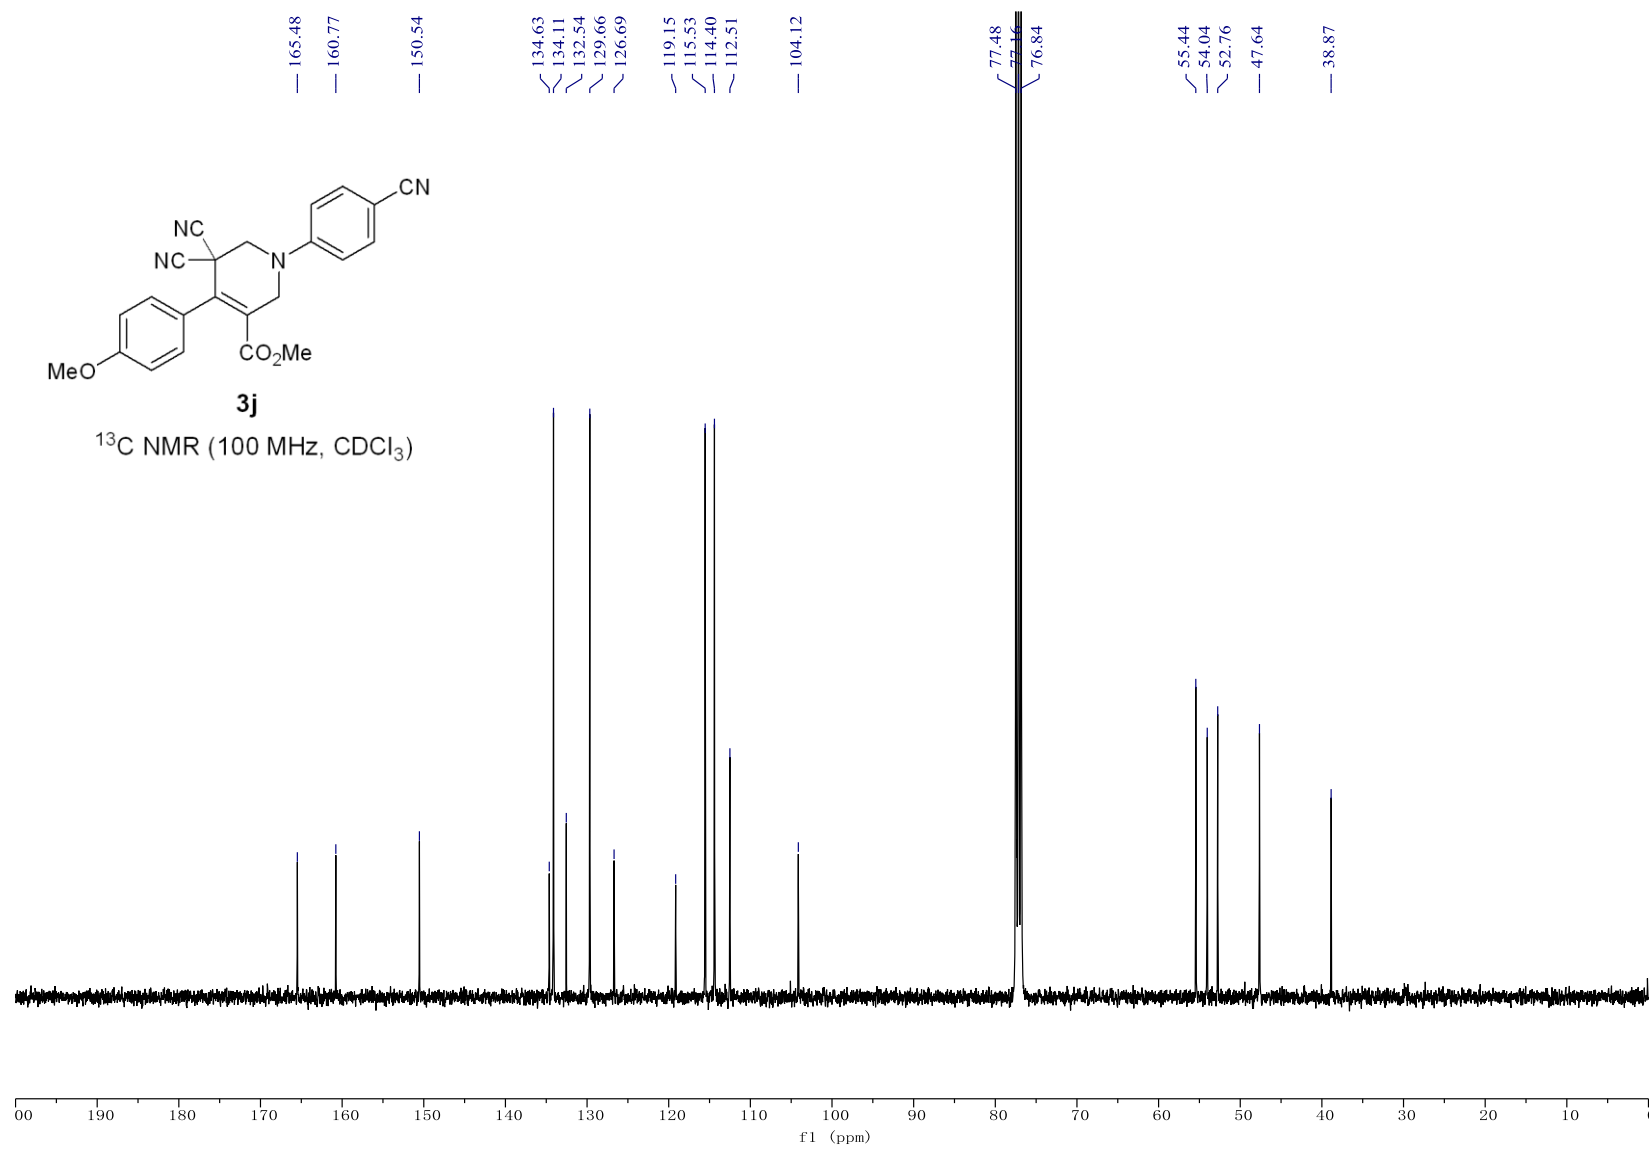



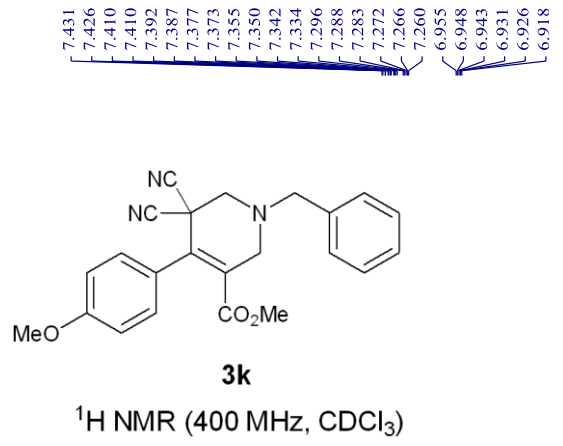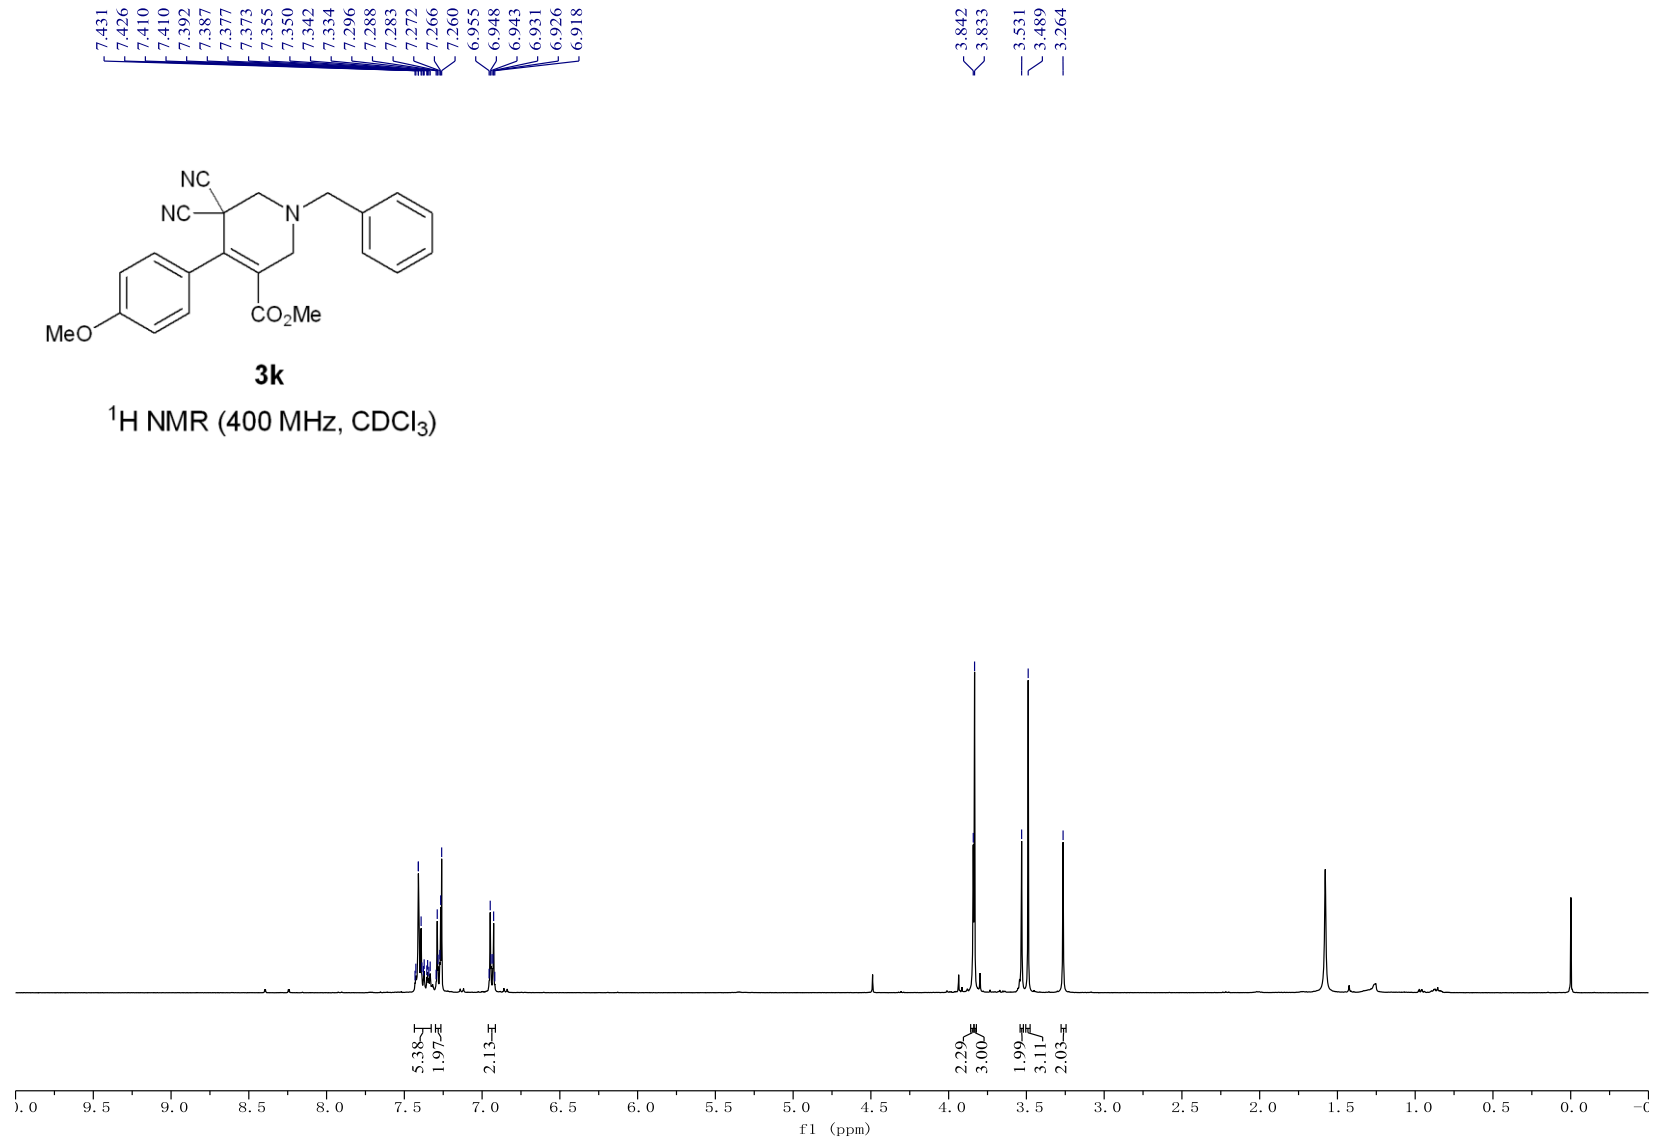

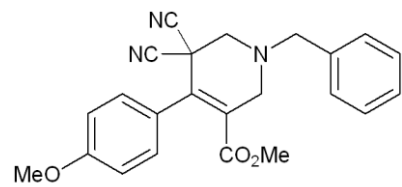

**3k**

$^{13}\text{C}$  NMR (100 MHz,  $\text{CDCl}_3$ )

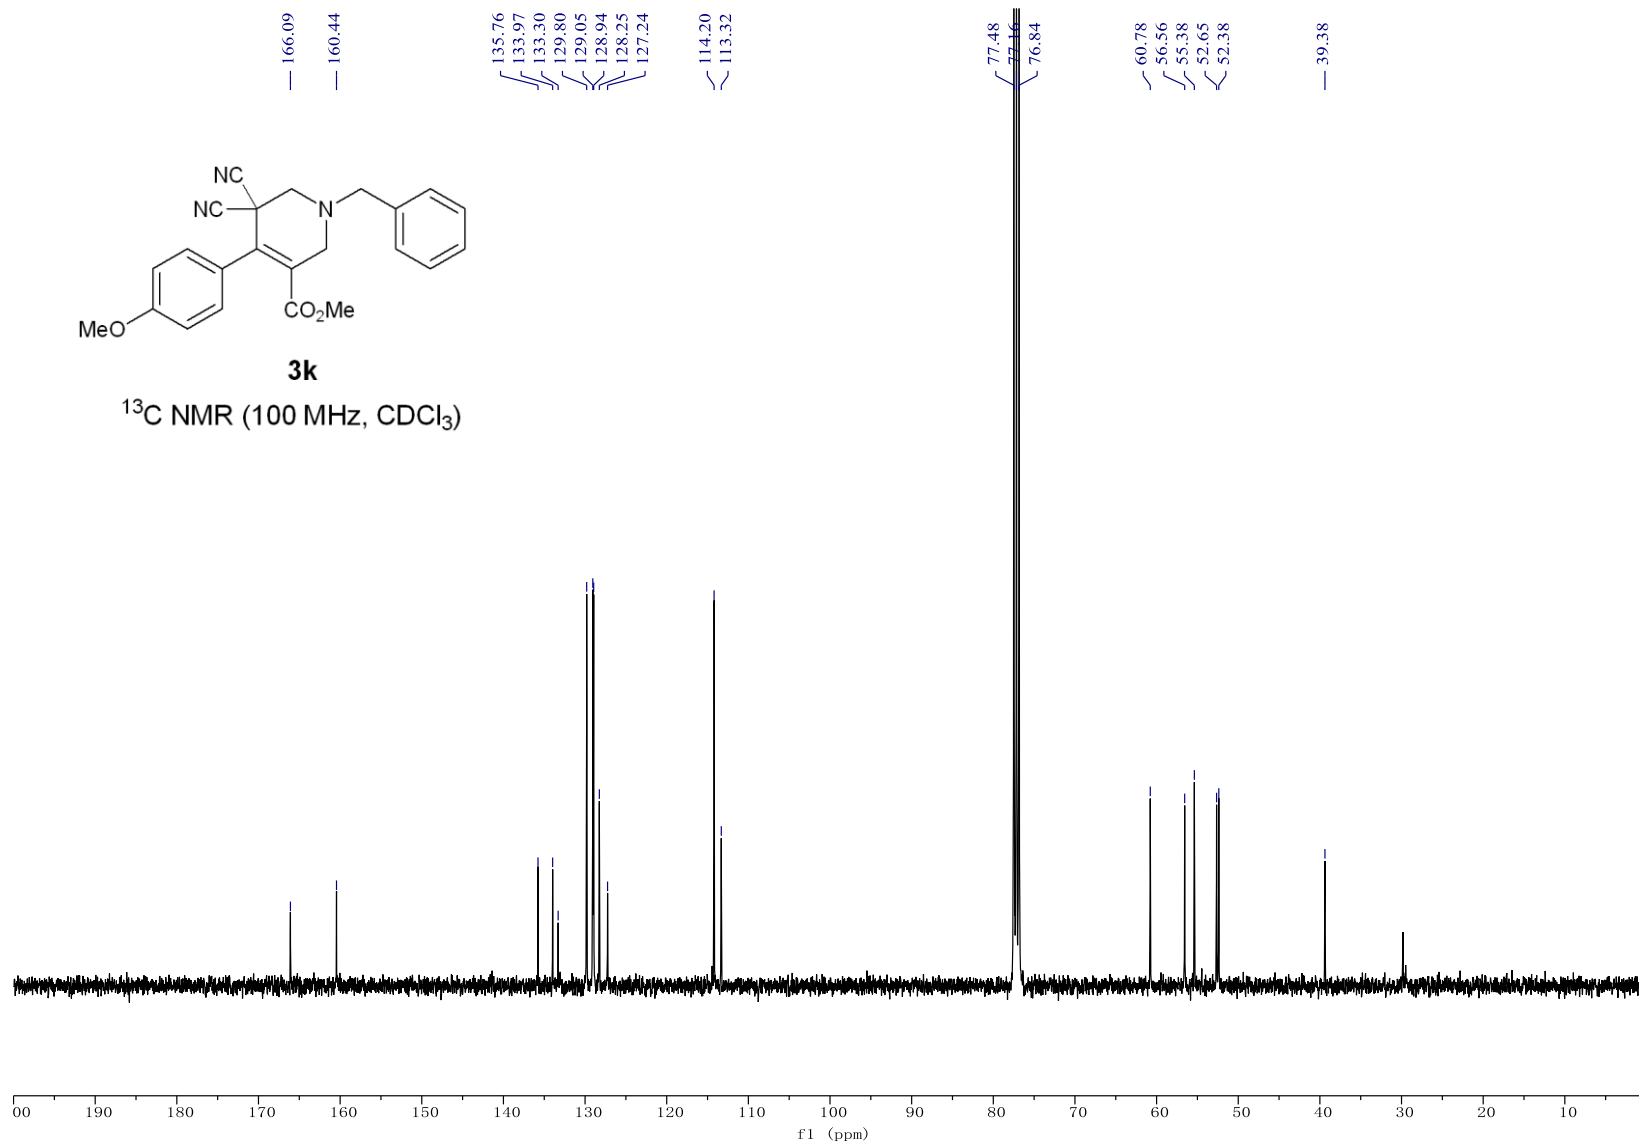

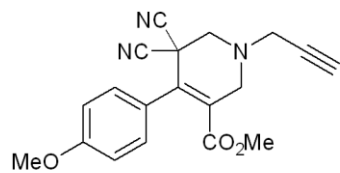

**31**

$^1\text{H NMR}$  (400 MHz,  $\text{CDCl}_3$ )

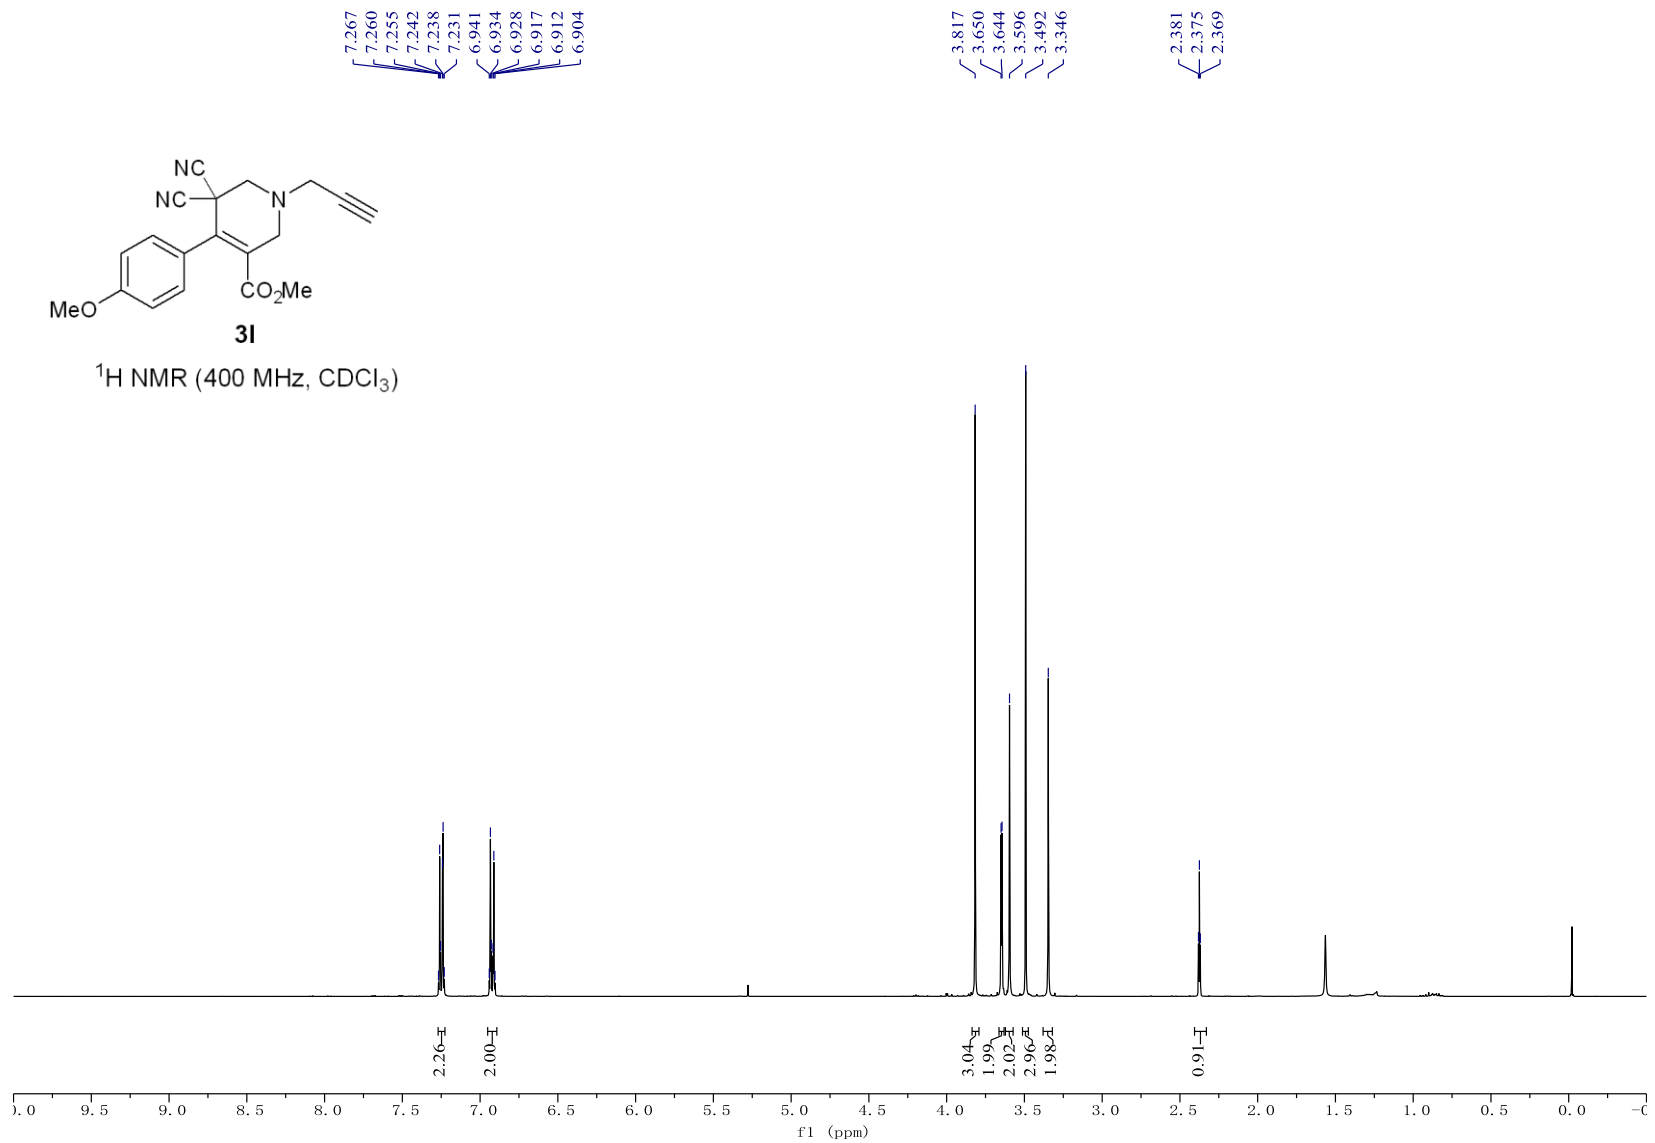

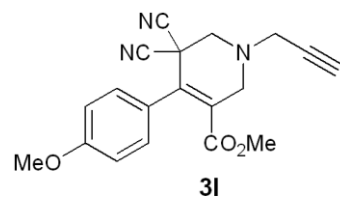

<sup>13</sup>C NMR (100 MHz, CDCl<sub>3</sub>)

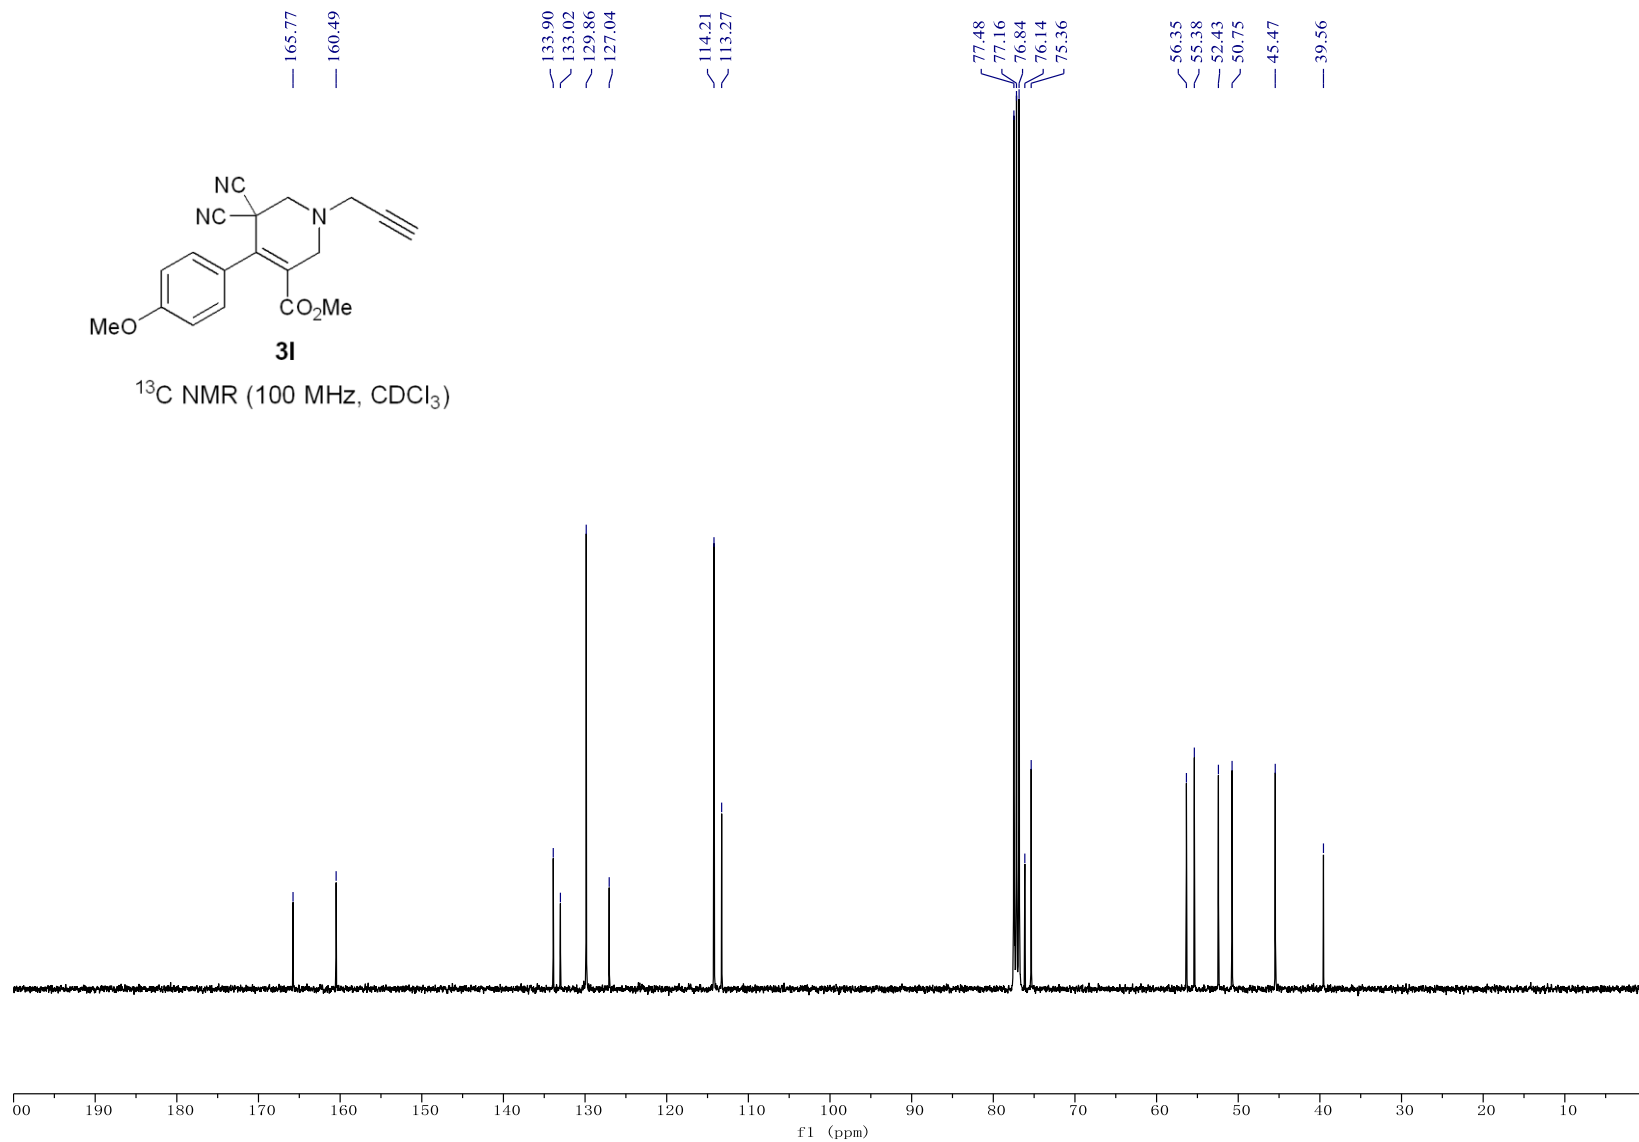

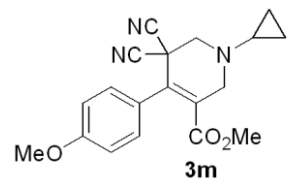

<sup>1</sup>H NMR (400 MHz, CDCl<sub>3</sub>)

7.2647  
7.2440  
6.9404  
6.9188

3.8313  
3.6301  
3.5084  
3.4703

2.0624  
2.0465  
2.0380  
2.0282  
2.0137

0.6345  
0.6183

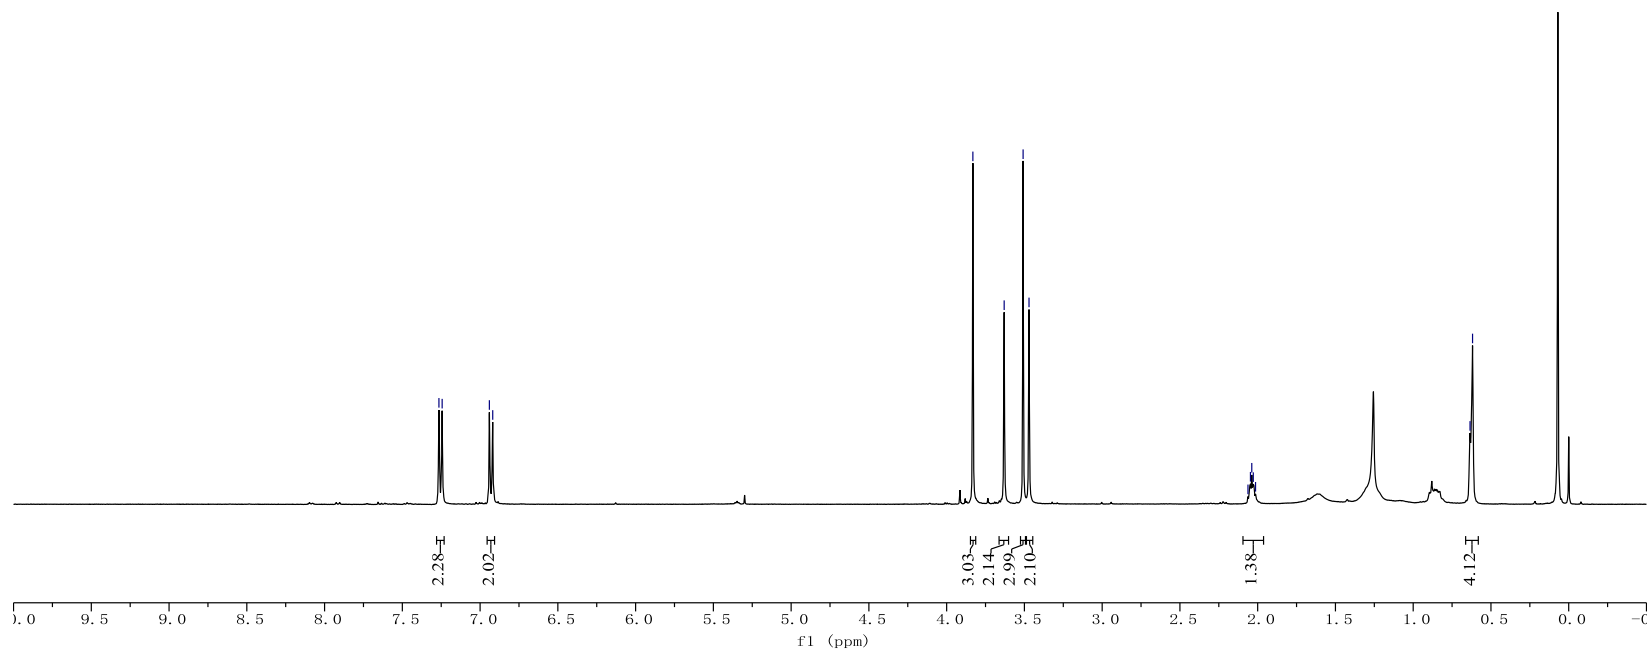

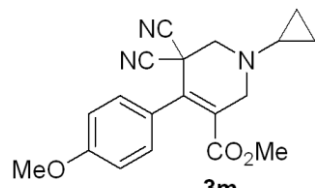

<sup>13</sup>C NMR (100 MHz, CDCl<sub>3</sub>)

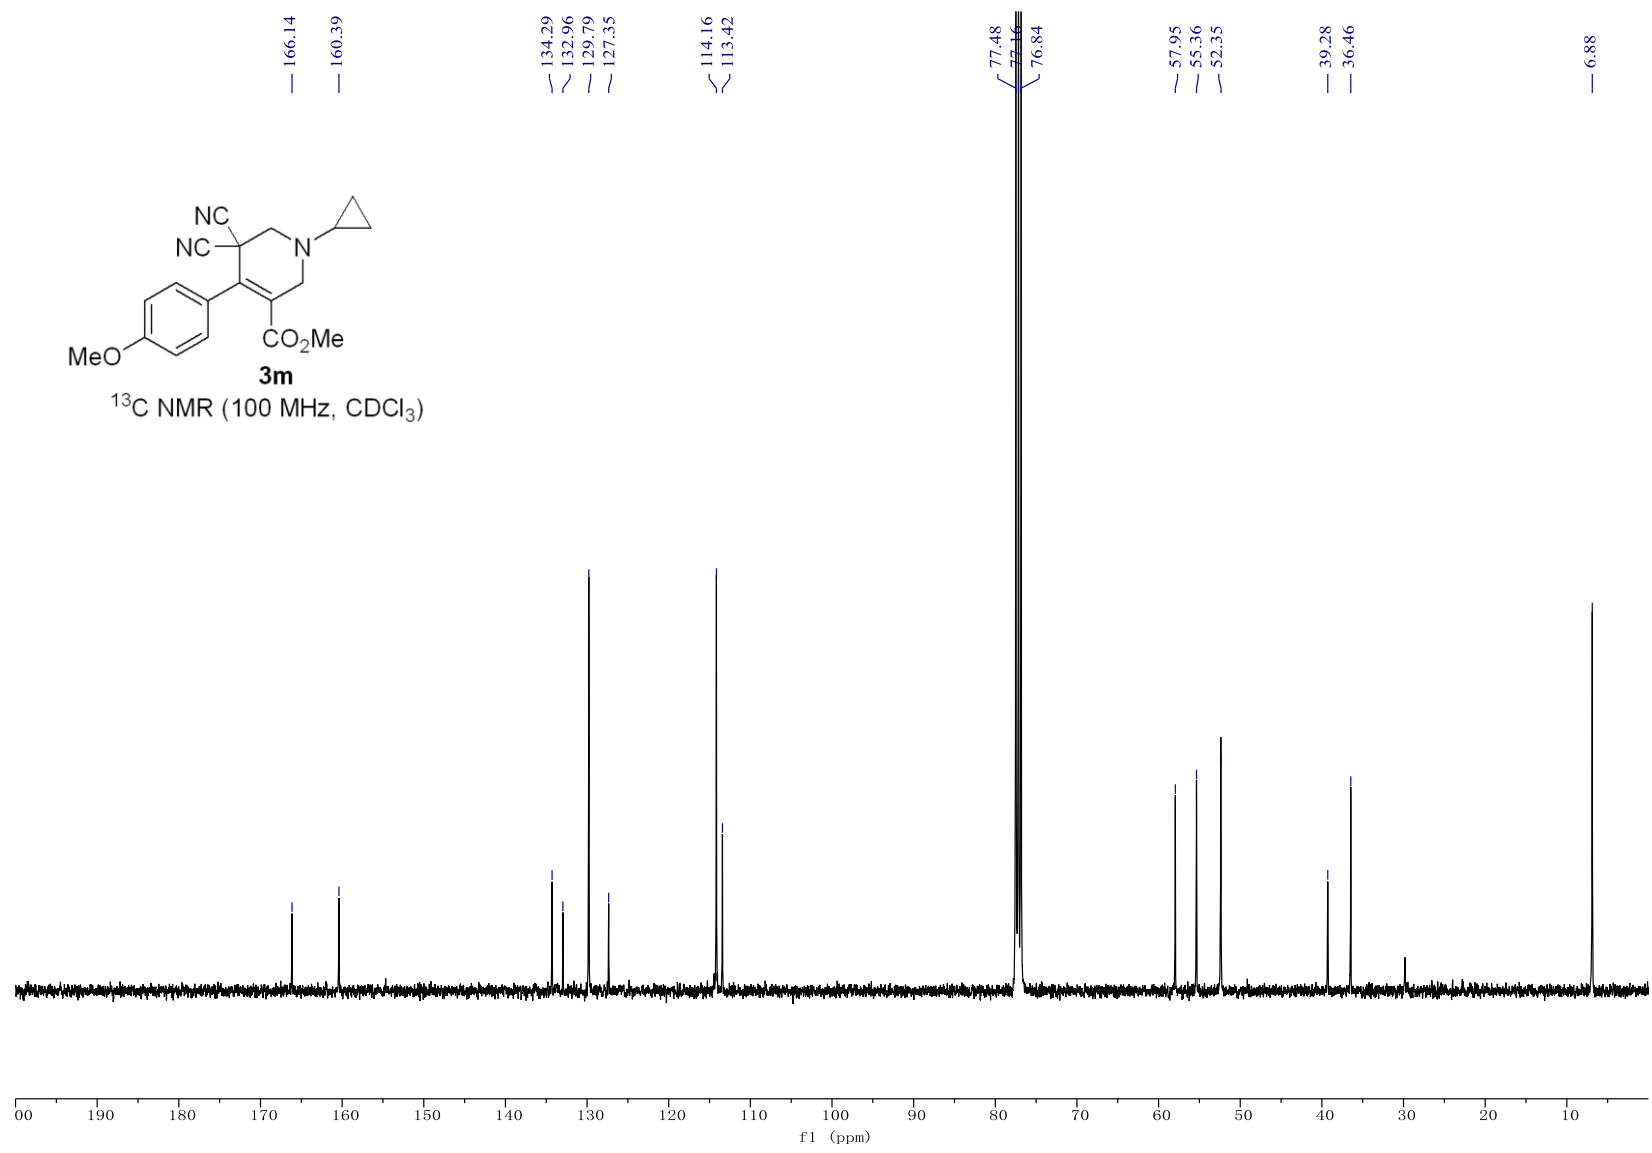

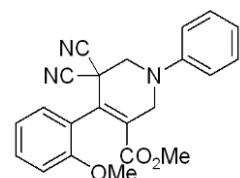

**3n**

$^1\text{H}$  NMR (400 MHz,  $\text{CDCl}_3$ )

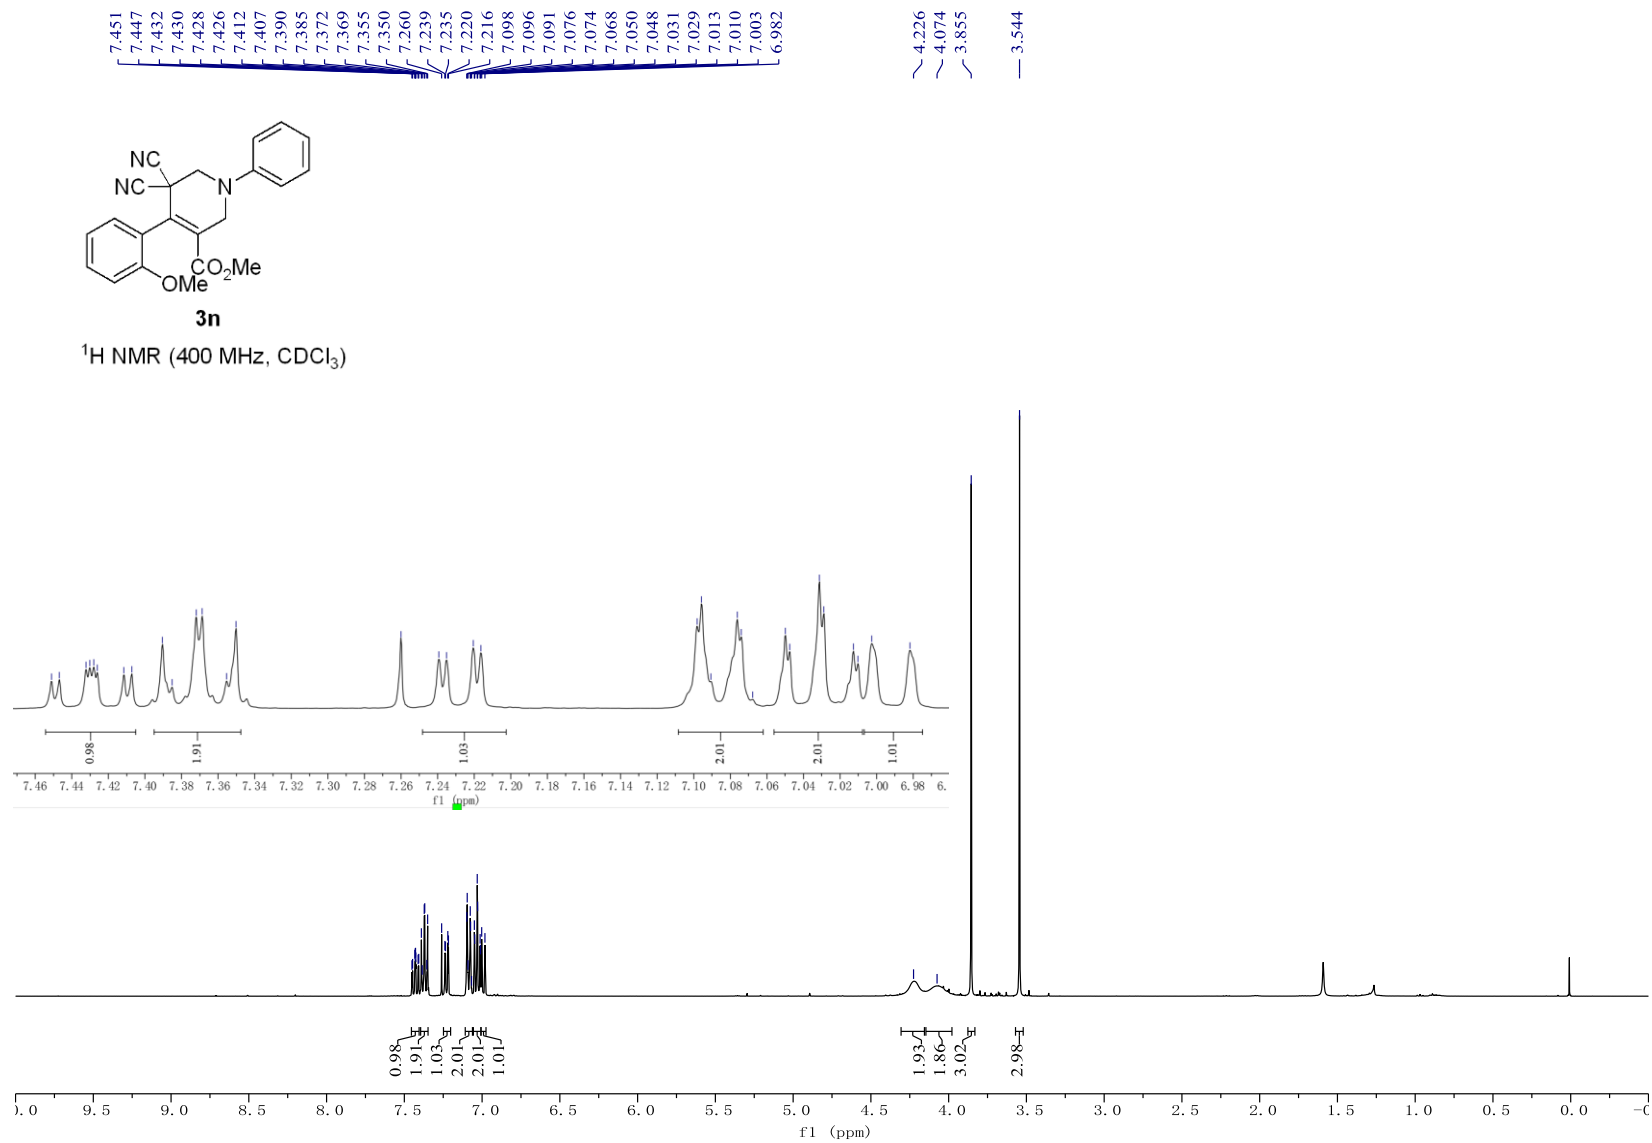

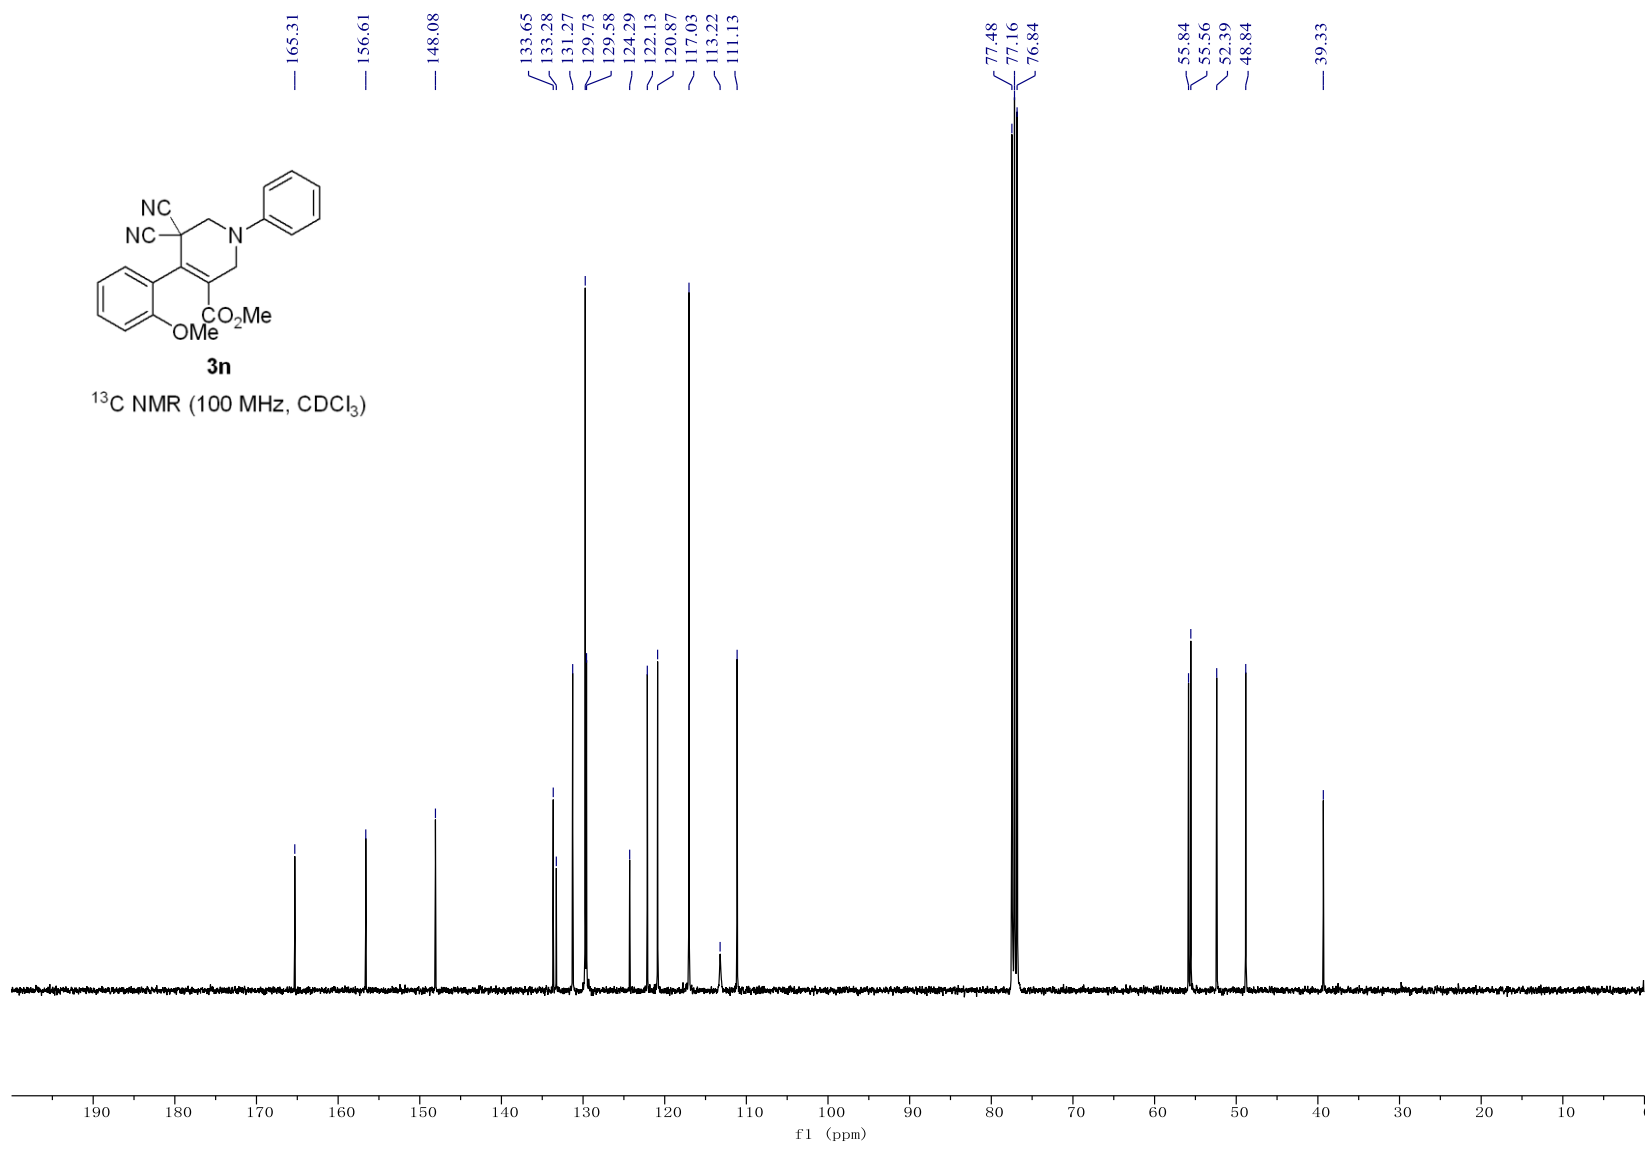



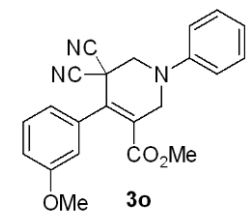

<sup>1</sup>H NMR (400 MHz, CDCl<sub>3</sub>)

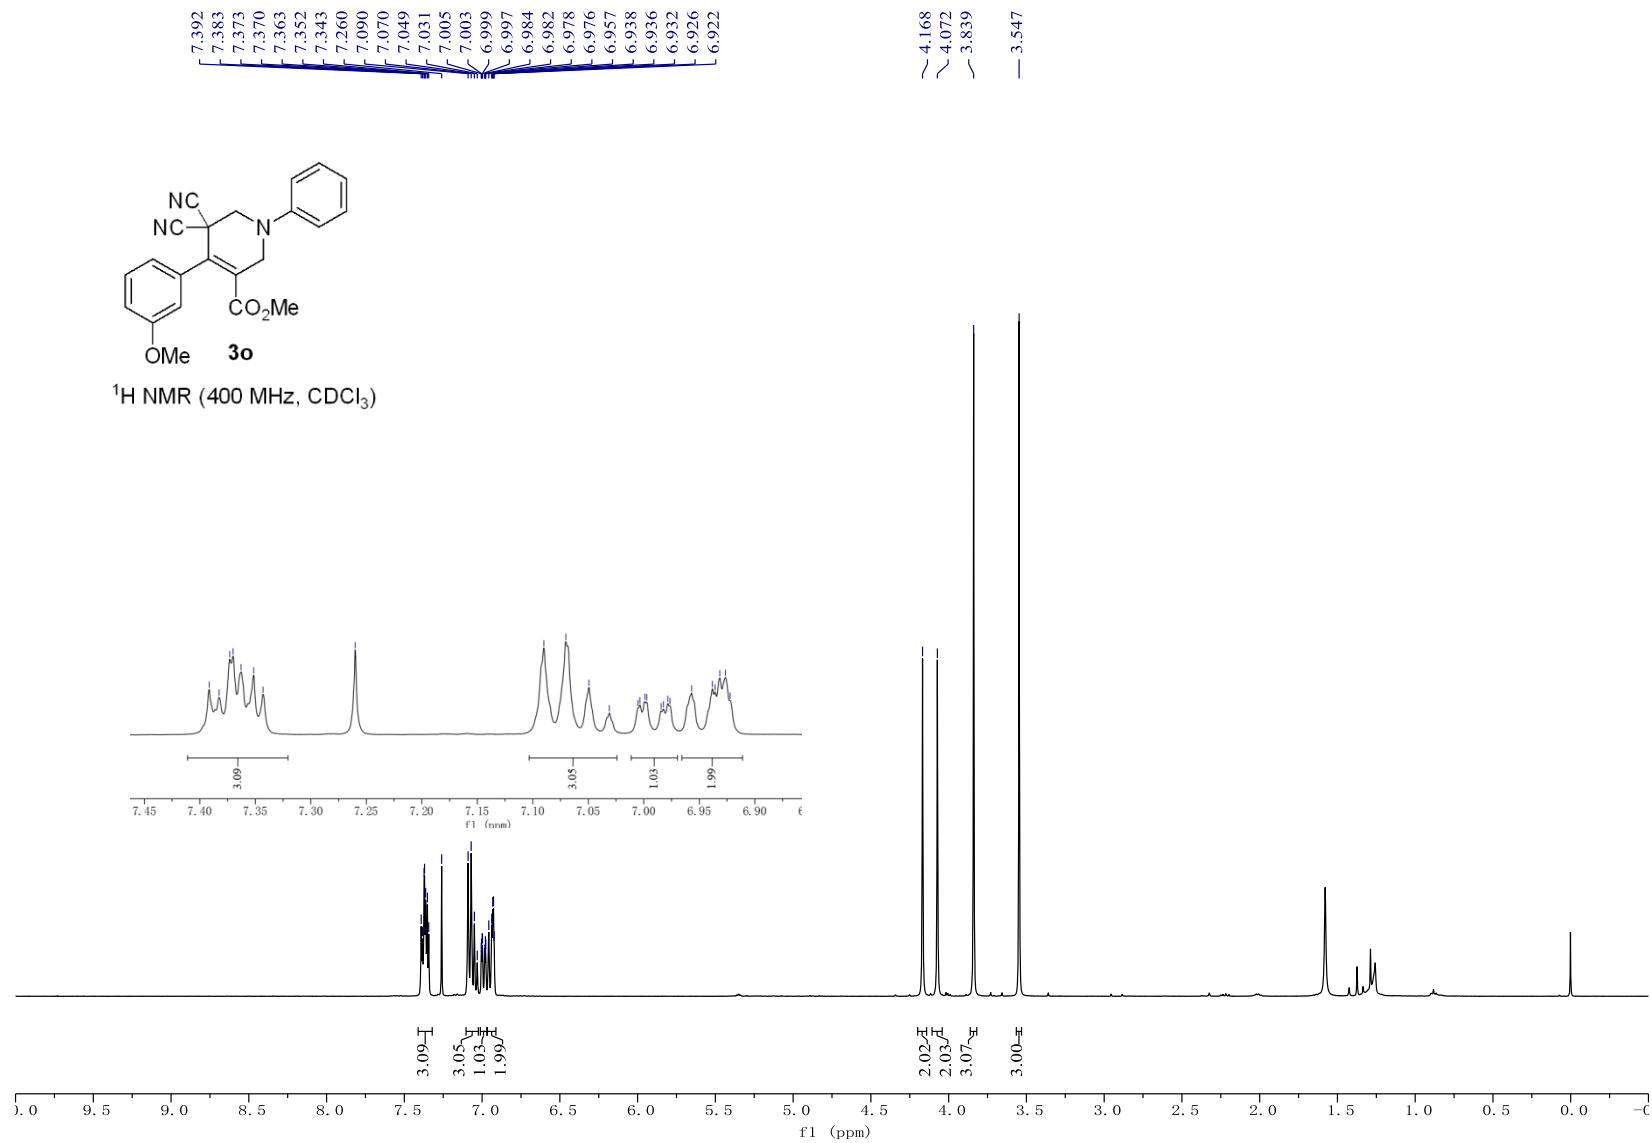

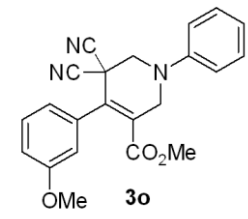

<sup>13</sup>C NMR (100 MHz, CDCl<sub>3</sub>)

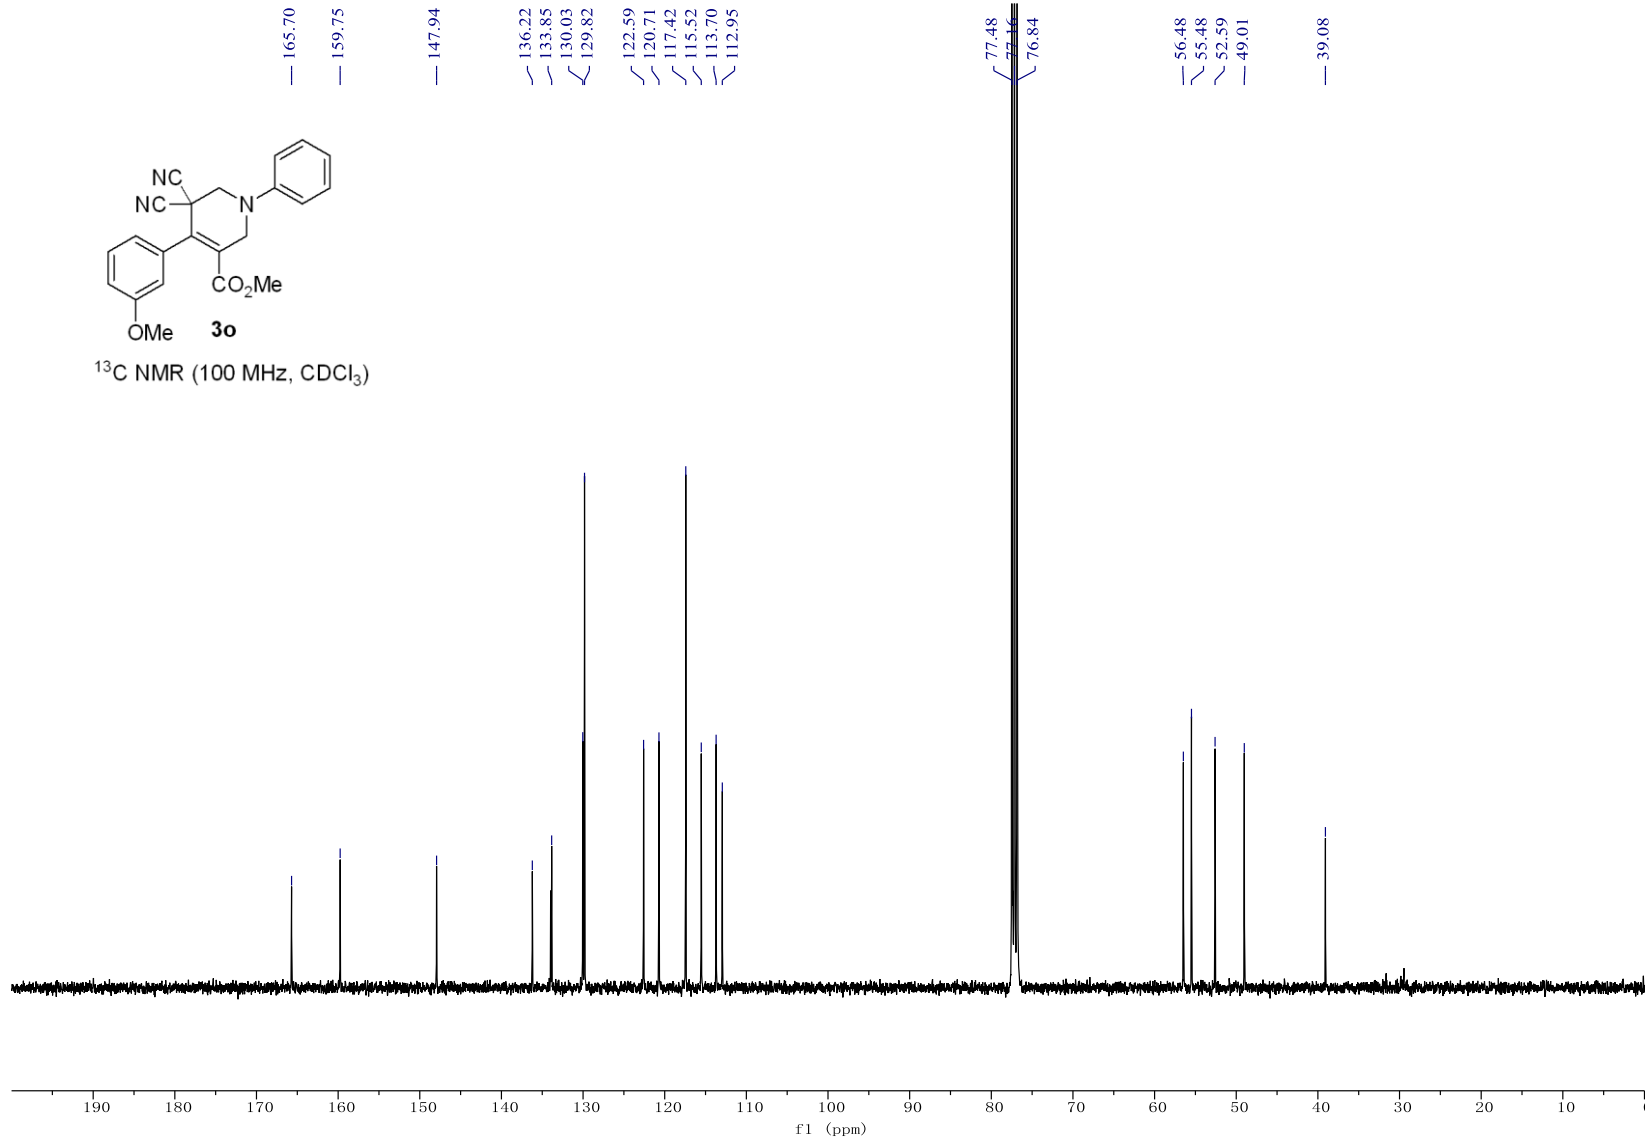

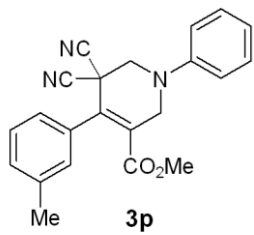

<sup>1</sup>H NMR (400 MHz, CDCl<sub>3</sub>)

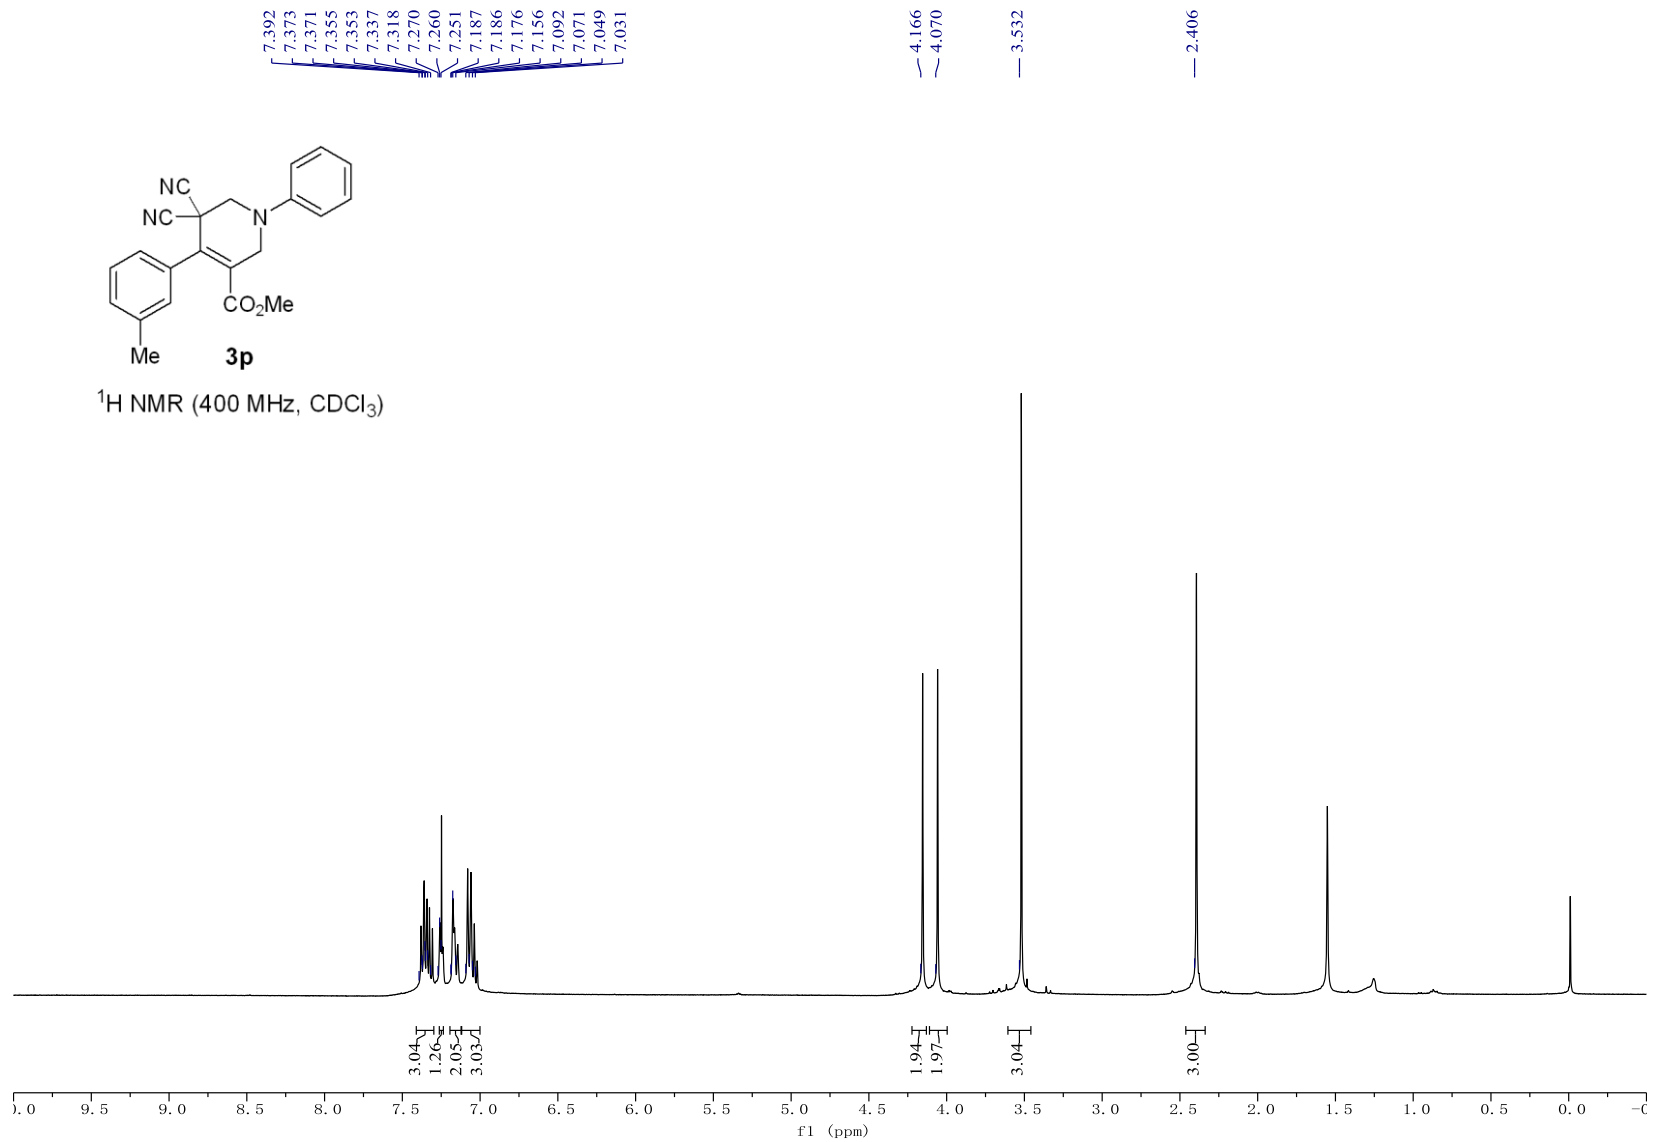

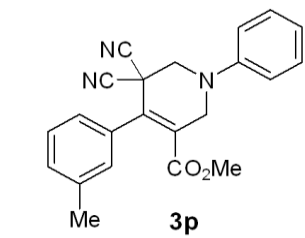

<sup>13</sup>C NMR (100 MHz, CDCl<sub>3</sub>)

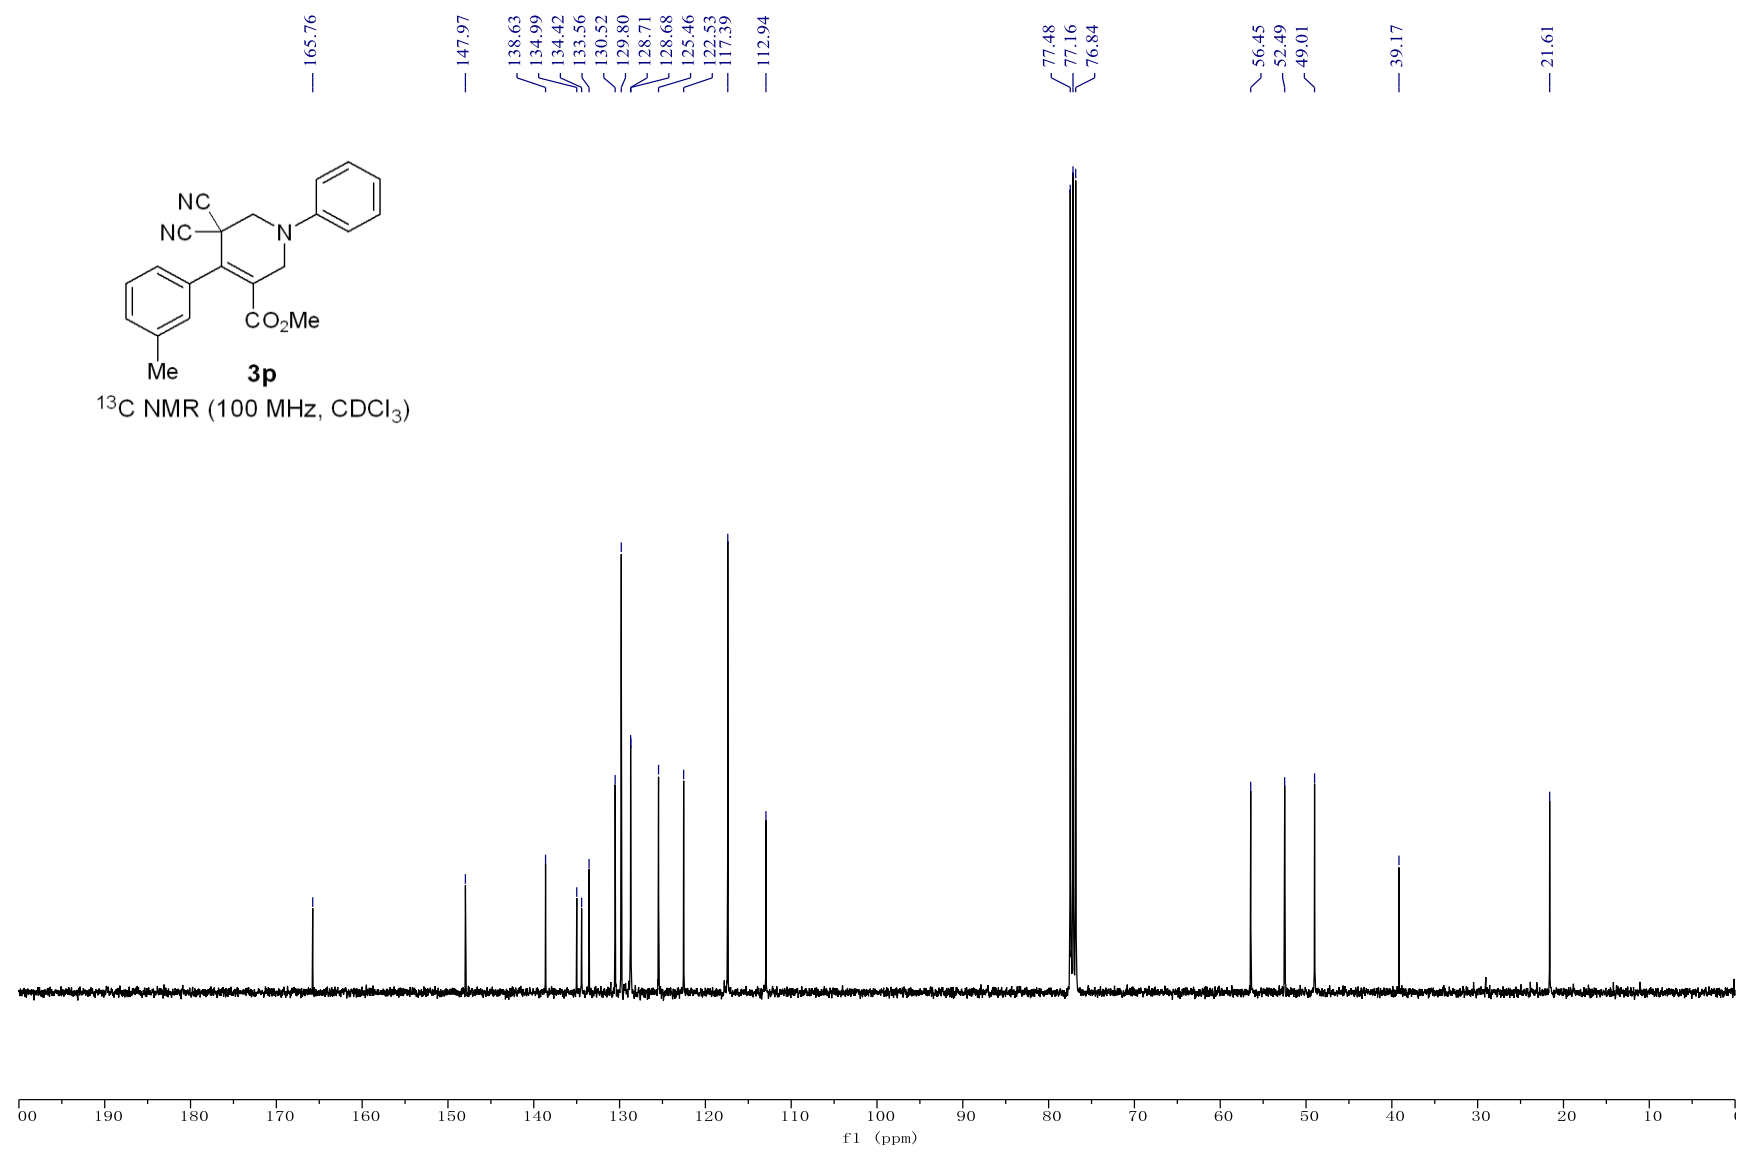

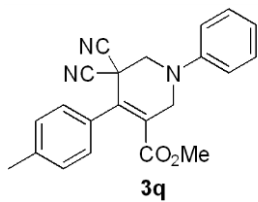

<sup>1</sup>H NMR (400 MHz, CDCl<sub>3</sub>)

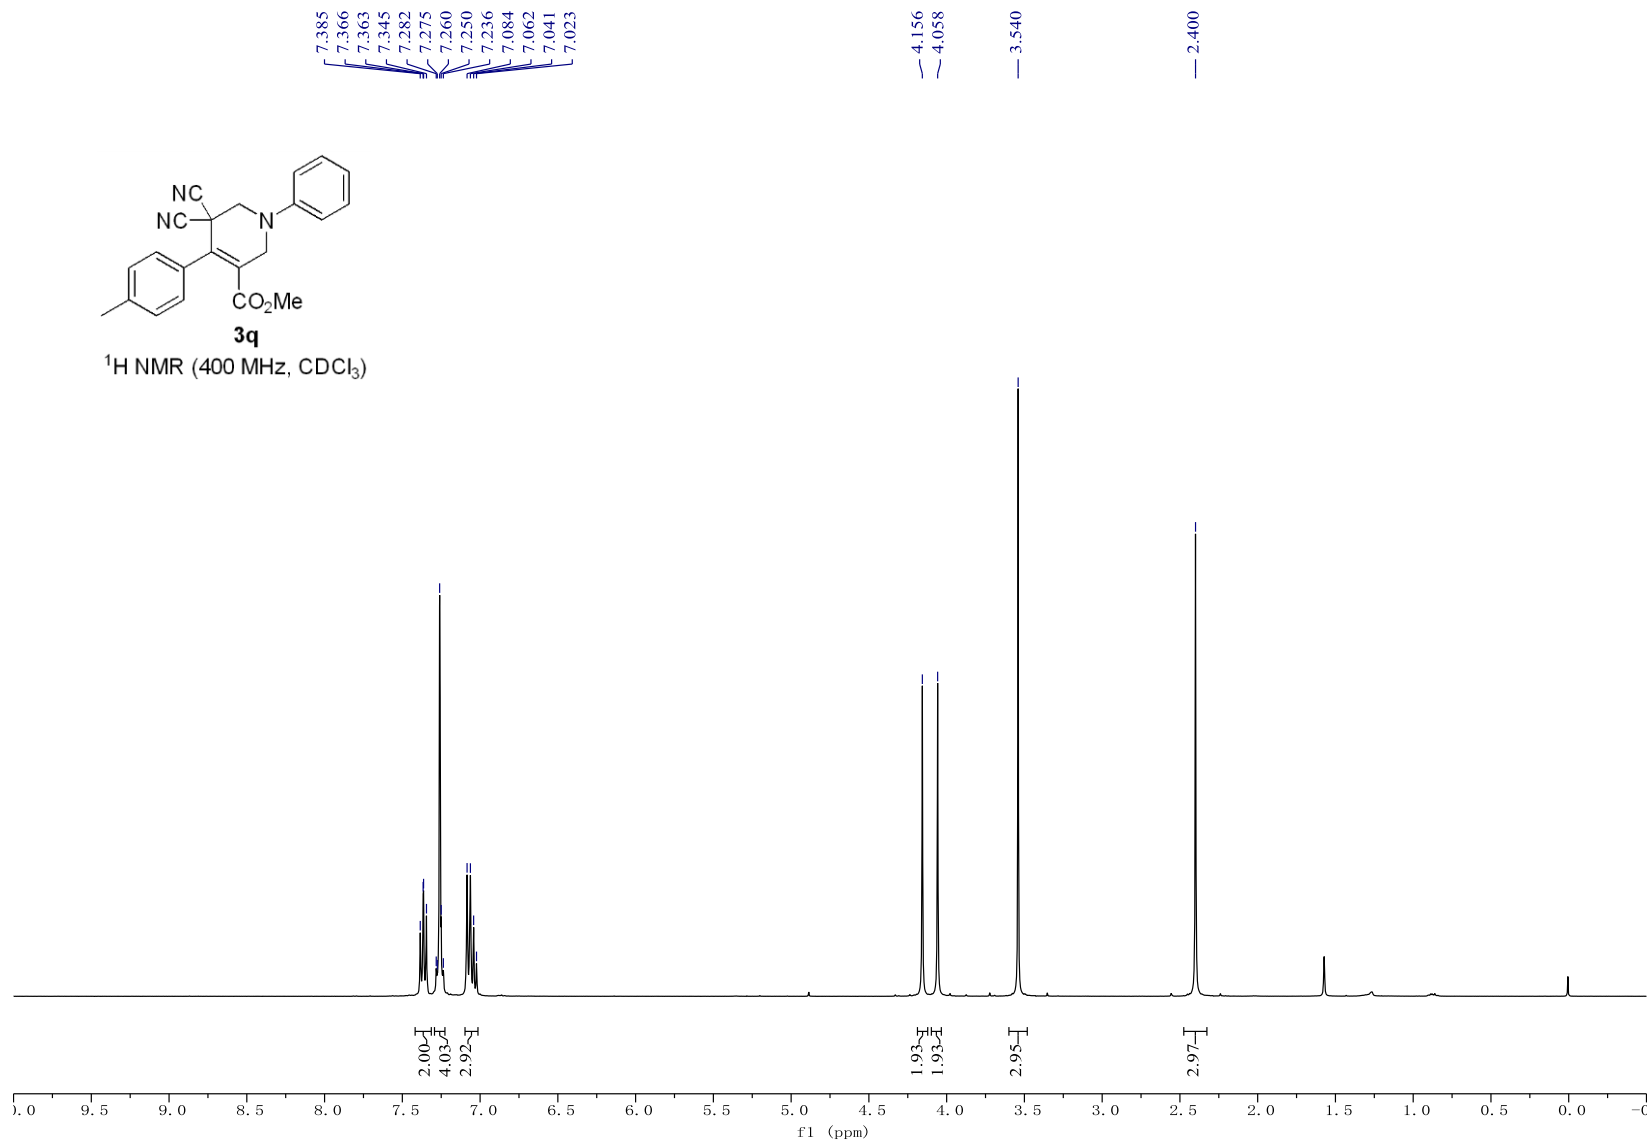

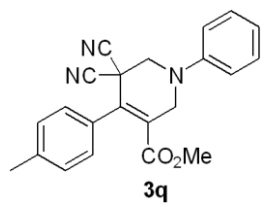

<sup>13</sup>C NMR (100 MHz, CDCl<sub>3</sub>)

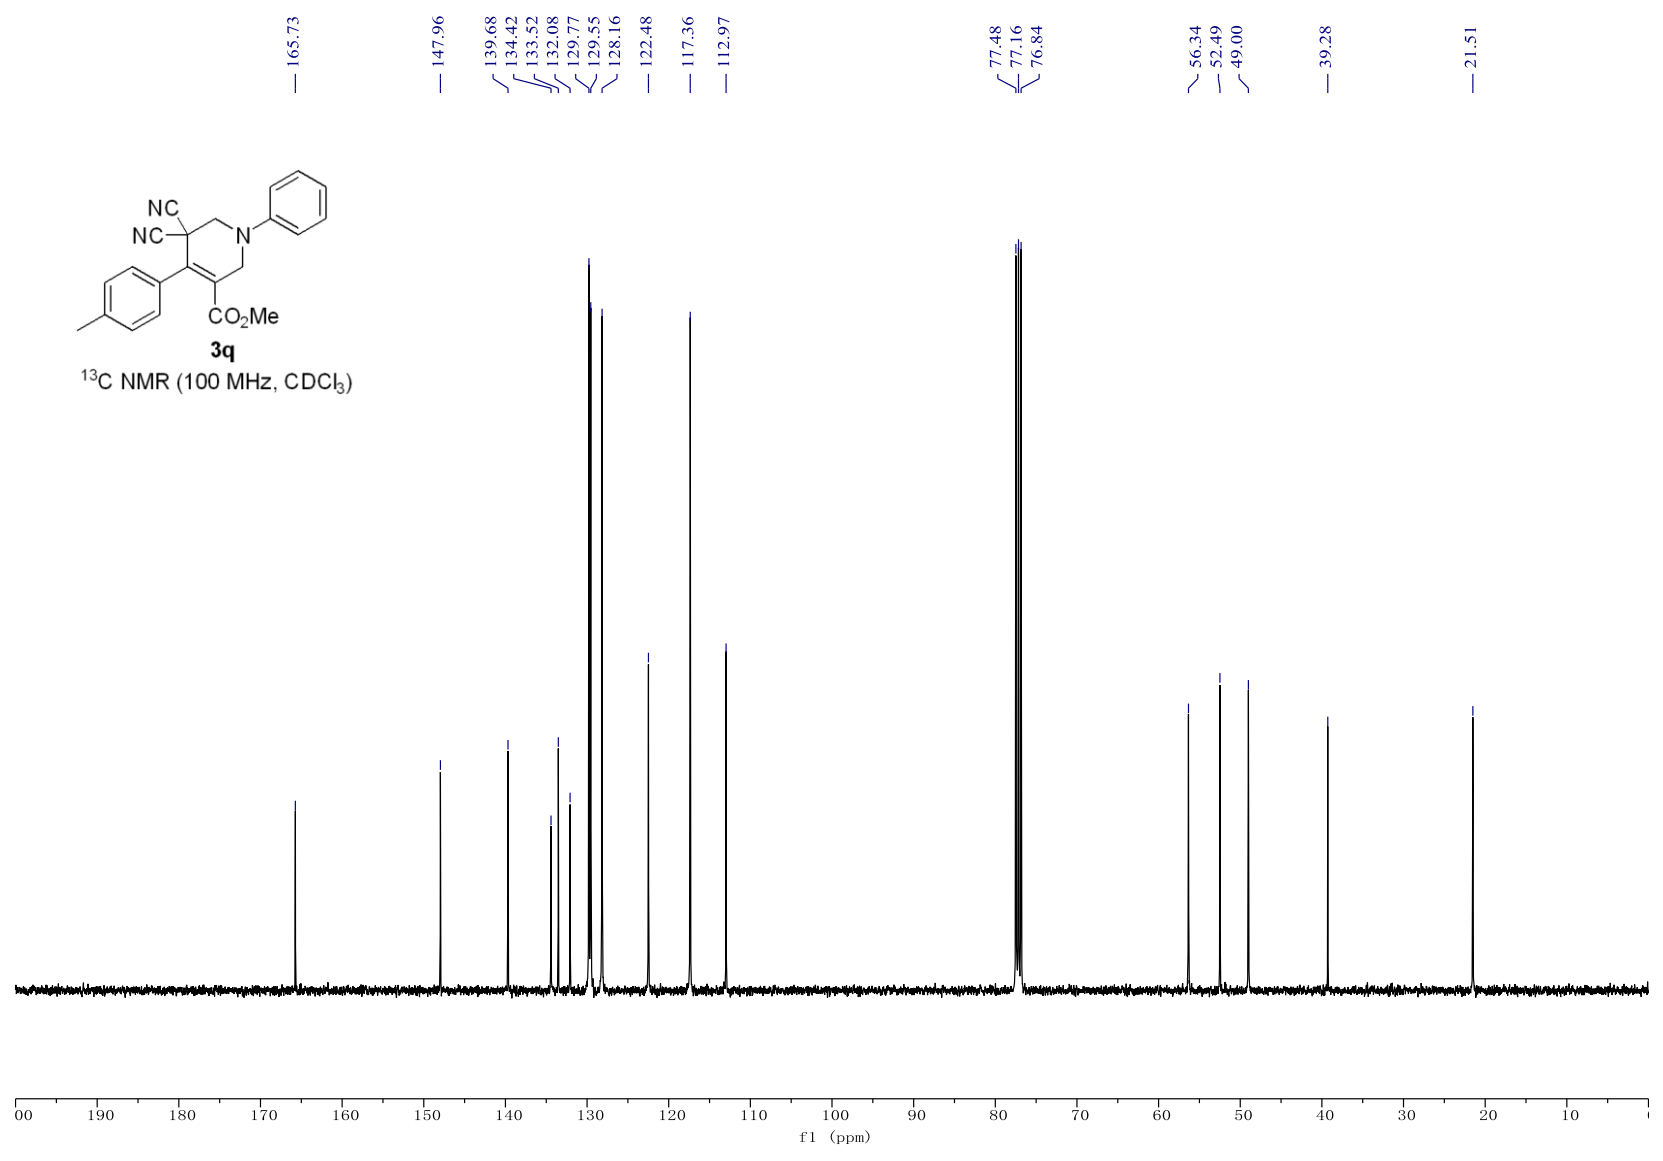

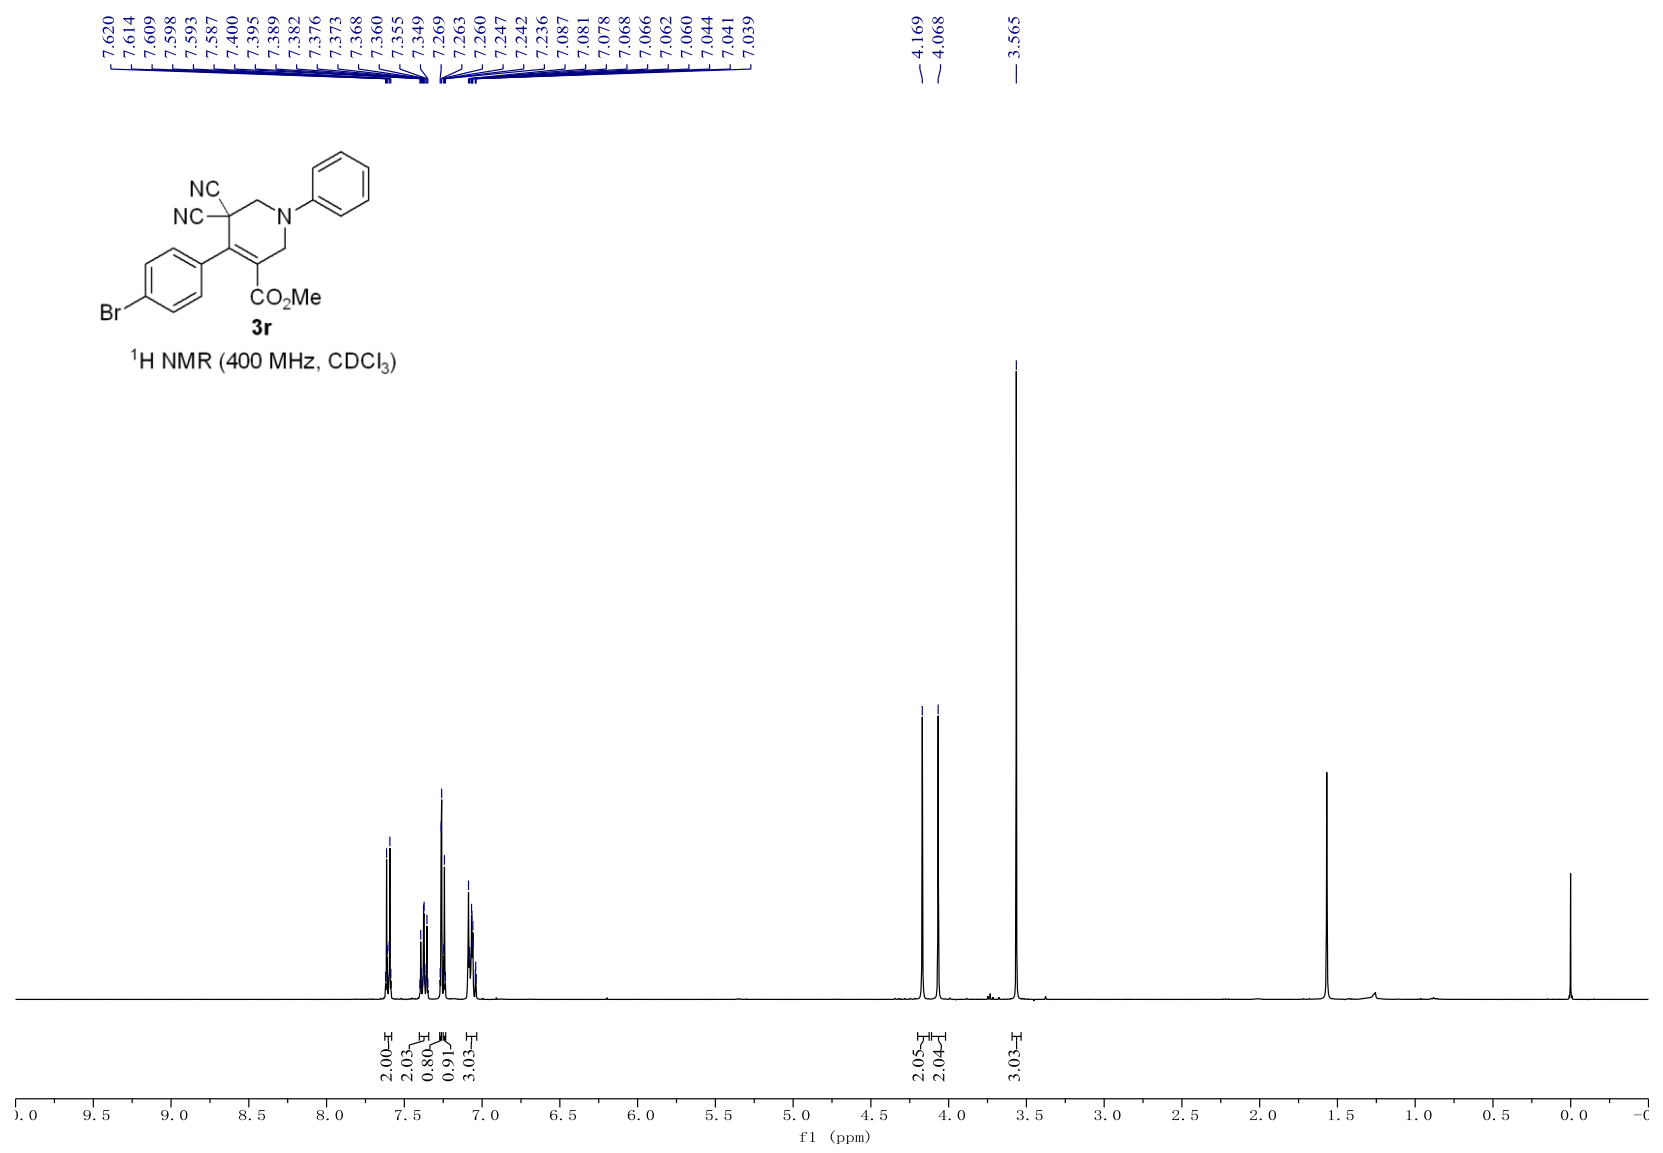

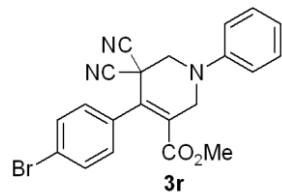

$^{13}\text{C}$  NMR (100 MHz,  $\text{CDCl}_3$ )

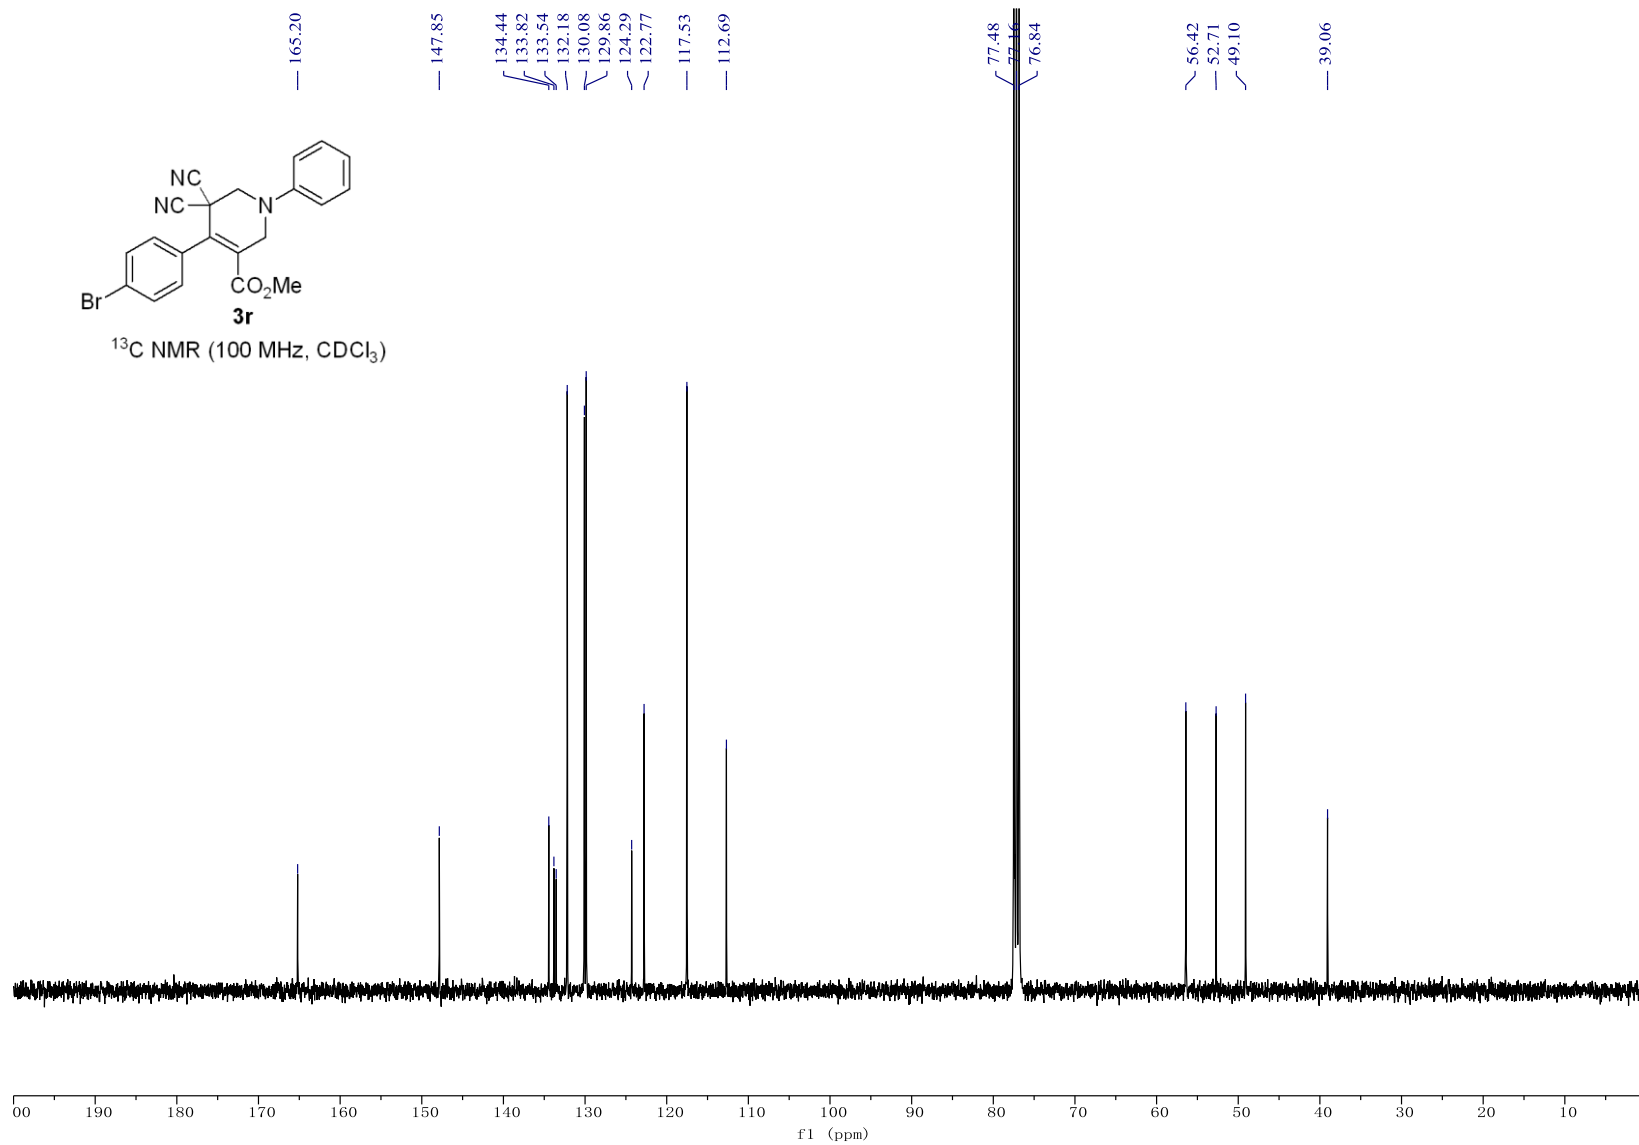



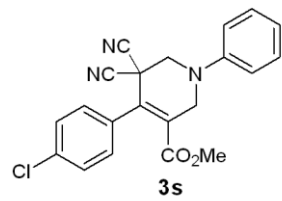

<sup>1</sup>H NMR (400 MHz, CDCl<sub>3</sub>)

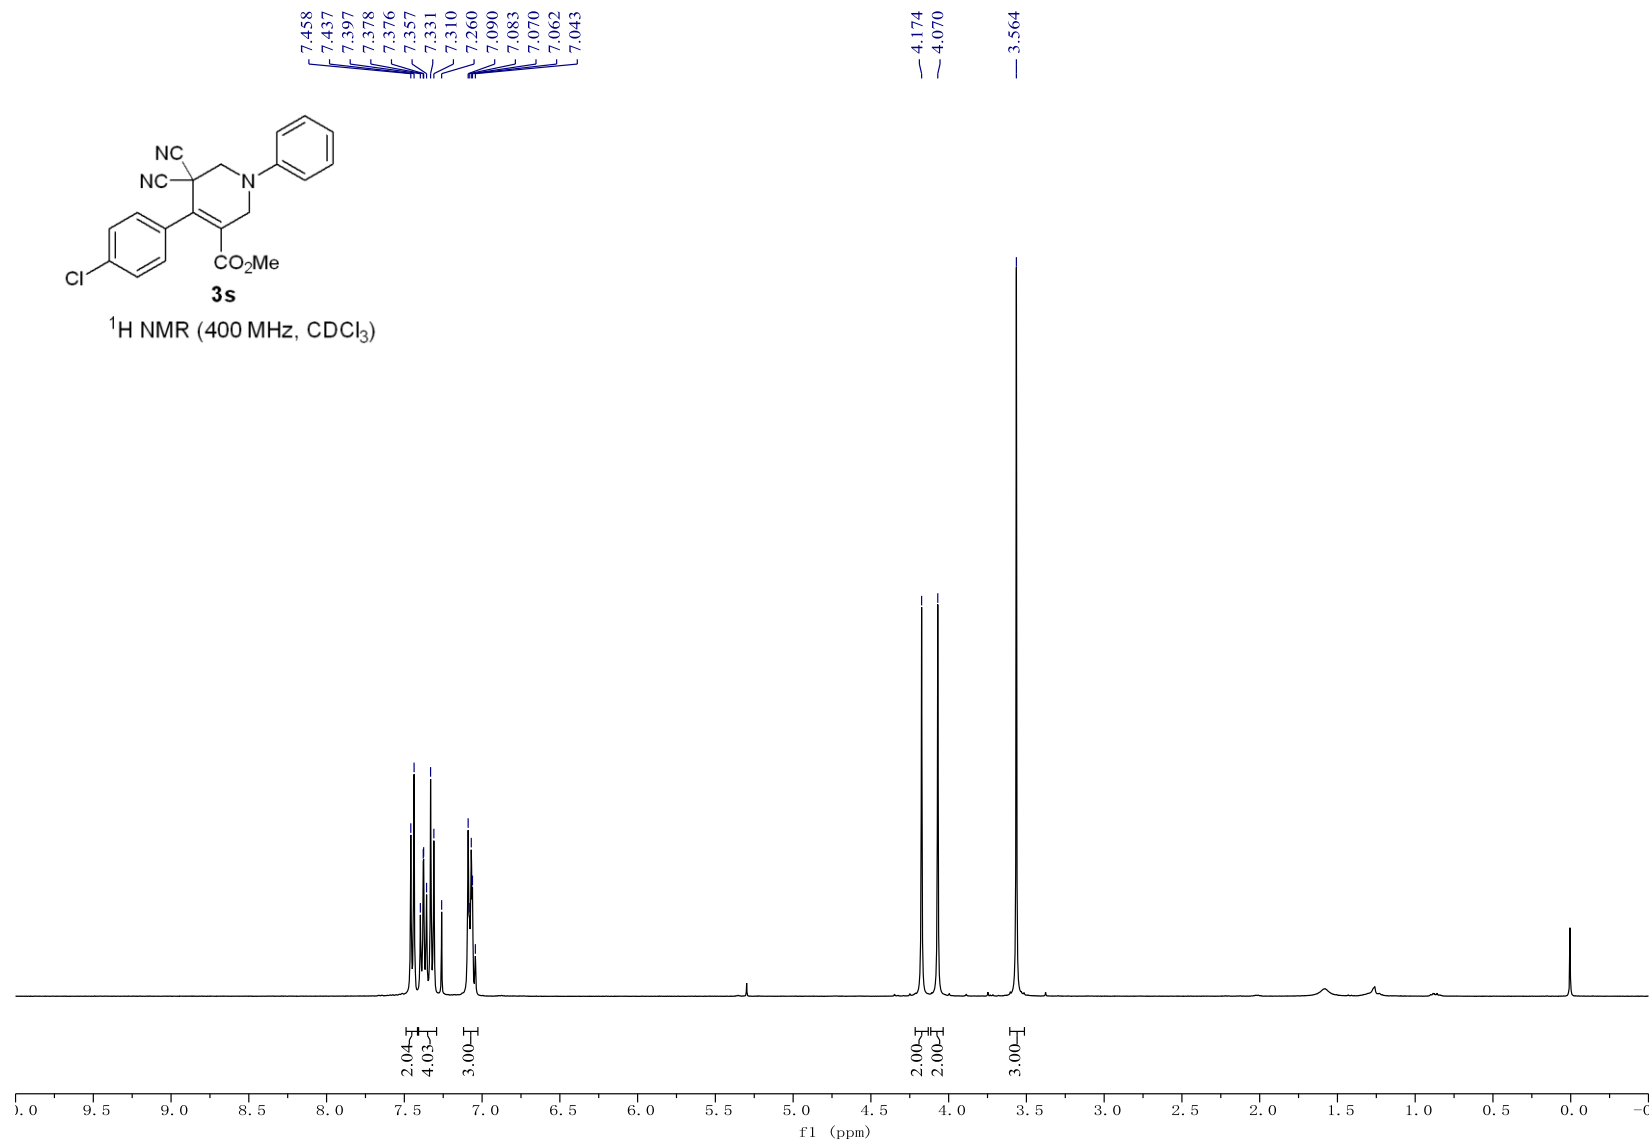

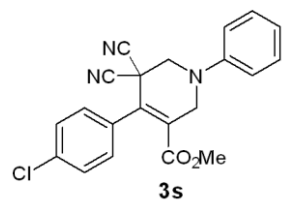

$^{13}\text{C}$  NMR (100 MHz,  $\text{CDCl}_3$ )

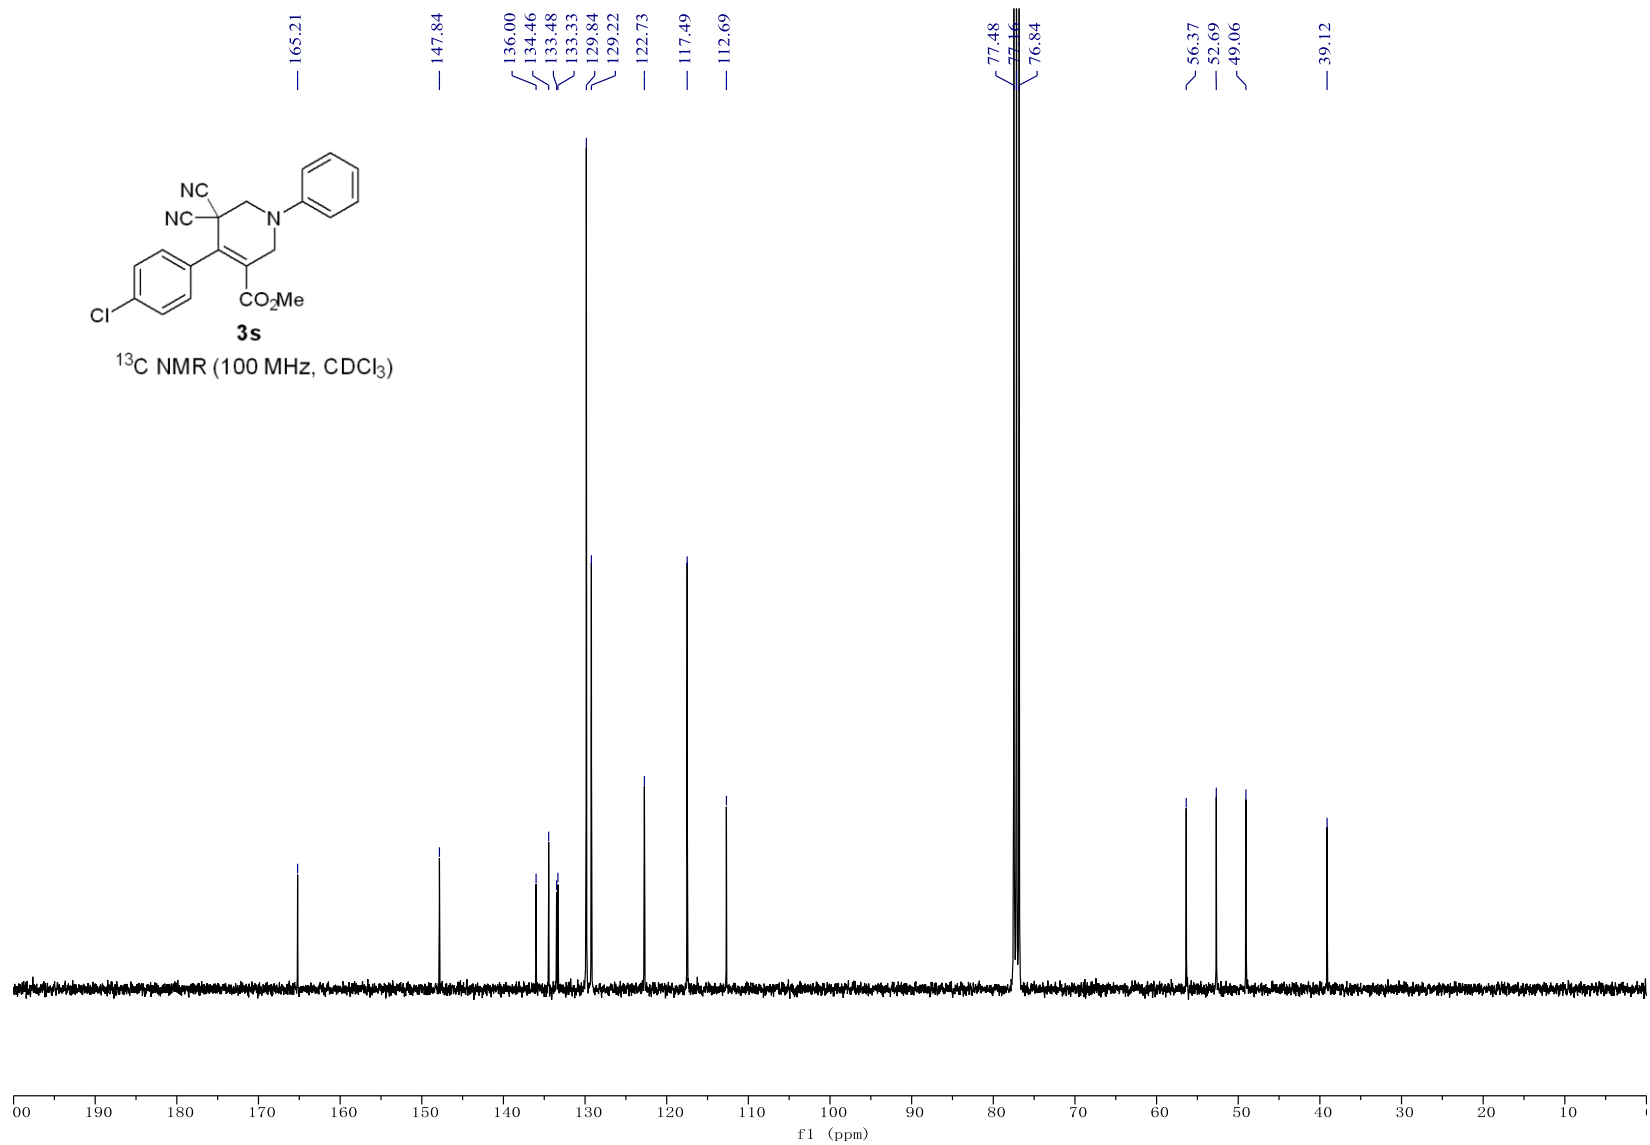

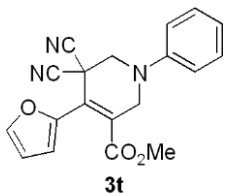

<sup>1</sup>H NMR (400 MHz, CDCl<sub>3</sub>)

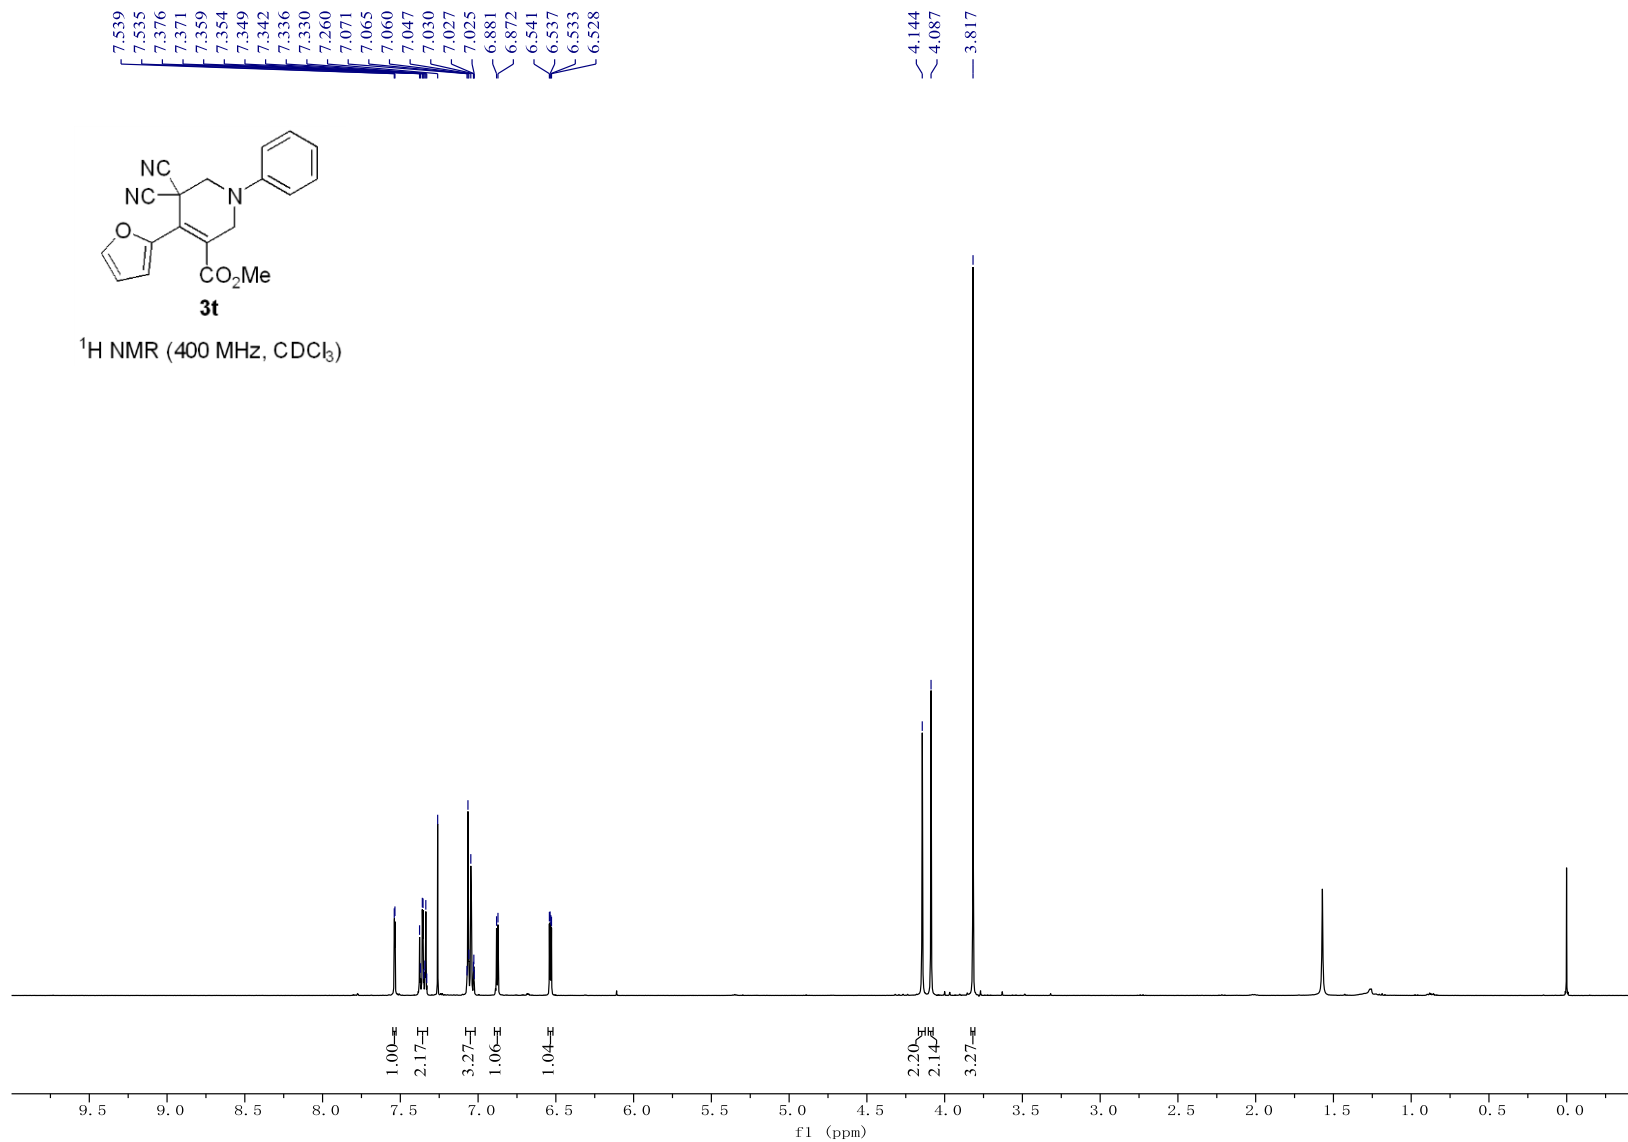

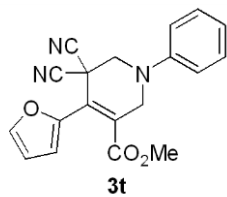

<sup>13</sup>C NMR (100 MHz, CDCl<sub>3</sub>)

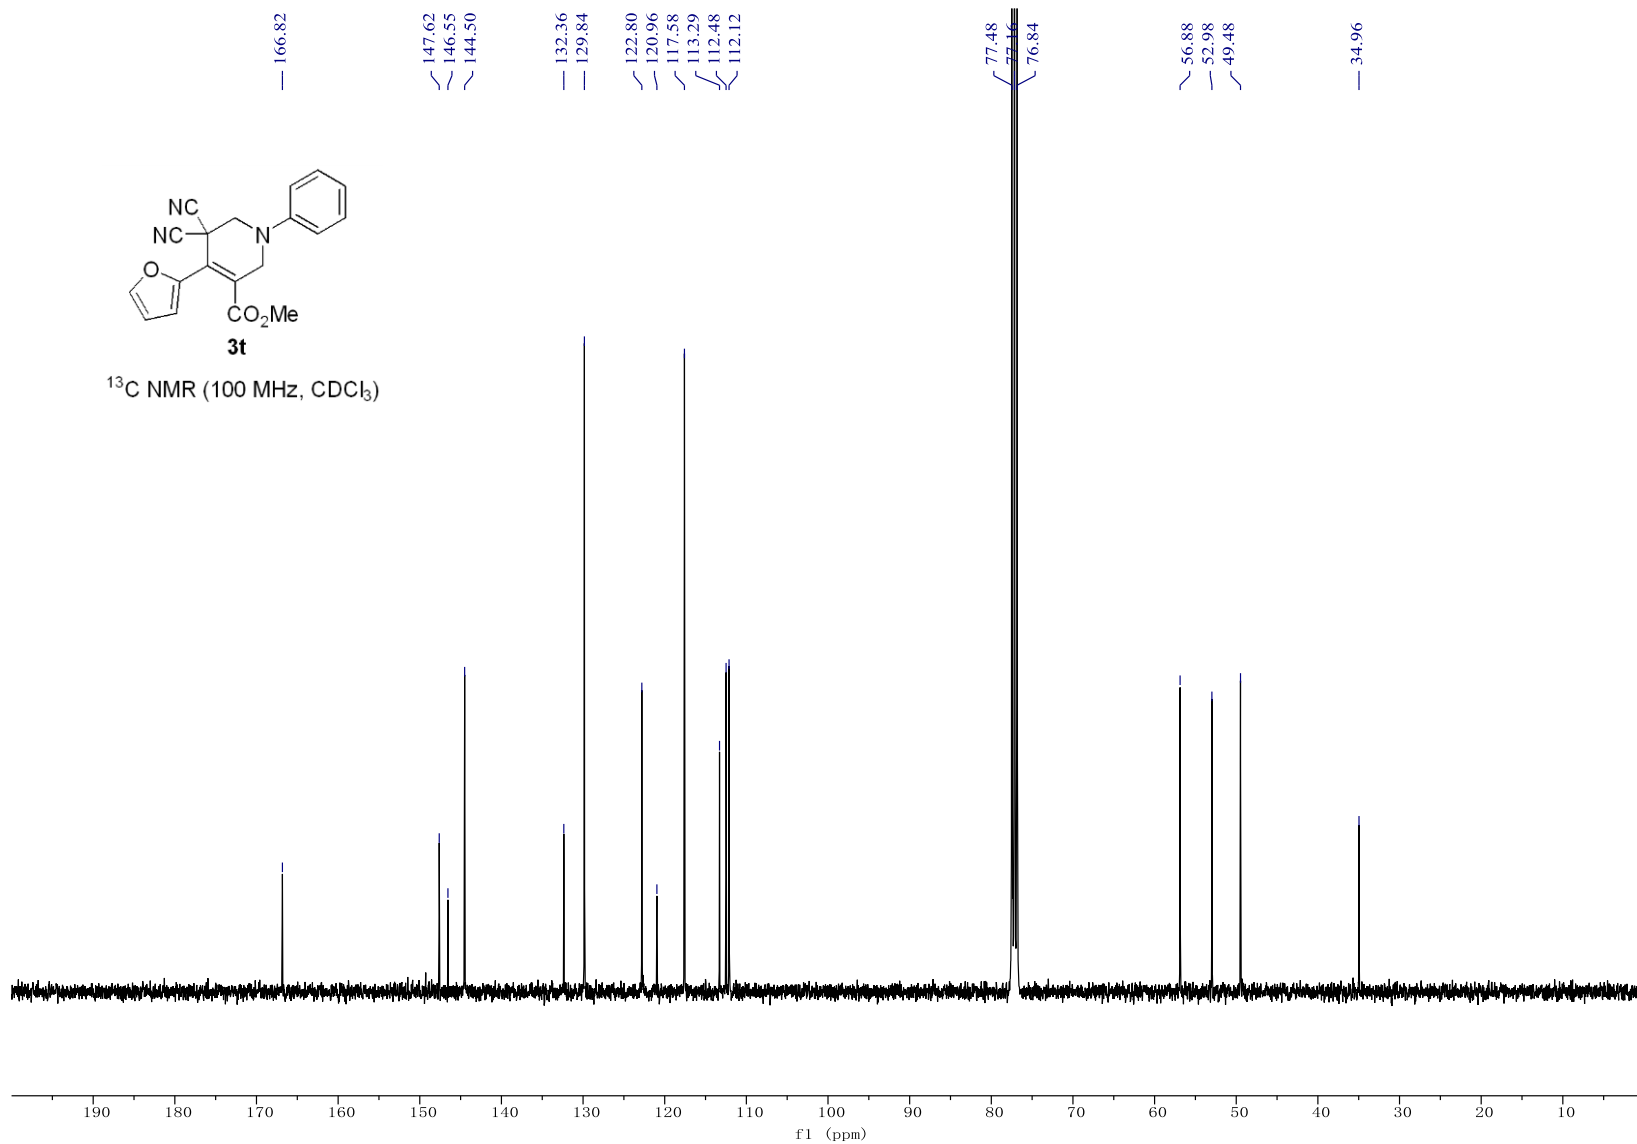

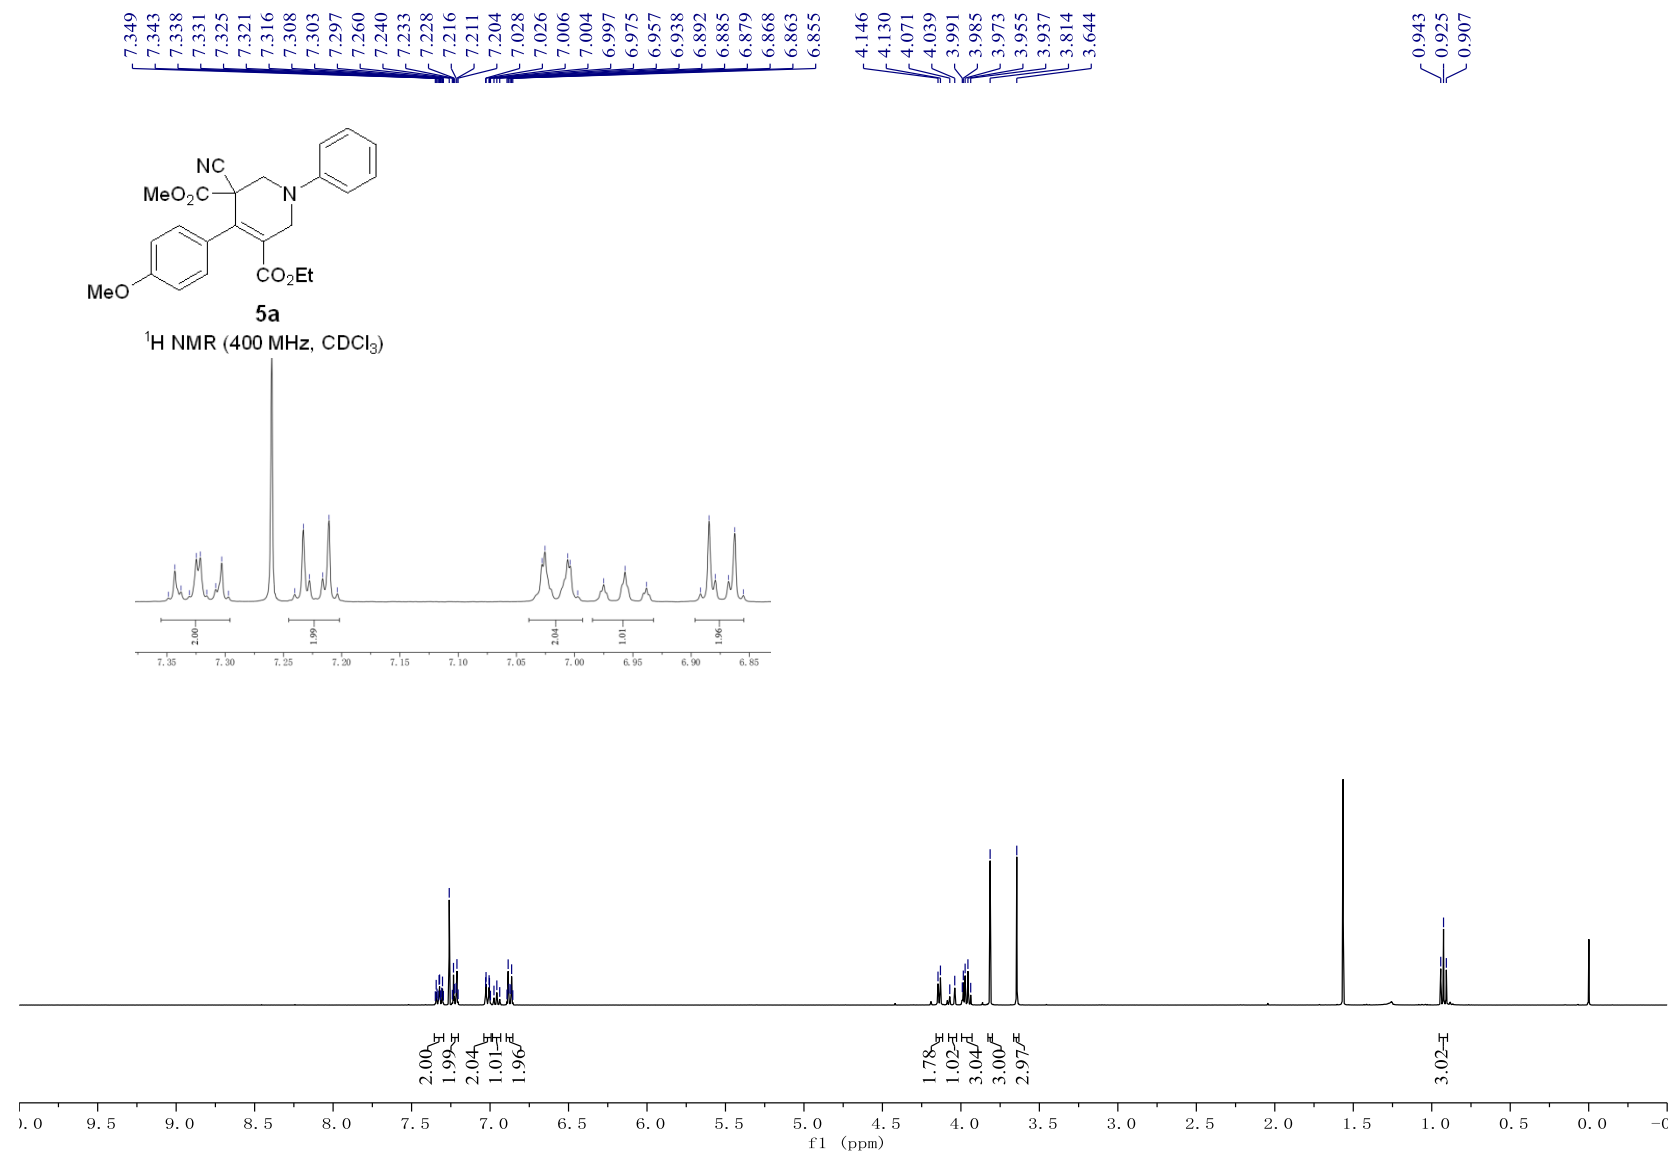

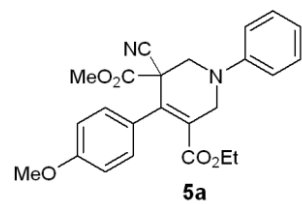

<sup>13</sup>C NMR (100 MHz, CDCl<sub>3</sub>)

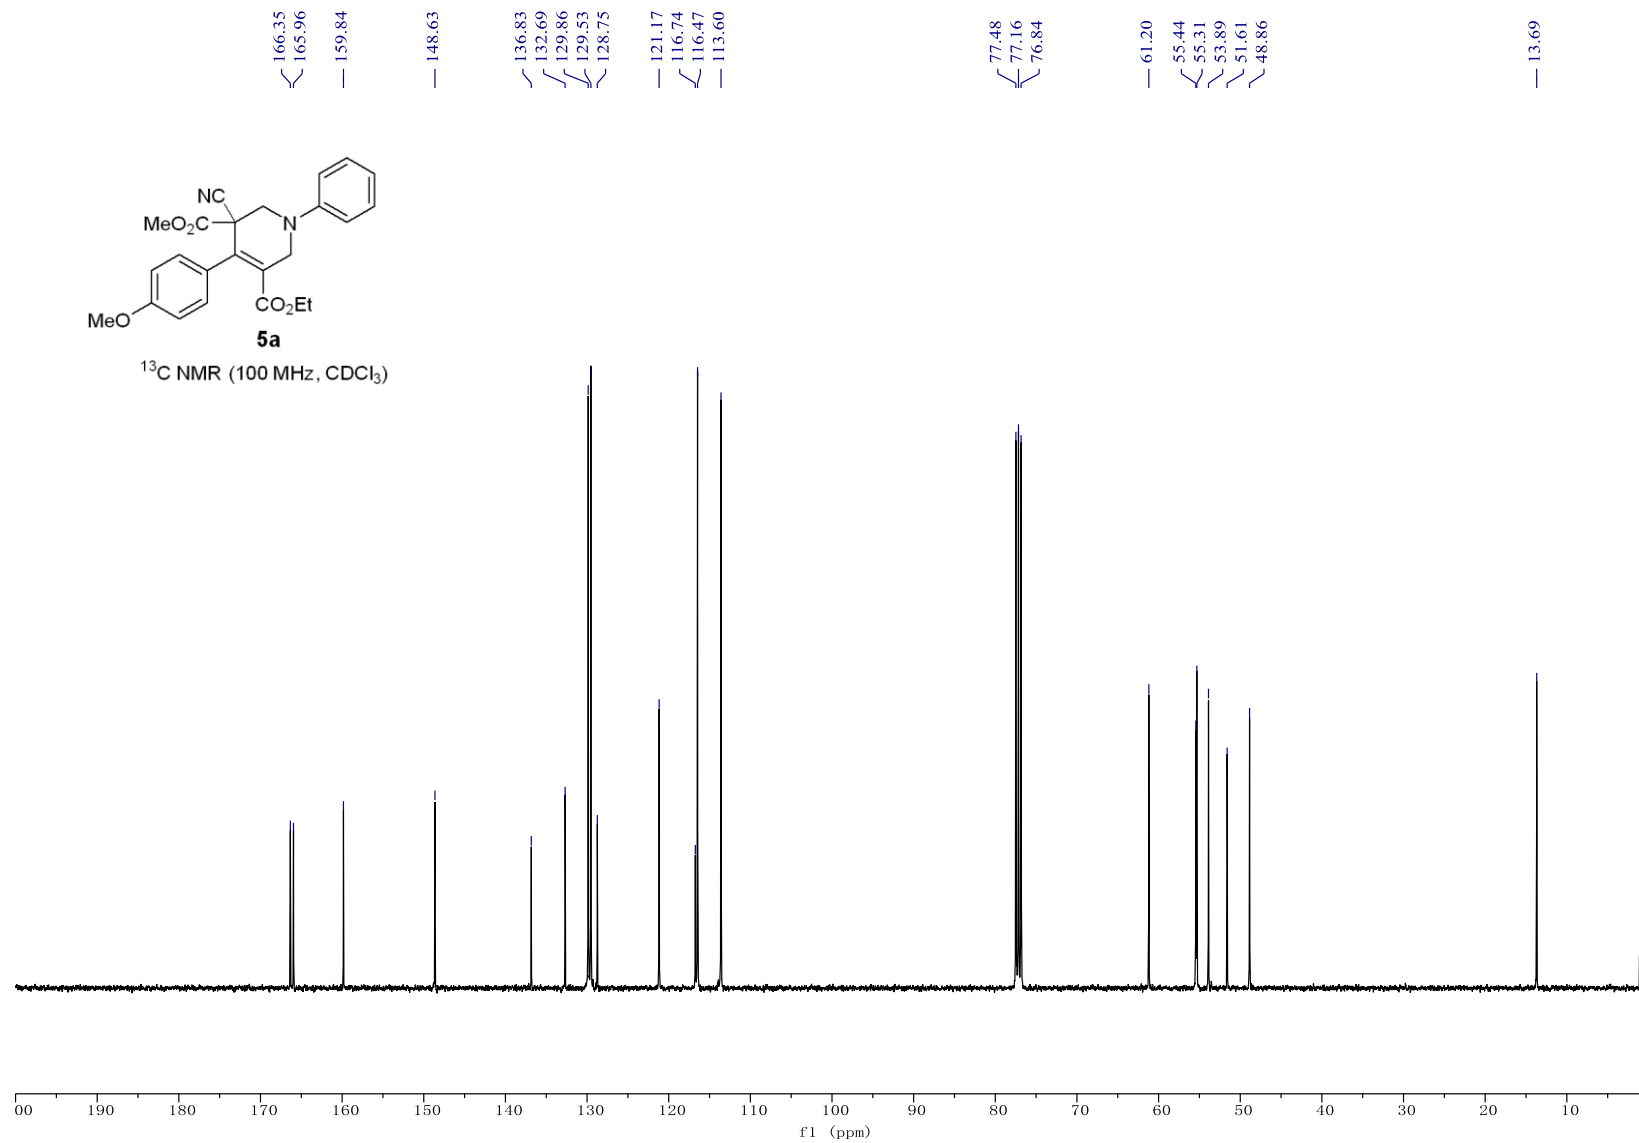

7.342  
7.337  
7.332  
7.324  
7.318  
7.315  
7.309  
7.302  
7.297  
7.291  
7.260  
7.243  
7.235  
7.230  
7.219  
7.213  
7.206  
7.028  
7.026  
7.021  
7.009  
7.006  
7.004  
6.967  
6.965  
6.963  
6.947  
6.931  
6.928  
6.926  
6.897  
6.890  
6.884  
6.873  
6.868  
6.860  
4.109  
4.099  
4.071  
4.039  
3.958  
3.927  
3.816  
3.631

— 1.157

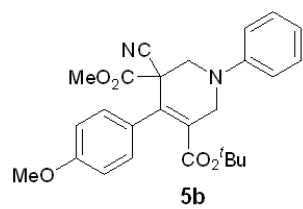

<sup>1</sup>H NMR (400 MHz, CDCl<sub>3</sub>)

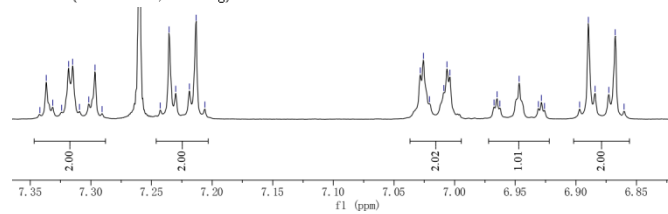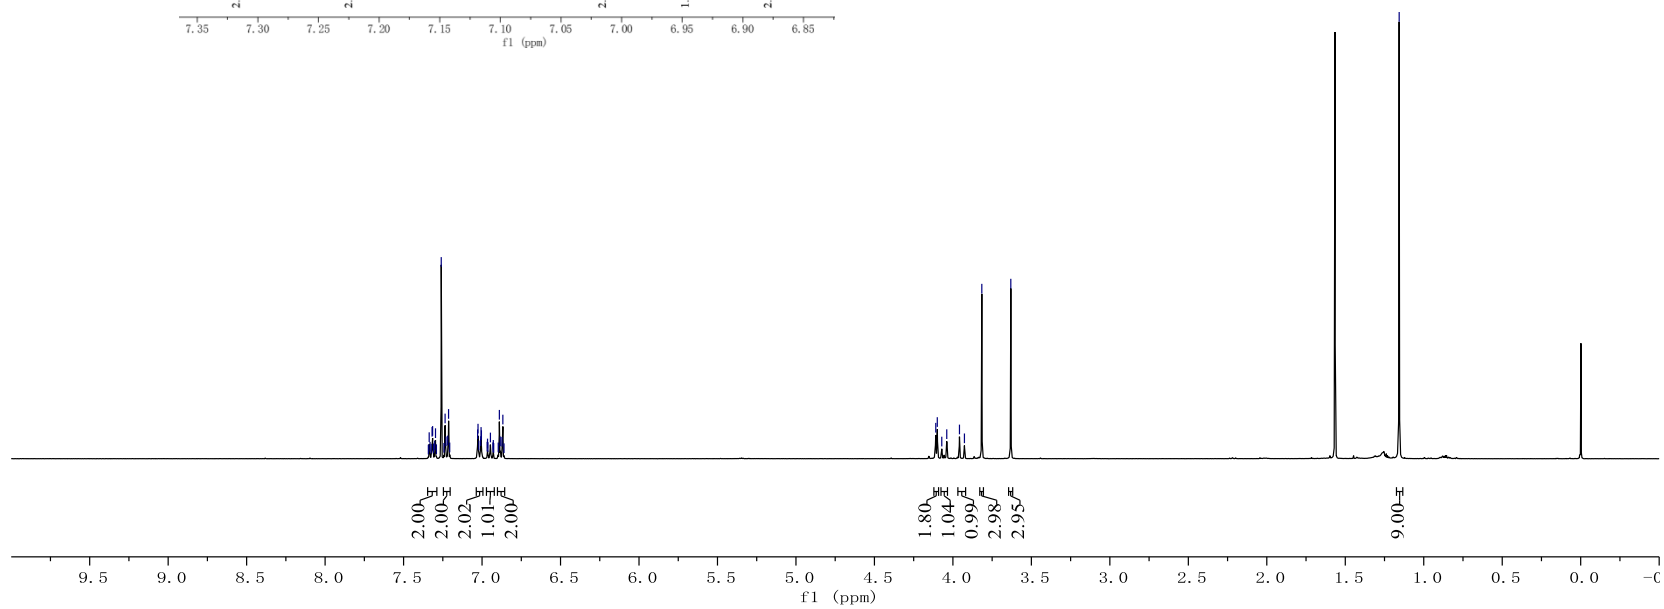

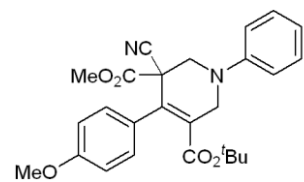

<sup>13</sup>C NMR (100 MHz, CDCl<sub>3</sub>)

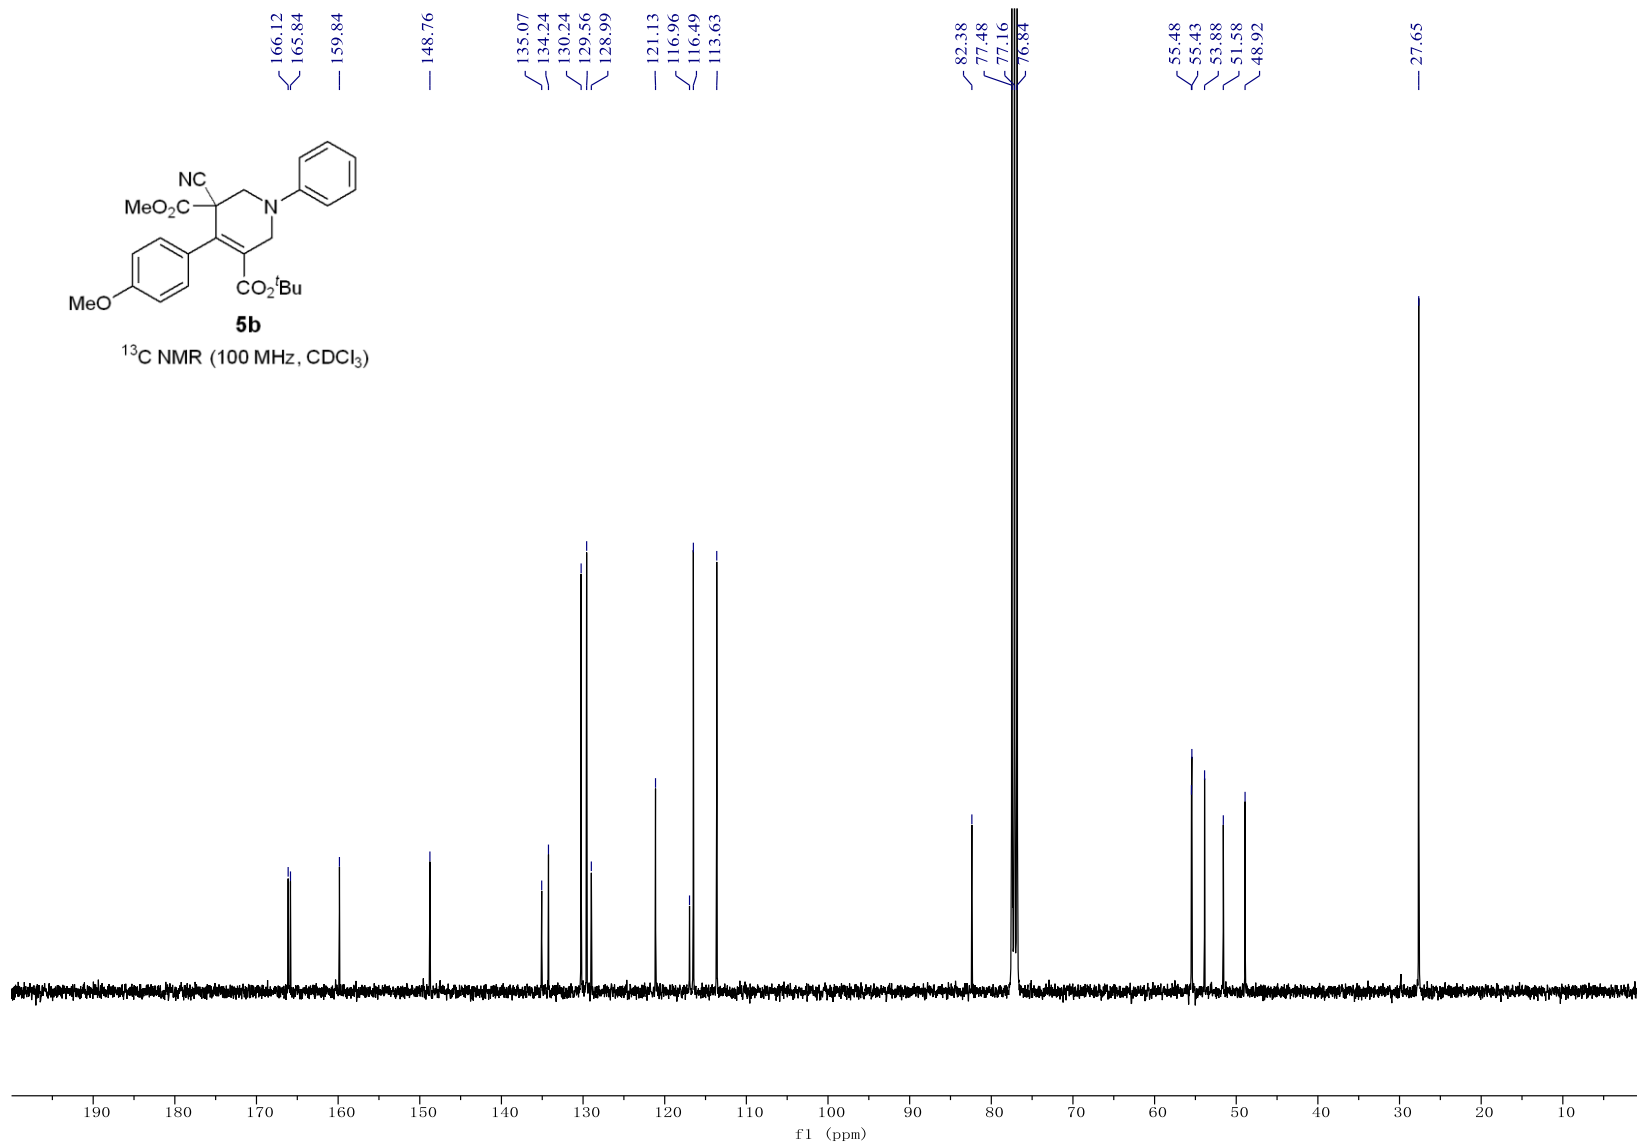



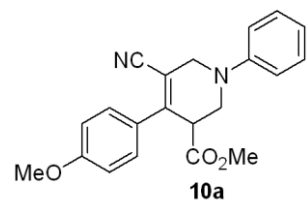

<sup>1</sup>H NMR (400 MHz, CDCl<sub>3</sub>)

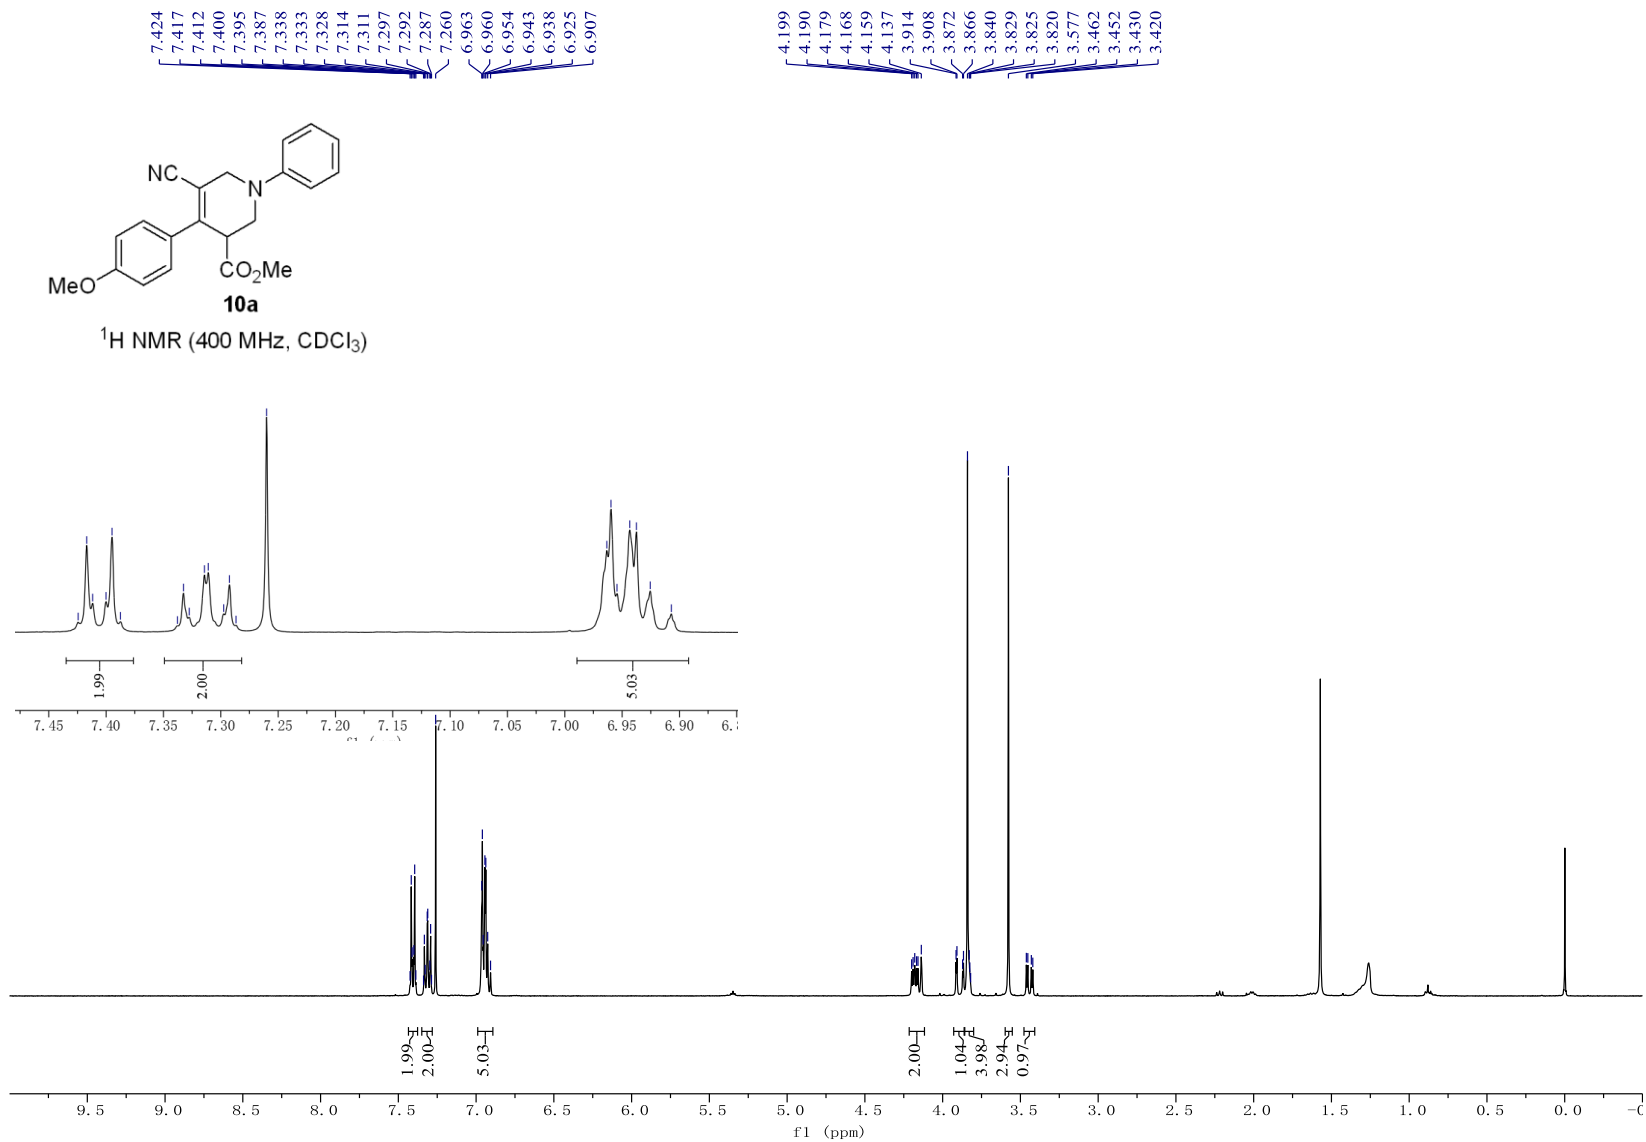

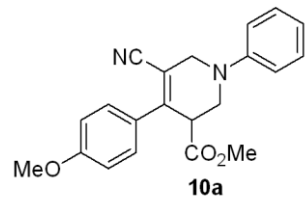

$^{13}\text{C}$  NMR (100 MHz,  $\text{CDCl}_3$ )

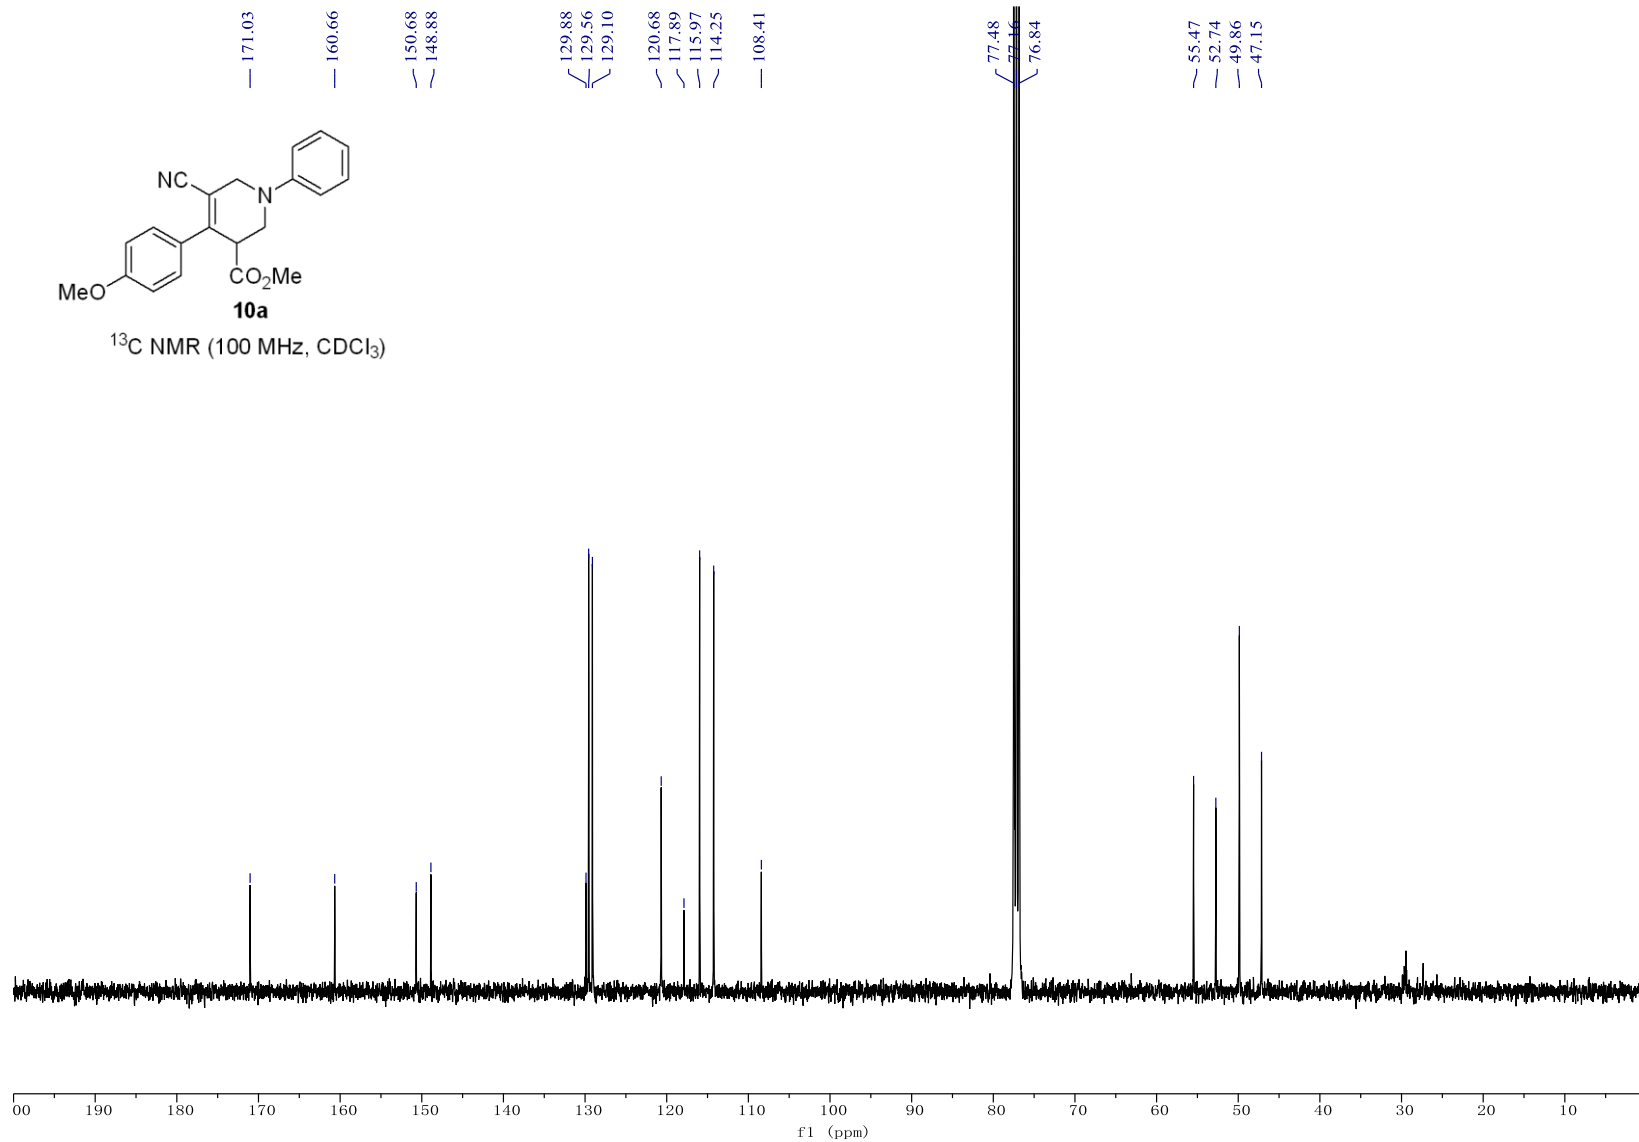

Supplement: d3ob00511a1.pdf [file d3ob00511a1.pdf]
